# Supplementary material for: Cu-catalysed Chan–Lam synthesis of unsymmetrical aryl chalcogenides under aqueous micellar conditions
Source: Royal Society of Chemistry journal article supplement (doi:10.1039/d3gc00051f), 2023-01-01
Supplement: d3gc00051f1.pdf [file d3gc00051f1.pdf]

## Supporting Information

### Cu-catalysed Chan-Lam Synthesis of Unsymmetrical Aryl Chalcogenides under Aqueous Micellar Conditions

Nan Sun,\* Kai Zheng, Mingqiang Zhan, Guowen Zheng, Liqun Jin, Baoxiang Hu, and Xinquan Hu\*

*College of Chemical Engineering, Zhejiang University of Technology, Hangzhou 310032, Hangzhou*

*310032, People's Republic of China*

*E-mail: [sunnan@zjut.edu.cn](mailto:sunnan@zjut.edu.cn) and [xinquan@zjut.edu.cn](mailto:xinquan@zjut.edu.cn)*

#### Table of Contents

|                                                                                                                       |      |
|-----------------------------------------------------------------------------------------------------------------------|------|
| 1. General remarks.....                                                                                               | S-2  |
| 2. Characterization data for all synthesized aryl selenides and aryl sulfides.....                                    | S-2  |
| 3. <sup>1</sup> H NMR and <sup>13</sup> C NMR spectra.....                                                            | S-17 |
| 4. <sup>77</sup> Se NMR spectra.....                                                                                  | S-65 |
| 5. <sup>19</sup> F NMR spectra of <b>3ad</b> , <b>3ag</b> , <b>3am</b> , <b>3ap</b> , <b>3ch</b> and <b>5ed</b> ..... | S-79 |

## 1. General remarks

The reaction substrates diorganyl diselenides and disulfides (**1b**, **1c**, **1d**, **1e**, **1f**, **1g**, **1h** and **4e**) were synthesized according to literature methods.<sup>[1-4]</sup> Water-soluble ligand PEG-1500-PyTa, PEG-2000-PyTa and PEG-5000-PyTa were synthesized according to our previously reported method.<sup>[5]</sup> Other chemicals were commercially available and used as purchased. All <sup>1</sup>H, <sup>13</sup>C and <sup>77</sup>Se NMR spectra were recorded on a Bruker ADVANCE III 500 MHz spectrometer in deuterated solvents with tetramethylsilane (TMS) as internal standard. The <sup>77</sup>Se NMR spectra were obtained with diphenyl diselenide ( $\delta = 461$  ppm) as external standard. All <sup>19</sup>F NMR spectra were obtained on a Bruker ADVANCE NEO 400 MHz spectrometer in deuterated solvents using CFCl<sub>3</sub> ( $\delta = 0$  ppm) as external standard. High resolution mass spectrum of **5gu** was recorded in the EI mode on an Agilent 8890 GC coupled with a 7250 Q-TOF mass spectrometer. Melting points (uncorrected) were determined on a BUCHI M-565 apparatus. UV-Vis spectrum analyses were performed on a Shimadzu UV-2600 spectrophotometer. TEM analyses were performed on a FEI Tecnai G2 F20 S-Twin microscope. Gas chromatography (GC) analyses were performed on a Shimadzu GC-2010 Plus instrument with FID detector using a Shimadzu SH-Rtx-5 capillary column (30 m x 0.32 mm (i.d.), 0.25  $\mu$ m). Flash column chromatography was performed on silica gel (200-300 mesh) with petroleum ether/ethyl acetate as eluent.

## 3. Characterization data for all synthesized arylselenides and arylsulfides

**Note:** The synthesized arylselenides and arylsulfides except for **5gu** in this paper are known compounds.

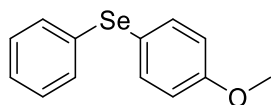

**4-Methoxyphenyl phenyl selenide 3aa**<sup>[6]</sup>: Yield: 96% (101 mg); Yellow oil; <sup>1</sup>H NMR (500 MHz,

CDCl<sub>3</sub>)  $\delta$  7.40-7.39 (m, 2H), 7.33 (dd,  $J = 7.7, 1.3$  Hz, 1H), 7.27-7.19 (m, 5H), 7.06 (td,  $J = 7.5, 1.8$  Hz, 1H), 2.39 (s, 3H) ppm; <sup>13</sup>C{<sup>1</sup>H} NMR (125 MHz, CDCl<sub>3</sub>)  $\delta$  159.9, 136.6, 133.3, 131.0, 129.3, 126.6, 120.1, 115.3, 55.4 ppm; <sup>77</sup>Se NMR (95.5 MHz, CDCl<sub>3</sub>)  $\delta$  419.69 ppm.

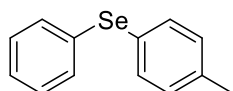

**4-Methylphenyl phenyl selenide 3ab**<sup>[6]</sup>: Yield: 94% (93 mg); Yellow oil; <sup>1</sup>H NMR (500 MHz, CDCl<sub>3</sub>)  $\delta$  7.41-7.39 (m, 4H), 7.25-7.19 (m, 3H), 7.09 (d,  $J = 7.9$  Hz, 2H), 2.32 (s, 3H) ppm; <sup>13</sup>C NMR (125 MHz, CDCl<sub>3</sub>)  $\delta$  137.8, 134.0, 132.2, 132.1, 130.3, 129.3, 127.0, 126.9, 21.3 ppm; <sup>77</sup>Se NMR (95.5 MHz, CDCl<sub>3</sub>)  $\delta$  424.97 ppm.

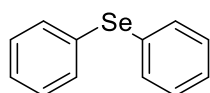

**Diphenyl selenide 3ac**<sup>[6]</sup>: Yellow oil; <sup>1</sup>H NMR (500 MHz, CDCl<sub>3</sub>)  $\delta$  7.47-7.45 (m, 4H), 7.26-7.25 (m, 6H) ppm; <sup>13</sup>C NMR (125 MHz, CDCl<sub>3</sub>)  $\delta$  133.1, 131.3, 129.4, 127.4 ppm; <sup>77</sup>Se NMR (95.5 MHz, CDCl<sub>3</sub>)  $\delta$  421.37 ppm.

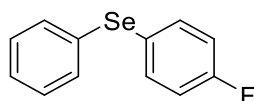

**4-Fluorophenyl phenyl selenide 3ad**<sup>[6]</sup>: Yield: 93% (93 mg); Yellow oil; <sup>1</sup>H NMR (500 MHz, CDCl<sub>3</sub>)  $\delta$  7.47-7.44 (m, 2H), 7.38-7.35 (m, 2H), 7.29-7.27 (m, 3H), 7.24-7.21 (m, 2H) ppm; <sup>13</sup>C NMR (125 MHz, CDCl<sub>3</sub>)  $\delta$  162.7 (d,  $J = 247.7$  Hz), 135.8 (d,  $J = 7.9$  Hz), 132.4, 131.8, 129.5, 127.4, 125.3 (d,  $J = 3.4$  Hz), 116.7 (d,  $J = 21.6$  Hz) ppm; <sup>77</sup>Se NMR (95.5 MHz, CDCl<sub>3</sub>)  $\delta$  418.44 ppm; <sup>19</sup>F NMR (376 MHz, CDCl<sub>3</sub>)  $\delta$  -113.98 ppm.

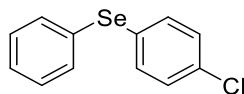

**4-Chlorophenyl phenyl selenide 3ae**<sup>[6]</sup>: Yield: 97% (104 mg); Yellow oil; <sup>1</sup>H NMR (500 MHz, CDCl<sub>3</sub>)

$\delta$  7.50-7.48 (m, 2H), 7.41-7.39 (m, 2H), 7.32-7.30 (m, 3H), 7.28-7.25 (m, 2H) ppm;  $^{13}\text{C}$  NMR (125 MHz,  $\text{CDCl}_3$ )  $\delta$  134.2, 133.6, 133.3, 130.8, 129.7, 129.6, 127.8 ppm;  $^{77}\text{Se}$  NMR (95.5 MHz,  $\text{CDCl}_3$ )  $\delta$  415.05 ppm.

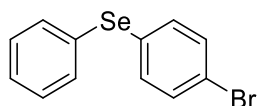

**4-Bromophenyl phenyl selenide 3af**<sup>[6]</sup>: Yield: 91% (114 mg); Colorless oil;  $^1\text{H}$  NMR (500 MHz,  $\text{CDCl}_3$ )  $\delta$  7.47-7.44 (m, 2H), 7.37-7.35 (m, 2H), 7.29-7.26 (m, 5H) ppm;  $^{13}\text{C}$  NMR (125 MHz,  $\text{CDCl}_3$ )  $\delta$  134.4, 133.5, 132.5, 131.6, 129.6, 129.3, 127.9, 121.6 ppm;  $^{77}\text{Se}$  NMR (95.5 MHz,  $\text{CDCl}_3$ )  $\delta$  420.18 ppm.

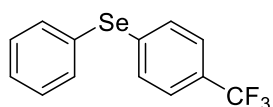

**Phenyl 4-trifluoromethylphenyl selenide 3ag**<sup>[6]</sup>: Yield: 93% (112 mg); Yellow solid, m.p. 59-62 °C;  $^1\text{H}$  NMR (500 MHz,  $\text{CDCl}_3$ )  $\delta$  7.58-7.56 (m, 2H), 7.43 (q,  $J = 8.5$  Hz, 4H), 7.38-7.32 (m, 3H) ppm;  $^{13}\text{C}$  NMR (125 MHz,  $\text{CDCl}_3$ )  $\delta$  137.9, 135.0, 131.2, 129.9, 128.9 (q,  $J = 32.7$  Hz), 128.8, 128.7, 126.0 (q,  $J = 3.7$  Hz), 124.3 (q,  $J = 272.0$  Hz) ppm;  $^{77}\text{Se}$  NMR (95.5 MHz,  $\text{CDCl}_3$ )  $\delta$  463.50 ppm;  $^{19}\text{F}$  NMR (376 MHz,  $\text{CDCl}_3$ )  $\delta$  -62.54 ppm.

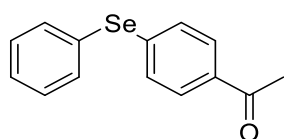

**4-Acetylphenyl phenyl selenide 3ah**<sup>[6]</sup>: Yield: 94% (104 mg); Yellow solid, m.p. 59-63 °C;  $^1\text{H}$  NMR (500 MHz,  $\text{CDCl}_3$ )  $\delta$  7.79-7.77 (m, 2H), 7.60-7.58 (m, 2H), 7.40-7.33 (m, 5H), 2.55 (s, 3H) ppm;  $^{13}\text{C}$  NMR (125 MHz,  $\text{CDCl}_3$ )  $\delta$  197.4, 140.4, 135.3, 135.2, 130.4, 129.8, 129.0, 128.7, 128.6, 26.6 ppm;  $^{77}\text{Se}$  NMR (95.5 MHz,  $\text{CDCl}_3$ )  $\delta$  433.11 ppm.

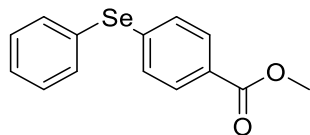

**4-Methoxycarbonylphenyl phenyl selenide 3ai**<sup>[6]</sup>: Yield: 95% (111 mg); White solid, m.p. 69-72 °C; <sup>1</sup>H NMR (500 MHz, CDCl<sub>3</sub>) δ 7.88-7.86 (m, 2H), 7.59-7.57 (m, 2H), 7.39-7.33 (m, 5H), 3.89 (s, 3H) ppm; <sup>13</sup>C NMR (125 MHz, CDCl<sub>3</sub>) δ 166.9, 139.8, 135.1, 130.5, 130.3, 129.8, 128.9, 128.6, 128.4, 52.2 ppm; <sup>77</sup>Se NMR (95.5 MHz, CDCl<sub>3</sub>) δ 431.88 ppm.

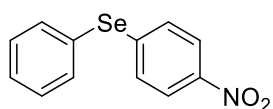

**4-Nitrophenyl phenyl selenide 3ak**<sup>[6]</sup>: Yield: 92% (102 mg); Yellow solid, m.p. 56-58 °C; <sup>1</sup>H NMR (500 MHz, CDCl<sub>3</sub>) δ 8.03-8.01 (m, 2H), 7.46-7.43 (m, 2H), 7.41-7.39 (m, 3H), 7.36-7.33 (m, 2H) ppm; <sup>13</sup>C NMR (125 MHz, CDCl<sub>3</sub>) δ 146.3, 144.1, 136.0, 130.2, 129.8, 129.5, 127.3, 124.1 ppm; <sup>77</sup>Se NMR (95.5 MHz, CDCl<sub>3</sub>) δ 445.16 ppm.

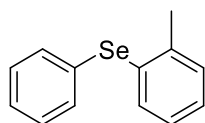

**2-Methylphenyl phenyl selenide 3al**<sup>[6]</sup>: Yield: 96% (95 mg); Yellow oil; <sup>1</sup>H NMR (500 MHz, CDCl<sub>3</sub>) δ 7.40-7.38 (m, 2H), 7.33 (dd, *J* = 7.8, 1.3 Hz, 1H), 7.28-7.19 (m, 5H), 7.06 (dt, *J* = 7.5, 1.8 Hz, 1H), 2.39 (s, 3H) ppm; <sup>13</sup>C NMR (125 MHz, CDCl<sub>3</sub>) δ 140.0, 133.8, 132.9, 131.9, 130.9, 130.4, 129.5, 127.9, 127.3, 126.9, 22.5 ppm; <sup>77</sup>Se NMR (95.5 MHz, CDCl<sub>3</sub>) δ 380.16 ppm.

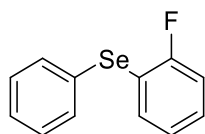

**2-Fluorophenyl phenyl selenide 3am**<sup>[6]</sup>: Yield: 93% (93 mg); Yellow oil; <sup>1</sup>H NMR (500 MHz, CDCl<sub>3</sub>) δ 7.53-7.51 (m, 2H), 7.33-7.28 (m, 3H), 7.26-7.21 (m, 2H), 7.06 (td, *J* = 8.5, 1.3 Hz, 1H), 7.00 (td, *J* =

7.6, 1.3 Hz, 1H) ppm;  $^{13}\text{C}$  NMR (125 MHz,  $\text{CDCl}_3$ )  $\delta$  161.1 (d,  $J = 243.7$  Hz), 134.2, 134.0 (d,  $J = 2.7$  Hz), 129.6, 129.3 (d,  $J = 7.6$  Hz), 128.8 (d,  $J = 1.6$  Hz), 128.1, 125.0 (d,  $J = 3.5$  Hz), 118.7 (d,  $J = 22.0$  Hz), 115.6 (d,  $J = 23.1$  Hz) ppm;  $^{77}\text{Se}$  NMR (95.5 MHz,  $\text{CDCl}_3$ )  $\delta$  351.05 ppm,  $^{19}\text{F}$  NMR (376 MHz,  $\text{CDCl}_3$ )  $\delta$  -103.90 ppm.

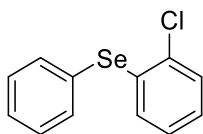

**2-Chlorophenyl phenyl selenide 3an**<sup>[6]</sup>: Yield: 95% (102 mg); Yellow oil;  $^1\text{H}$  NMR (500 MHz,  $\text{CDCl}_3$ )  $\delta$  7.62-7.60 (m, 2H), 7.40-7.31 (m, 4H), 7.09 (td,  $J = 7.6, 1.6$  Hz, 1H), 7.00 (td,  $J = 7.6, 1.4$  Hz, 1H), 6.961 (dd,  $J = 7.9, 1.6$  Hz, 1H) ppm;  $^{13}\text{C}$  NMR (125 MHz,  $\text{CDCl}_3$ )  $\delta$  136.2, 134.0, 133.7, 130.9, 129.9, 129.6, 129.0, 128.1, 127.44, 127.43 ppm;  $^{77}\text{Se}$  NMR (95.5 MHz,  $\text{CDCl}_3$ )  $\delta$  417.00 ppm.

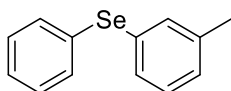

**3-Methylphenyl phenyl selenide 3ao**<sup>[6]</sup>: Yield: 95% (94 mg); Yellow oil;  $^1\text{H}$  NMR (500 MHz,  $\text{CDCl}_3$ )  $\delta$  7.46-7.43 (m, 2H), 7.32 (s, 1H), 7.27-7.24 (m, 4H), 7.16 (t,  $J = 7.6$  Hz, 1H), 7.08 (d,  $J = 7.5$  Hz, 1H), 2.30 (s, 3H) ppm;  $^{13}\text{C}$  NMR (125 MHz,  $\text{CDCl}_3$ )  $\delta$  139.3, 133.9, 132.9, 131.5, 130.8, 130.4, 129.4, 129.3, 128.4, 127.3, 21.4 ppm;  $^{77}\text{Se}$  NMR (95.5 MHz,  $\text{CDCl}_3$ )  $\delta$  424.33 ppm.

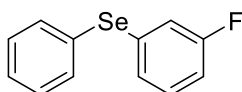

**3-Fluorophenyl phenyl selenide 3ap**<sup>[6]</sup>: Yield: 91% (91 mg); Yellow oil;  $^1\text{H}$  NMR (500 MHz,  $\text{CDCl}_3$ )  $\delta$  7.34-7.30 (m, 2H), 7.22-7.17 (m, 3H), 7.09 (d,  $J = 7.4$  Hz, 1H), 6.91 (t,  $J = 8.1$  Hz, 1H) ppm;  $^{13}\text{C}$  NMR (125 MHz,  $\text{CDCl}_3$ )  $\delta$  163.6 (d,  $J = 206.2$  Hz), 134.3, 133.9 (d,  $J = 6.9$  Hz), 130.5 (d,  $J = 8.1$  Hz), 129.8, 129.7, 128.2, 127.6 (d,  $J = 3.0$  Hz), 118.9 (d,  $J = 22.6$  Hz), 114.1 (d,  $J = 21.2$  Hz) ppm;  $^{77}\text{Se}$  NMR (95.5 MHz,  $\text{CDCl}_3$ )  $\delta$  431.59 ppm,  $^{19}\text{F}$  NMR (376 MHz,  $\text{CDCl}_3$ )  $\delta$  -111.81 ppm.

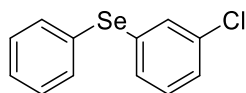

**3-Chlorophenyl phenyl selenide 3aq**<sup>[6]</sup>: Yield: 93% (100 mg); Yellow oil; <sup>1</sup>H NMR (500 MHz, CDCl<sub>3</sub>)  $\delta$  7.53-7.49 (m, 2H), 7.39 (t,  $J$  = 1.8 Hz, 1H), 7.32-7.27 (m, 4H), 7.22-7.15 (m, 2H) ppm; <sup>13</sup>C NMR (125 MHz, CDCl<sub>3</sub>)  $\delta$  135.1, 134.1, 133.6, 131.9, 130.4, 130.3, 129.9, 129.7, 128.2, 127.4 ppm; <sup>77</sup>Se NMR (95.5 MHz, CDCl<sub>3</sub>)  $\delta$  431.76 ppm.

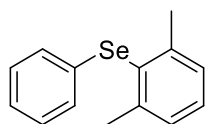

**2,6-Dimethylphenyl phenyl selenide 3ar**<sup>[6]</sup>: Yield: 86% (90 mg); Yellow oil; <sup>1</sup>H NMR (500 MHz, CDCl<sub>3</sub>)  $\delta$  7.24-7.20 (m, 1H), 7.17-7.14 (m, 4H), 7.12-7.07 (m, 3H), 2.48 (s, 6H) ppm; <sup>13</sup>C NMR (125 MHz, CDCl<sub>3</sub>)  $\delta$  143.8, 133.2, 130.4, 129.19, 129.17, 128.7, 128.0, 125.5, 24.4 ppm; <sup>77</sup>Se NMR (95.5 MHz, CDCl<sub>3</sub>)  $\delta$  305.15 ppm.

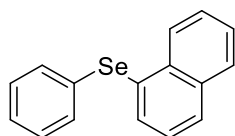

**Naphthalen-1-yl phenyl selenide 3as**<sup>[6]</sup>: Yield: 90% (102 mg); White solid, m.p. 50-53 °C; <sup>1</sup>H NMR (500 MHz, CDCl<sub>3</sub>)  $\delta$  8.34-8.32 (m, 1H), 7.84-7.82 (m, 2H), 7.60 (dd,  $J$  = 7.1, 1.2 Hz, 1H), 7.50-7.48 (m, 2H), 7.37-7.32 (m, 3H), 7.21-7.16 (m, 3H) ppm; <sup>13</sup>C NMR (125 MHz, CDCl<sub>3</sub>)  $\delta$  134.3, 134.2, 134.0, 131.9, 131.8, 129.6, 129.4, 129.3, 128.7, 127.8, 127.1, 126.9, 126.5, 126.2 ppm; <sup>77</sup>Se NMR (95.5 MHz, CDCl<sub>3</sub>)  $\delta$  358.46 ppm.

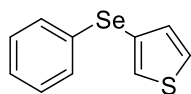

**Phenyl thiophen-3-yl selenide 3at**<sup>[6]</sup>: Yield: 95% (91 mg); Yellow oil; <sup>1</sup>H NMR (500 MHz, CDCl<sub>3</sub>)  $\delta$  7.58 (dd,  $J$  = 2.8, 1.2 Hz, 1H), 7.57-7.55 (m, 2H), 7.58 (dd,  $J$  = 4.8, 2.8 Hz, 1H), 7.26-7.21 (m, 2H),

7.19-7.15 (m, 2H) ppm;  $^{13}\text{C}$  NMR (125 MHz,  $\text{CDCl}_3$ )  $\delta$  132.8, 132.3, 131.0, 129.2, 126.83, 126.75, 122.7 ppm;  $^{77}\text{Se}$  NMR (95.5 MHz,  $\text{CDCl}_3$ )  $\delta$  336.64 ppm.

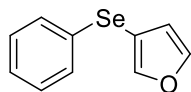

**Furan-3-yl phenyl selenide 3au**<sup>[6]</sup>: Yield: 96% (86 mg); Yellow oil;  $^1\text{H}$  NMR (500 MHz,  $\text{CDCl}_3$ )  $\delta$  7.58 (s, 1H), 7.52-7.50 (m, 2H), 7.44 (t,  $J = 1.6$  Hz, 1H), 7.21-7.18 (m, 1H), 7.16-7.13 (m, 2H), 6.58 (d,  $J = 1.7$  Hz, 1H) ppm;  $^{13}\text{C}$  NMR (125 MHz,  $\text{CDCl}_3$ )  $\delta$  146.8, 144.0, 131.6, 130.0, 129.2, 127.7, 126.4, 115.7 ppm;  $^{77}\text{Se}$  NMR (95.5 MHz,  $\text{CDCl}_3$ )  $\delta$  246.83 ppm.

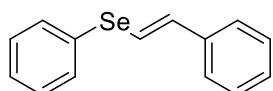

**(E)-Styryl phenyl selenide 3aw**<sup>[7]</sup>: Yield: 94% (97 mg); Yellow oil;  $^1\text{H}$  NMR (500 MHz,  $\text{CDCl}_3$ )  $\delta$  7.54-7.52 (m, 2H), 7.32-7.25 (m, 7H), 7.23-7.20 (m, 1H), 7.16 (d,  $J = 15.8$  Hz, 1H), 6.86 (d,  $J = 15.8$  Hz, 1H) ppm;  $^{13}\text{C}$  NMR (125 MHz,  $\text{CDCl}_3$ )  $\delta$  137.1, 135.2, 132.6, 130.2, 129.4, 128.7, 127.7, 127.5, 126.1, 119.5 ppm;  $^{77}\text{Se}$  NMR (95.5 MHz,  $\text{CDCl}_3$ )  $\delta$  392.10 ppm.

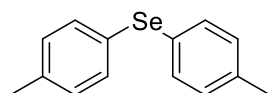

**Bis(4-methylphenyl)selenide 3bb**<sup>[6]</sup>: Yield: 92% (96 mg); Yellow solid, m.p. 48-53 °C;  $^1\text{H}$  NMR (500 MHz,  $\text{CDCl}_3$ )  $\delta$  7.34 (d,  $J = 8.0$  Hz, 4H), 7.05 (d,  $J = 7.9$  Hz, 4H), 2.30 (s, 6H) ppm;  $^{13}\text{C}$  NMR (125 MHz,  $\text{CDCl}_3$ )  $\delta$  137.3, 133.1, 130.2, 127.9, 21.2 ppm;  $^{77}\text{Se}$  NMR (95.5 MHz,  $\text{CDCl}_3$ )  $\delta$  285.16 ppm.

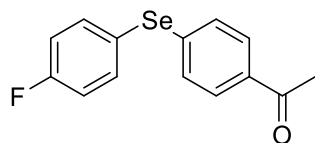

**4-Acetylphenyl 4-fluorophenyl selenide 3ch**<sup>[8]</sup>: Yield: 88% (103 mg); Yellow solid, m.p. 66-71 °C;  $^1\text{H}$  NMR (500 MHz,  $\text{CDCl}_3$ )  $\delta$  7.0 (d,  $J = 8.5$  Hz, 2H), 7.51-7.48 (m, 2H), 7.39-7.36 (m, 2H), 7.32-7.30 (m,



2H), 2.55 (s, 3H) ppm;  $^{13}\text{C}$  NMR (125 MHz,  $\text{CDCl}_3$ )  $\delta$  197.2, 163.2 (d,  $J = 247.5$  Hz), 140.4, 137.6 (d,  $J = 8.7$  Hz), 135.2, 129.8, 128.9, 122.9 (d,  $J = 3.7$  Hz), 117.0 (d,  $J = 22.5$  Hz), 26.9 ppm;  $^{77}\text{Se}$  NMR (95.5 MHz,  $\text{CDCl}_3$ )  $\delta$  424.85 ppm,  $^{19}\text{F}$  NMR (376 MHz,  $\text{CDCl}_3$ )  $\delta$  -111.87 ppm.

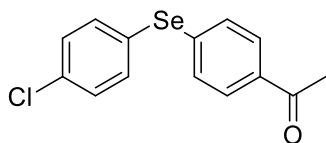

**4-Acetylphenyl 4-chlorophenyl selenide 3dh**<sup>[9]</sup>: Yield: 86% (107 mg); Yellow solid, m.p. 60-64 °C.  $^1\text{H}$  NMR (500 MHz,  $\text{CDCl}_3$ )  $\delta$  7.81 (d,  $J = 8.5$  Hz, 2H), 7.50 (d,  $J = 8.5$  Hz, 2H), 7.39 (d,  $J = 8.4$  Hz, 2H), 7.35-7.26 (m, 2H), 2.57 (s, 3H) ppm;  $^{13}\text{C}$  NMR (125 MHz,  $\text{CDCl}_3$ )  $\delta$  198.3, 139.4, 136.2, 135.5, 135.0, 130.6, 129.9, 129.0, 126.9, 27.4 ppm;  $^{77}\text{Se}$  NMR (95.5 MHz,  $\text{CDCl}_3$ )  $\delta$  428.43 ppm.

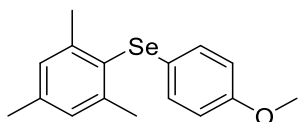

**Mesityl 4-methoxyphenyl selenide 3ea**<sup>[6]</sup>: Yield: 90% (110 mg); White solid, m.p. 60-64 °C,  $^1\text{H}$  NMR (500 MHz,  $\text{CDCl}_3$ )  $\delta$  7.07-7.04 (m, 2H), 6.95 (s, 2H), 6.72-6.69 (m, 2H), 3.70 (s, 3H), 2.43 (s, 6H), 2.27 (s, 3H) ppm;  $^{13}\text{C}$  NMR (125 MHz,  $\text{CDCl}_3$ )  $\delta$  158.1, 143.2, 138.7, 130.7, 128.8, 127.9, 123.2, 114.9, 55.2, 24.3, 21.0 ppm;  $^{77}\text{Se}$  NMR (95.5 MHz,  $\text{CDCl}_3$ )  $\delta$  285.02 ppm.

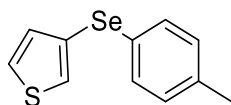

**4-Methylphenyl thiophen-3-yl selenide 3fb**<sup>[6]</sup>: Yield: 94% (95 mg); Yellow oil;  $^1\text{H}$  NMR (500 MHz,  $\text{CDCl}_3$ )  $\delta$  7.33 (dd,  $J = 3.0, 1.2$  Hz, 1H), 7.30-7.26 (m, 3H), 7.06-7.03 (m, 3H), 2.29 (s, 3H) ppm;  $^{13}\text{C}$  NMR (125 MHz,  $\text{CDCl}_3$ )  $\delta$  137.0, 132.3, 131.9, 130.1, 128.03, 128.00, 126.6, 123.6, 21.1 ppm;  $^{77}\text{Se}$  NMR (95.5 MHz,  $\text{CDCl}_3$ )  $\delta$  333.92 ppm.

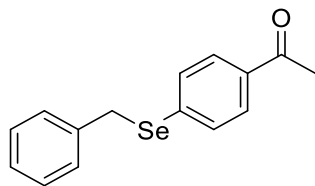

**Benzyl 4-acetylphenyl selenide 3gh**<sup>[10]</sup>: Yield: 92% (106 mg); White solid, m.p. 103-106 °C; <sup>1</sup>H NMR (500 MHz, CDCl<sub>3</sub>) δ 7.81-7.78 (m, 2H), 7.49-7.46 (m, 2H), 7.27-7.21 (m, 5H), 4.19 (s, 2H), 2.56 (s, 3H) ppm; <sup>13</sup>C NMR (125 MHz, CDCl<sub>3</sub>) δ 197.4, 138.6, 137.6, 135.4, 131.4, 128.9, 128.7, 128.6, 127.2, 31.4, 26.5 ppm; <sup>77</sup>Se NMR (95.5 MHz, CDCl<sub>3</sub>) δ 377.05 ppm.

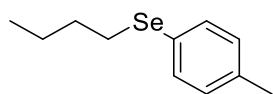

**n-Butyl 4-methylphenyl selenide 3hb**<sup>[6]</sup>: Yield: 91% (83 mg); Yellow oil; <sup>1</sup>H NMR (500 MHz, CDCl<sub>3</sub>) δ 7.39 (d, *J* = 7.7 Hz, 2H), 7.06 (d, *J* = 7.7 Hz, 2H), 2.86 (t, *J* = 7.5 Hz, 2H), 2.31 (s, 3H), 1.66 (quint, *J* = 6.3 Hz, 2H), 1.41 (sext, *J* = 6.3 Hz, 2H), 0.89 (t, *J* = 6.3 Hz, 3H) ppm; <sup>13</sup>C NMR (125 MHz, CDCl<sub>3</sub>) δ 136.8, 133.1, 129.9, 126.8, 32.4, 28.1, 23.1, 21.2, 13.7 ppm; <sup>77</sup>Se NMR (95.5 MHz, CDCl<sub>3</sub>) δ 284.07 ppm.

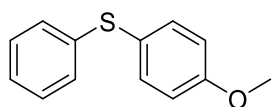

**4-Methoxyphenyl phenyl sulfide 5aa**<sup>[7]</sup>: Yield: 88% (76 mg); Yellow oil; <sup>1</sup>H NMR (500 MHz, CDCl<sub>3</sub>) δ 7.42-7.39 (m, 2H), 7.23-7.20 (m, 2H), 7.17-7.10 (m, 3H), 6.90-6.87 (m, 2H), 3.80 (s, 3H) ppm; <sup>13</sup>C NMR (125 MHz, CDCl<sub>3</sub>) δ 159.9, 138.6, 135.3, 128.94, 128.30, 125.8, 124.4, 115.0, 55.4 ppm.

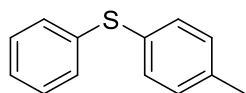

**4-Methylphenyl phenyl sulfide 5ab**<sup>[7]</sup>: Yield: 90% (72 mg); Colorless oil; <sup>1</sup>H NMR (500 MHz, CDCl<sub>3</sub>) δ 7.29 (d, *J* = 8.2 Hz, 2H), 7.27-7.22 (m, 4H), 7.20-7.15 (m, 1H), 7.11 (d, *J* = 8.0 Hz, 2H), 2.32 (s, 3H) ppm; <sup>13</sup>C NMR (125 MHz, CDCl<sub>3</sub>) δ 137.6, 137.2, 132.3, 131.4, 130.1, 129.85, 129.08, 126.5, 21.2

ppm.

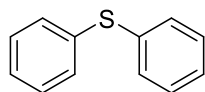

**Diphenyl sulfide 5ac**<sup>[7]</sup>: Yield: 89% (66 mg); Colorless oil; <sup>1</sup>H NMR (500 MHz, CDCl<sub>3</sub>) δ 7.34-7.32 (m, 4H), 7.29-7.25 (m, 4H), 7.23-7.20 (m, 2H) ppm; <sup>13</sup>C NMR (125 MHz, CDCl<sub>3</sub>) δ 135.9, 131.1, 129.2, 127.1 ppm.

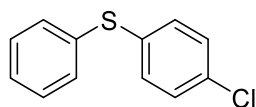

**4-Chlorophenyl phenyl sulfide 5ae**<sup>[7]</sup>: Yield: 80% (71 mg); Colorless oil; <sup>1</sup>H NMR (500 MHz, CDCl<sub>3</sub>) δ 7.32-7.29 (m, 2H), 7.27-7.24 (m, 2H), 7.22-7.20 (m, 1H), 7.19 (s, 4H) ppm; <sup>13</sup>C NMR (125 MHz, CDCl<sub>3</sub>) δ 135.3, 134.8, 133.1, 132.1, 131.4, 129.46, 129.43, 127.5 ppm.

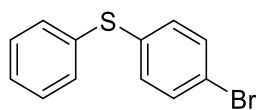

**4-Bromophenyl phenyl sulfide 5af**<sup>[7]</sup>: Yield: 74% (78 mg); Colorless oil; <sup>1</sup>H NMR (500 MHz, CDCl<sub>3</sub>) δ 7.36-7.31 (m 4H), 7.28-7.25 (m, 2H), 7.24-7.20 (m, 1H), 7.13-7.11 (m, 2H) ppm; <sup>13</sup>C NMR (125 MHz, CDCl<sub>3</sub>) δ 135.6, 135.0, 132.33, 132.18, 131.7, 129.5, 127.7, 121.0 ppm.

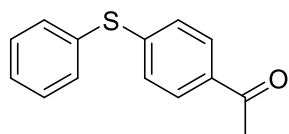

**4-Acetylphenyl phenyl sulfide 5ah**<sup>[11]</sup>: Yield: 75% (68 mg); White solid, m.p. 64-67 °C. <sup>1</sup>H NMR (500 MHz, CDCl<sub>3</sub>) δ 7.81 (d, *J* = 8.4 Hz, 2H), 7.50-7.48 (m, 2H), 7.41-7.38 (m, 3H), 7.21 (d, *J* = 8.5 Hz, 2H), 2.54 (s, 3H) ppm; <sup>13</sup>C NMR (125 MHz, CDCl<sub>3</sub>) δ 197.0, 144.9, 134.6, 133.8, 132.2, 129.7, 128.89, 128.77, 127.5, 26.4 ppm.

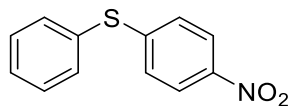

**4-Nitrophenyl phenyl sulfide 5ak**<sup>[12]</sup>: Yield: 51% (47 mg); White solid, m.p. 121-123 °C; <sup>1</sup>H NMR (500 MHz, CDCl<sub>3</sub>) δ 8.06-8.03 (m, 2H), 7.55-7.52 (m, 2H), 7.46-7.44 (m, 3H), 7.18-7.15 (m, 2H) ppm; <sup>13</sup>C NMR (125 MHz, CDCl<sub>3</sub>) δ 148.5, 145.4, 134.7, 130.52, 130.04, 129.7, 126.7, 124.0 ppm.

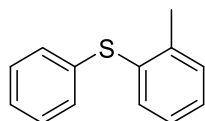

**2-Methylphenyl phenyl sulfide 5al**<sup>[7]</sup>: Yield: 83% (66 mg); Colorless oil; <sup>1</sup>H NMR (500 MHz, CDCl<sub>3</sub>) δ 7.29 (dd, *J* = 7.7, 1.3 Hz, 1H), 7.26-7.22 (m, 3H), 7.21-7.15 (m, 4H), 7.12 (dt, *J* = 7.3, 1.3 Hz, 1H), 2.37 (s, 3H) ppm; <sup>13</sup>C NMR (125 MHz, CDCl<sub>3</sub>) δ 140.0, 136.3, 133.8, 133.1, 130.7, 129.7, 129.2, 128.0, 126.78, 126.39, 20.7 ppm.

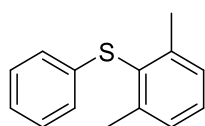

**2,6-Dimethylphenyl phenyl sulfide 5ar**<sup>[12]</sup>: Yield: 57% (49 mg); Colorless oil; <sup>1</sup>H NMR (500 MHz, CDCl<sub>3</sub>) δ 7.24-7.15 (m, 5H), 7.05 (dt, *J* = 7.4, 1.2 Hz, 1H), 6.97-6.86 (m, 2H), 2.42 (s, 6H) ppm; <sup>13</sup>C NMR (125 MHz, CDCl<sub>3</sub>) δ 143.9, 138.1, 130.6, 129.3, 128.9, 128.5, 125.7, 124.6, 21.8 ppm.

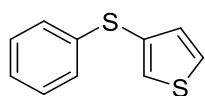

**Phenyl thiophen-3-yl sulfide 5at**<sup>[11]</sup>: Yield: 86% (66 mg); Colorless oil; <sup>1</sup>H NMR (500 MHz, CDCl<sub>3</sub>) δ 7.35-7.32 (m, 2H), 7.24-7.19 (m, 4H), 7.16-7.12 (m, 1H), 7.02 (dd, *J* = 4.9, 1.3 Hz, 1H) ppm; <sup>13</sup>C NMR (125 MHz, CDCl<sub>3</sub>) δ 137.4, 131.31, 129.44, 129.08, 128.52, 128.25, 126.8, 126.2 ppm.

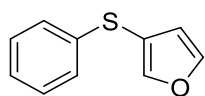

**Furan-3-yl phenyl sulfide 5au**<sup>[13]</sup>: Yield: 73% (51 mg); Colorless oil; <sup>1</sup>H NMR (500 MHz, CDCl<sub>3</sub>) δ 7.61 (s, 1H), 7.50 (s, 1H), 7.26-7.19 (m, 4H), 7.14 (t, *J* = 7.2 Hz, 1H), 6.43 (d, *J* = 0.9 Hz, 1H) ppm; <sup>13</sup>C NMR (125 MHz, CDCl<sub>3</sub>) δ 146.1, 144.2, 137.3, 128.9, 127.3, 125.8, 114.7, 114.0 ppm.

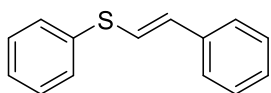

**(E)-Styryl phenyl sulfide 5aw**<sup>[7]</sup>: Yield: 60% (51 mg); Colorless oil; <sup>1</sup>H NMR (500 MHz, CDCl<sub>3</sub>) δ 7.54-7.52 (m, 2H), 7.32-7.19 (m, 8H), 7.16 (d, *J* = 15.8 Hz, 1H), 6.86 (d, *J* = 15.8 Hz, 1H) ppm; <sup>13</sup>C NMR (125 MHz, CDCl<sub>3</sub>) δ 137.1, 135.2, 132.6, 130.3, 129.4, 128.7, 127.72, 127.48, 126.2, 119.5 ppm.

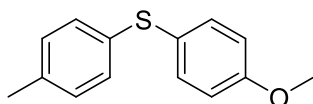

**4-Methoxyphenyl 4-methylphenyl sulfide 5ba**<sup>[11]</sup>: Yield: 87% (80 mg); Colorless oil; <sup>1</sup>H NMR (500 MHz, CDCl<sub>3</sub>) δ 7.36-7.33 (m, 2H), 7.12 (d, *J* = 8.0 Hz, 2H), 7.04 (d, *J* = 8.0 Hz, 2H), 6.86-6.83 (m, 2H), 3.77 (s, 3H), 2.28 (s, 3H) ppm; <sup>13</sup>C NMR (125 MHz, CDCl<sub>3</sub>) δ 159.5, 136.1, 134.40, 134.37, 129.82, 129.46, 125.7, 114.9, 55.4, 21.0.

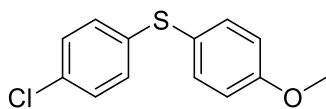

**4-Chlorophenyl 4-methoxyphenyl sulfide 5ca**<sup>[11]</sup>: Yield: 72% (72 mg); White solid, m.p. 59-62 °C; <sup>1</sup>H NMR (500 MHz, CDCl<sub>3</sub>) δ 7.41-7.38 (m, 2H), 7.20-7.17 (m, 2H), 7.08-7.05 (m, 2H), 6.91-6.88 (m, 2H), 3.81 (s, 3H) ppm; <sup>13</sup>C NMR (125 MHz, CDCl<sub>3</sub>) δ 160.1, 137.4, 135.5, 131.6, 129.36, 129.01, 123.8, 115.2, 55.4 ppm.

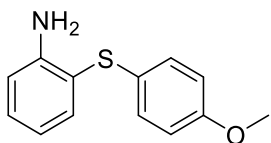

**2-Aminophenyl 4-methoxyphenyl sulfide 5da**<sup>[12]</sup>: Yield: 46% (43 mg); Yellow oil; <sup>1</sup>H NMR (500 MHz,

CDCl<sub>3</sub>)  $\delta$  7.39 (dd,  $J = 7.7, 1.6$  Hz, 1H), 7.16 (dt,  $J = 7.7, 1.6$  Hz, 1H), 7.13-7.10 (m, 2H), 6.80-6.77 (m, 2H), 6.74-6.69 (m, 2H), 4.25 (s, br, 2H), 3.74 (s, 3H) ppm; <sup>13</sup>C NMR (125 MHz, CDCl<sub>3</sub>)  $\delta$  158.4, 148.1, 136.3, 130.4, 129.7, 126.9, 118.7, 116.8, 115.4, 114.8, 55.4 ppm.

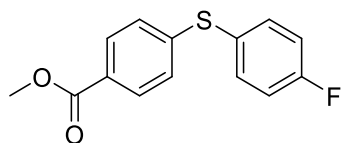

**4-Methoxycarbonylphenyl 4-fluorophenyl sulfide 5ed**<sup>[14]</sup>: Yield: 53% (56 mg); White solid, m.p. 81-85 °C; <sup>1</sup>H NMR (500 MHz, CDCl<sub>3</sub>)  $\delta$  7.88 (d,  $J = 8.6$  Hz, 2H), 7.50-7.46 (m 2H), 7.141-7.07 (m, 4H), 3.88 (s, 3H) ppm; <sup>13</sup>C NMR (125 MHz, CDCl<sub>3</sub>)  $\delta$  166.6, 163.2 (d,  $J = 248.7$  Hz), 144.7, 136.3 (d,  $J = 8.7$  Hz), 130.1, 127.4, 127.2 (d,  $J = 3.7$  Hz), 126.9, 116.9 (d,  $J = 22.5$  Hz), 52.05 ppm, <sup>19</sup>F NMR (376 MHz, CDCl<sub>3</sub>)  $\delta$  -111.58 ppm.

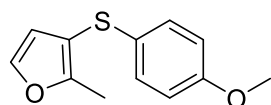

**4-Methoxyphenyl 2-methylfuran-3-yl sulfide 5fa**<sup>[15]</sup>: Yield: 87% (77 mg); Yellow oil; <sup>1</sup>H NMR (500 MHz, CDCl<sub>3</sub>)  $\delta$  7.16 (d,  $J = 2.0$  Hz, 1H), 7.14-7.11 (m, 2H), 6.81-6.78 (m, 2H), 6.32 (d,  $J = 2.0$  Hz, 1H), 3.76 (s, 3H), 2.35 (s, 3H) ppm; <sup>13</sup>C NMR (125 MHz, CDCl<sub>3</sub>)  $\delta$  158.2, 155.7, 141.0, 129.4, 128.3, 115.1, 114.6, 109.8, 55.4, 11.8 ppm.

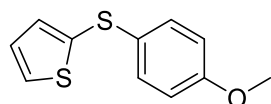

**Thiophen-2-yl 4-methoxyphenyl sulfide 5ga**<sup>[11]</sup>: Yield: 94% (84 mg); Yellow oil; <sup>1</sup>H NMR (500 MHz, CDCl<sub>3</sub>)  $\delta$  7.34 (dd,  $J = 5.4, 1.3$  Hz, 1H), 7.28-7.25 (m, 2H), 7.19 (dd,  $J = 3.6, 1.3$  Hz, 1H), 6.97 (dd,  $J = 5.4, 3.6$  Hz, 1H), 6.81-6.78 (m, 2H), 3.80 (s, 3H) ppm; <sup>13</sup>C NMR (125 MHz, CDCl<sub>3</sub>)  $\delta$  159.0, 134.4, 133.9, 131.2, 130.1, 128.4, 127.7, 114.8, 55.4 ppm.

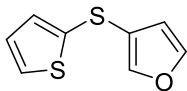

**Furan-3-yl thiophen-2-yl sulfide 5gu:** Yield: 92% (67 mg); Yellow oil;  $^1\text{H}$  NMR (500 MHz,  $\text{CDCl}_3$ )  $\delta$  7.49 (s, 1H), 7.38 (t,  $J = 1.8$  Hz, 1H), 7.31 (dd,  $J = 5.3, 1.3$  Hz, 1H), 7.15 (dd,  $J = 3.6, 1.3$  Hz, 1H), 6.94 (dd,  $J = 5.3, 3.6$  Hz, 1H), 6.40 (dd,  $J = 1.9, 0.8$  Hz, 1H) ppm;  $^{13}\text{C}$  NMR (125 MHz,  $\text{CDCl}_3$ )  $\delta$  143.7, 143.3, 134.3, 132.5, 129.2, 127.5, 118.2, 113.2 ppm. HRMS (EI-TOF)  $m/z$ :  $[\text{M}^+]$  Calculated for  $\text{C}_8\text{H}_6\text{OS}_2$  181.9860, found 181.9859.

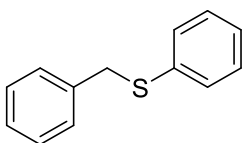

**Benzyl phenyl sulfide 5hc**<sup>[16]</sup>: Yield: 43% (35 mg); Yellow solid, m.p. 41-44 °C;  $^1\text{H}$  NMR (500 MHz,  $\text{CDCl}_3$ )  $\delta$  7.30-7.26 (m, 6H), 7.24-7.20 (m, 3H), 7.17-7.14 (m, 1H), 4.09 (s, 2H) ppm;  $^{13}\text{C}$  NMR (125 MHz,  $\text{CDCl}_3$ )  $\delta$  137.5, 136.5, 129.9, 128.88, 128.87, 128.53, 127.2, 126.4, 39.1 ppm.

## References:

1. D. Singh, A. M. Deobald, L. R. S. Camargo, G. Tabarelli, O. E. D. Rodrigues and A. L Braga, *Org. Lett.*, 2010, **12**, 3288-3291.
2. J. J. Liu, M. M. Tian, Y. X. Li, X. W. Shan, A. K. Li, K. Lu, M. Fagnoni, S. Protti and X. Zhao, *Eur. J. Org. Chem.*, 2020, **2020**, 7358-7367.
3. K. M. N. Win, A. D. Sonawane and M. Koketsu, *Org. Biomol. Chem.*, 2021, **19**, 3199-3206.
4. S. Jana, P. Aseeva and R. M. Koenigs, *Chem. Commun.*, 2019, **55**, 12825-12828.
5. N. Sun, X. N. Zhang, L. Q. Jin, B. X. Hu, Z. L. Shen and X. Q. Hu, *Catal. Commun.*, 2017, **101**, 5-9.
6. N. Sun, K. Zheng, P. Y. Sun, Y. Chen, L. Q. Jin, B. X. Hu, Z. L. Shen and X. Q. Hu, *Adv. Synth. Catal.*, 2021, **363**, 3577-3584.

7. N. Taniguchi, *J. Org. Chem.*, 2007, **72**, 1241-1245.
8. I. P. Beletskaya, A. S. Sigeev, A. S. Peregudov and P. V. Petrovskii, *Tetrahedron Lett.* 2003, **44**, 7039-7041.
9. I. P. Beletskaya, A. S. Sigeev, A. S. Peregudov, P. V. Petrovskii and V. N. Khrustalev, *Chem. Lett.* 2010, **39**, 720-722.
10. L. H. Andrade, A. V. Silva, P. Milani, D. Koszelewski and W. Kroutil, *Org. Biomol. Chem.*, 2010, **8**, 2043-2051.
11. Y. Liu, S. Y. Xing, J. Zhang, W. Liu, Y. N. Xu, Y. Zhang, K. F. Yang, L. Yang, K. Z. Jiang and X. X. Shao, *Org. Chem. Front.*, 2022, **9**, 1375-1382.
12. S. P. Bakare and M. Patil, *New J. Chem.*, 2022, **46**, 6283-6295.
13. Y. Cheng, X. Liu and Z. B. Dong, *Eur. J. Org. Chem.*, 2018, **2018**, 815-820.
14. D. Liu, H. X. Ma, P. Fang and T. S. Mei, *Angew. Chem. Int. Ed.*, 2019, **58**, 5033-5037.
15. J. Y. Zhou, S. W. Tao, R. Q. Liu and Y. M. Zhu, *J. Org. Chem.*, 2019, **84**, 11891-11901.
16. T. Itoh and T. Mase, *Org. Lett.*, 2004, **6**, 4587-4590.



### 3. $^1\text{H}$ NMR and $^{13}\text{C}$ NMR Spectra

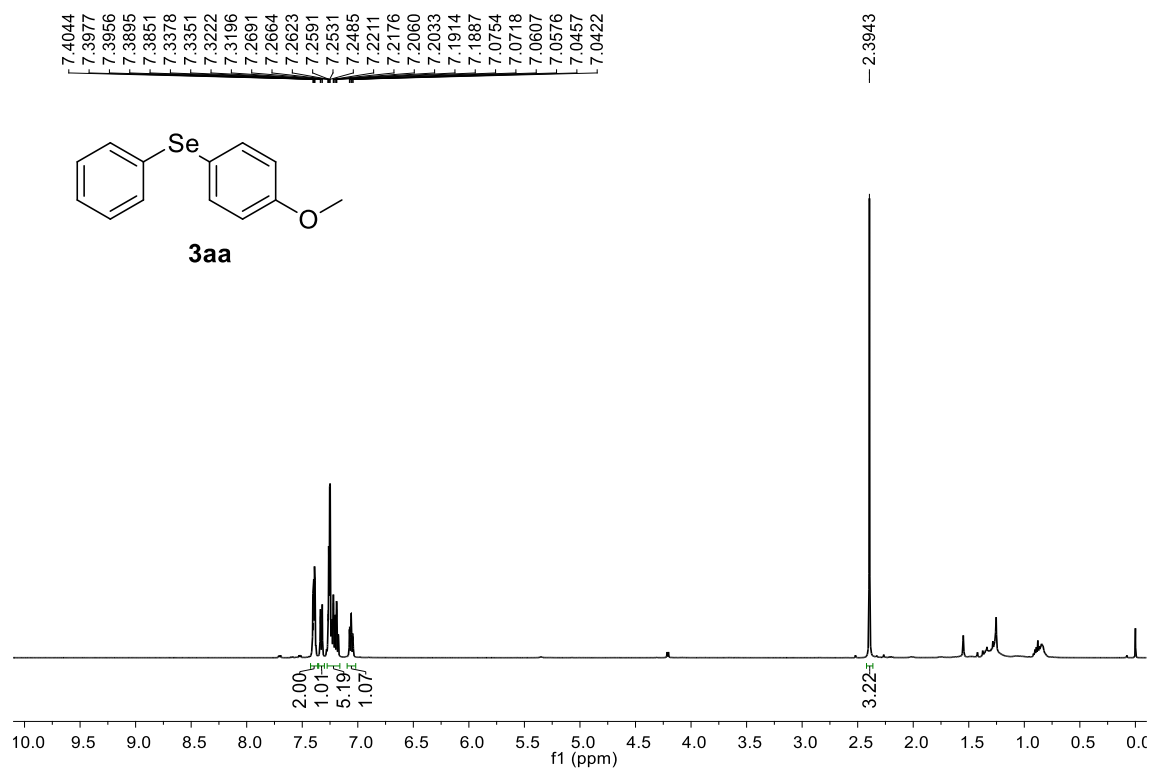

Figure S1  $^1\text{H}$  NMR (500 MHz) spectrum of **3aa** in  $\text{CDCl}_3$

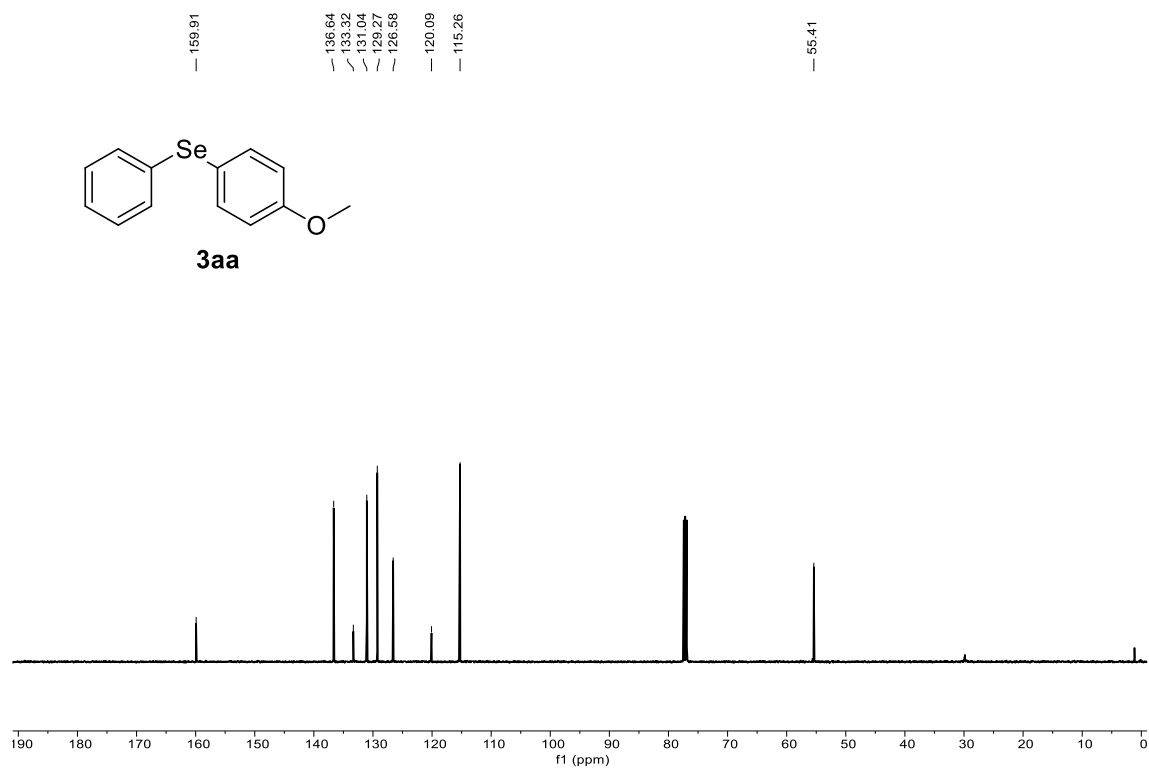

Figure S2  $^{13}\text{C}$  NMR (125 MHz) spectrum of **3aa** in  $\text{CDCl}_3$

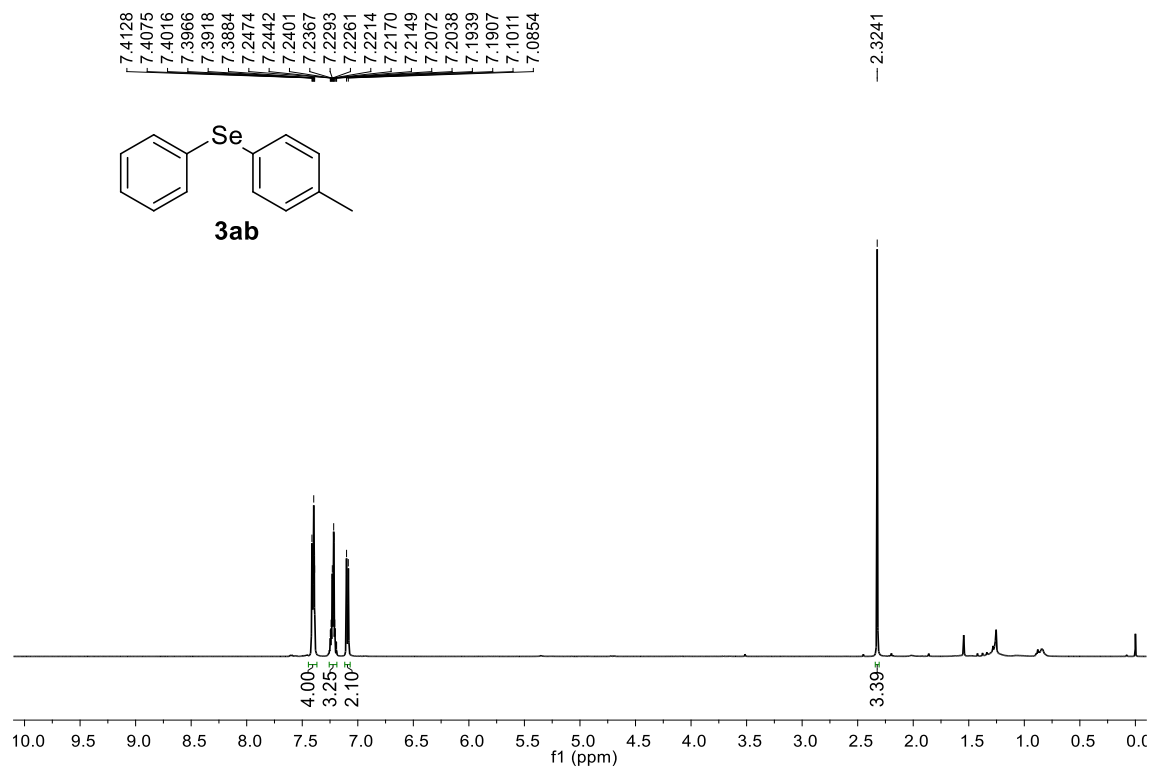

**Figure S3** <sup>1</sup>H NMR (500 MHz) spectrum of **3ab** in CDCl<sub>3</sub>

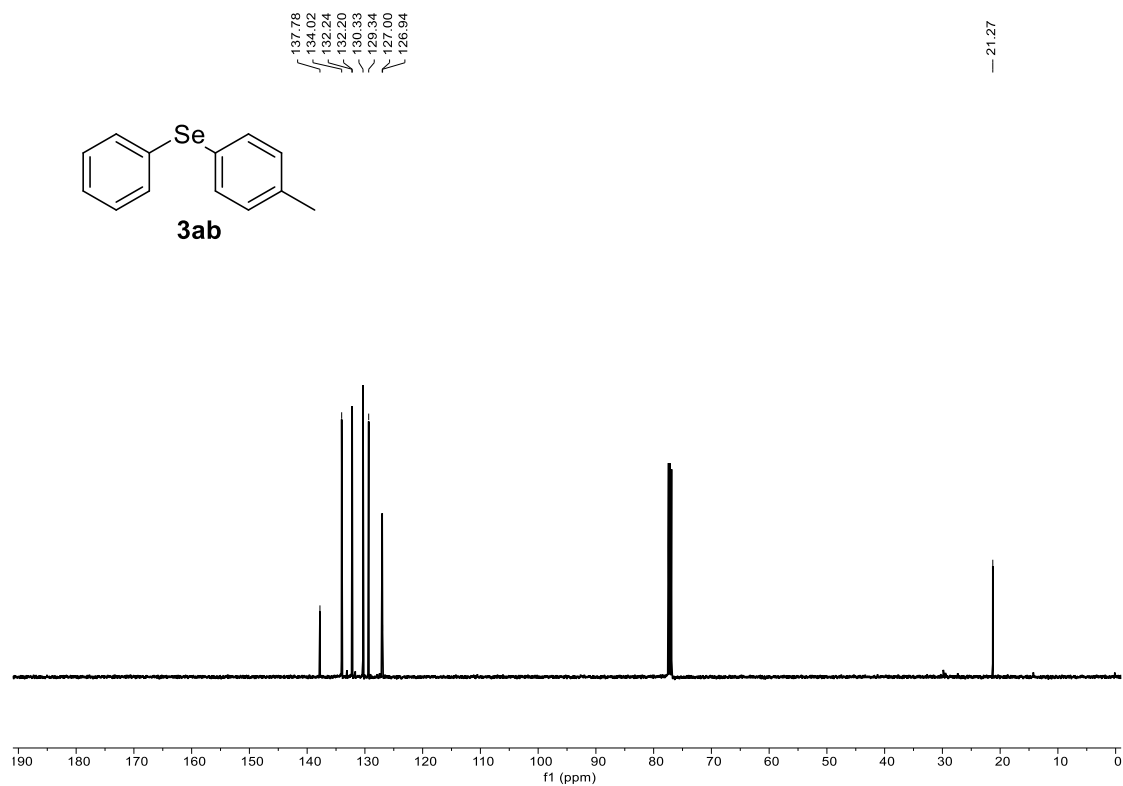

**Figure S4** <sup>13</sup>C NMR (500 MHz) spectrum of **3ab** in CDCl<sub>3</sub>

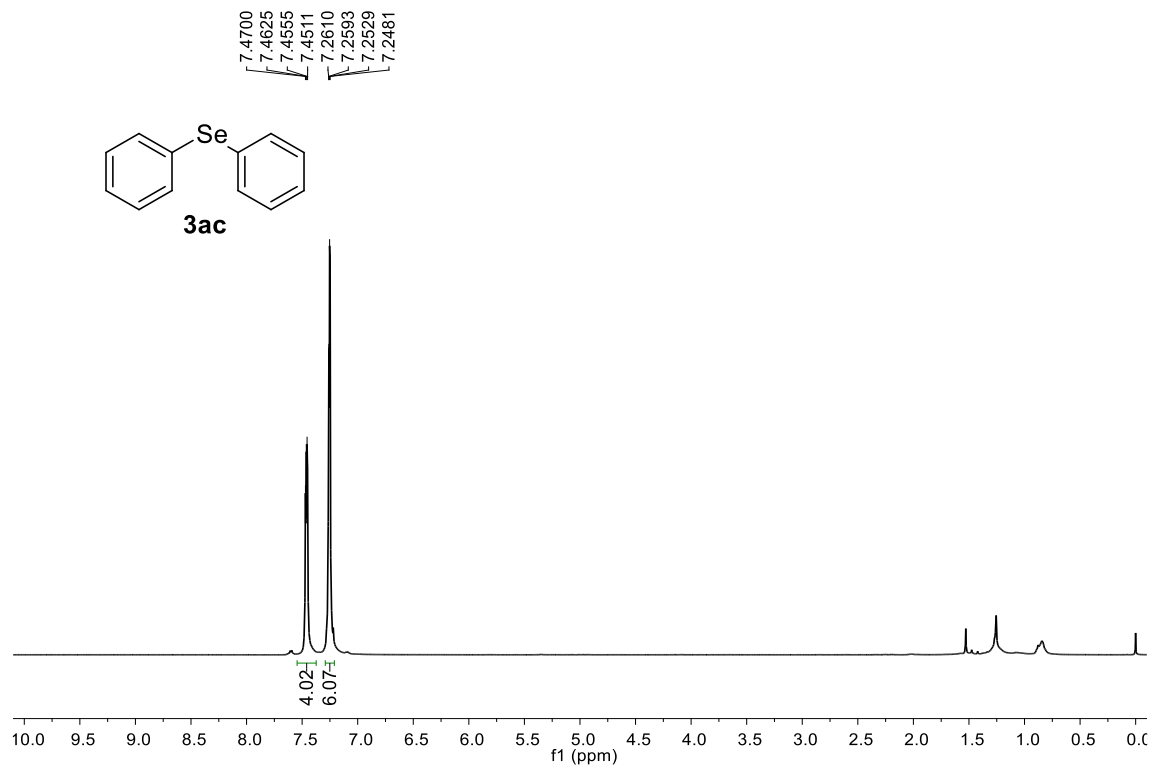

**Figure S5** <sup>1</sup>H NMR (500 MHz) spectrum of **3ac** in CDCl<sub>3</sub>

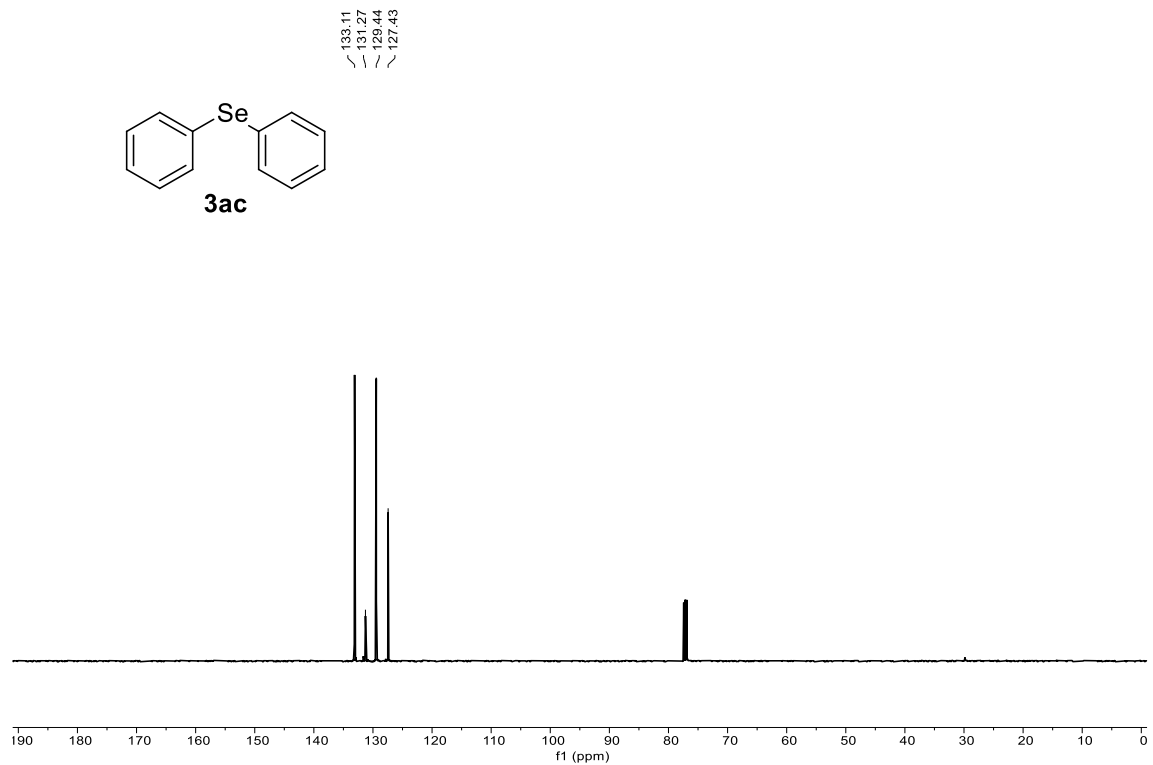

**Figure S6** <sup>13</sup>C NMR (125 MHz) spectrum of **3ac** in CDCl<sub>3</sub>

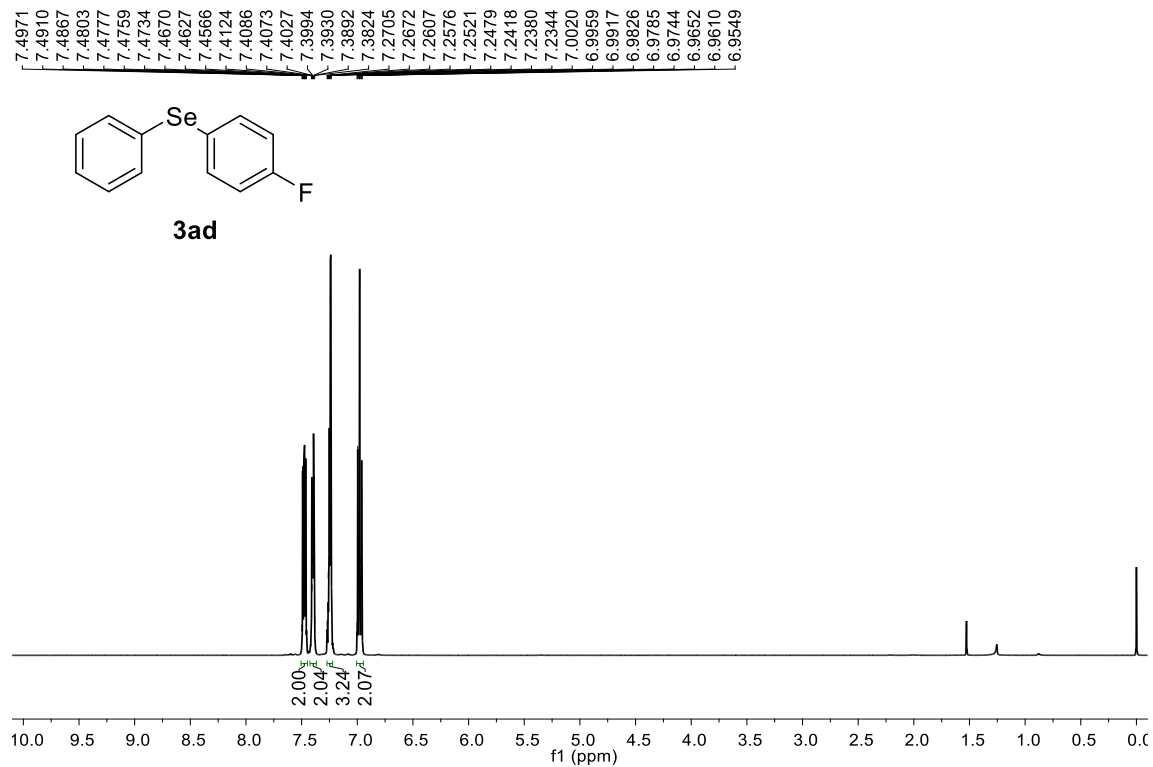

**Figure S7**  $^1\text{H}$  NMR (500 MHz) spectrum of **3ad** in  $\text{CDCl}_3$

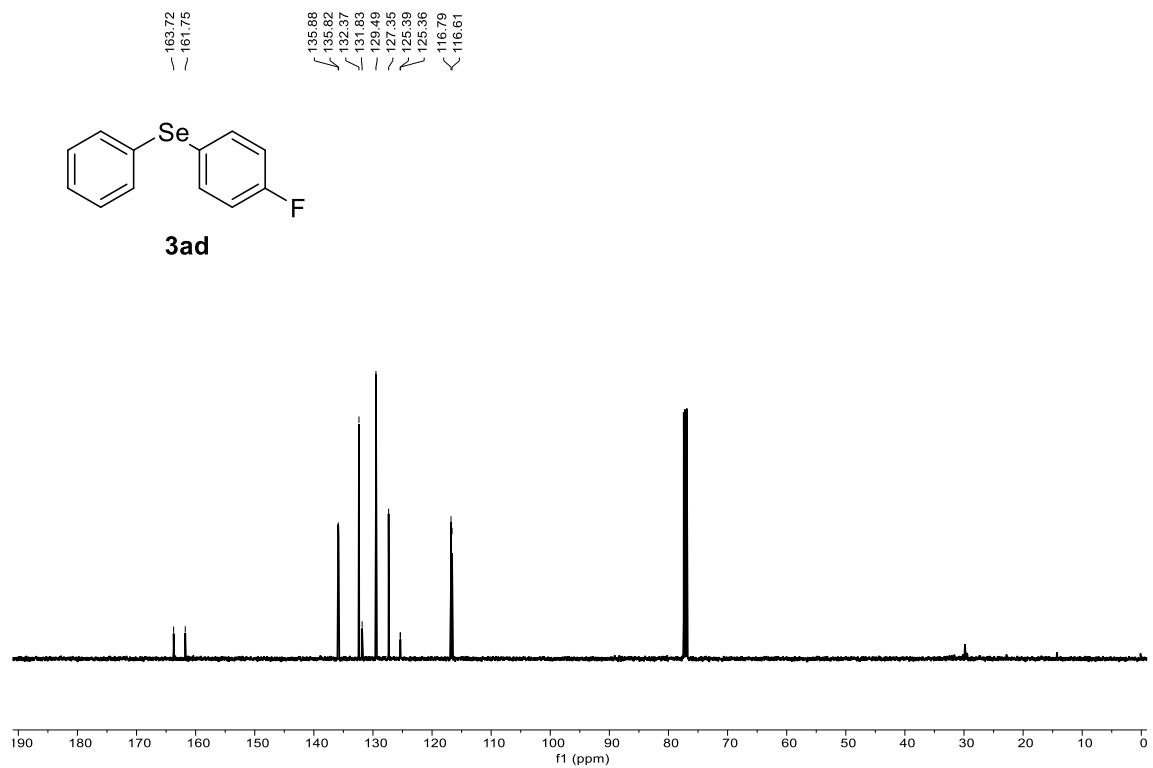

**Figure S8**  $^{13}\text{C}$  NMR (125 MHz) spectrum of **3ad** in  $\text{CDCl}_3$

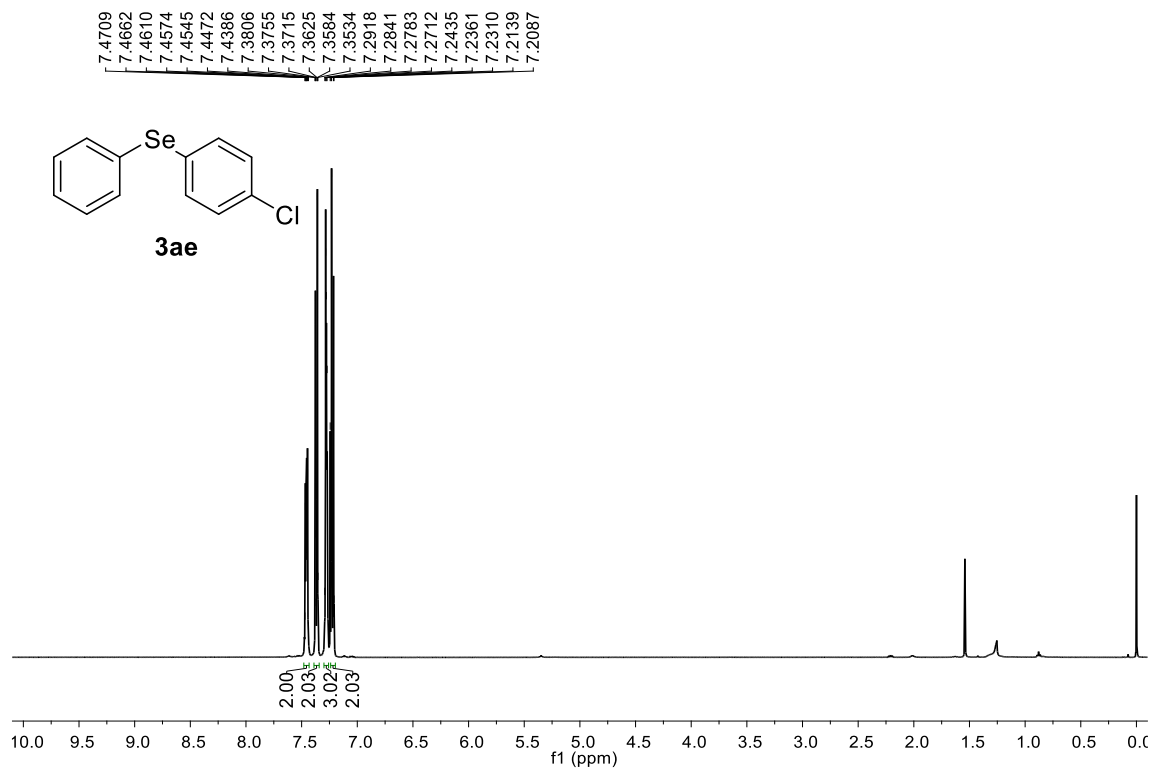

**Figure S9** <sup>1</sup>H NMR (500 MHz) spectrum of **3ae** in CDCl<sub>3</sub>

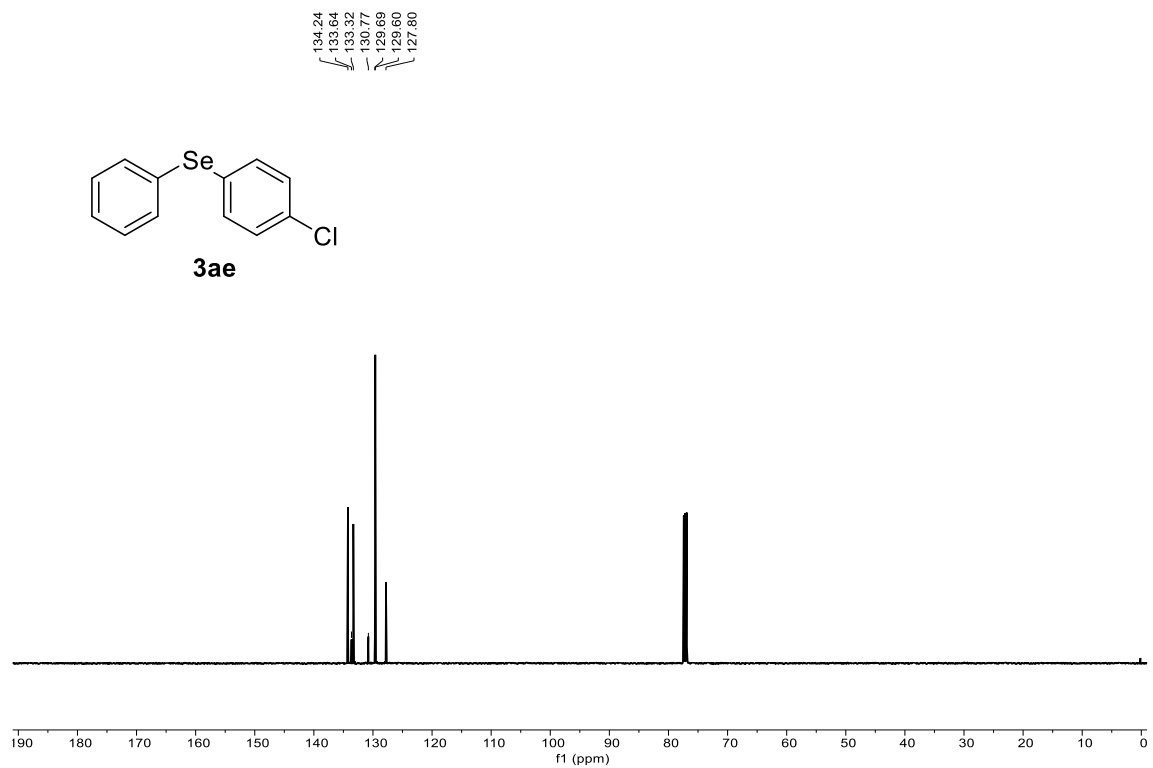

**Figure S10** <sup>13</sup>C NMR (125 MHz) spectrum of **3ae** in CDCl<sub>3</sub>

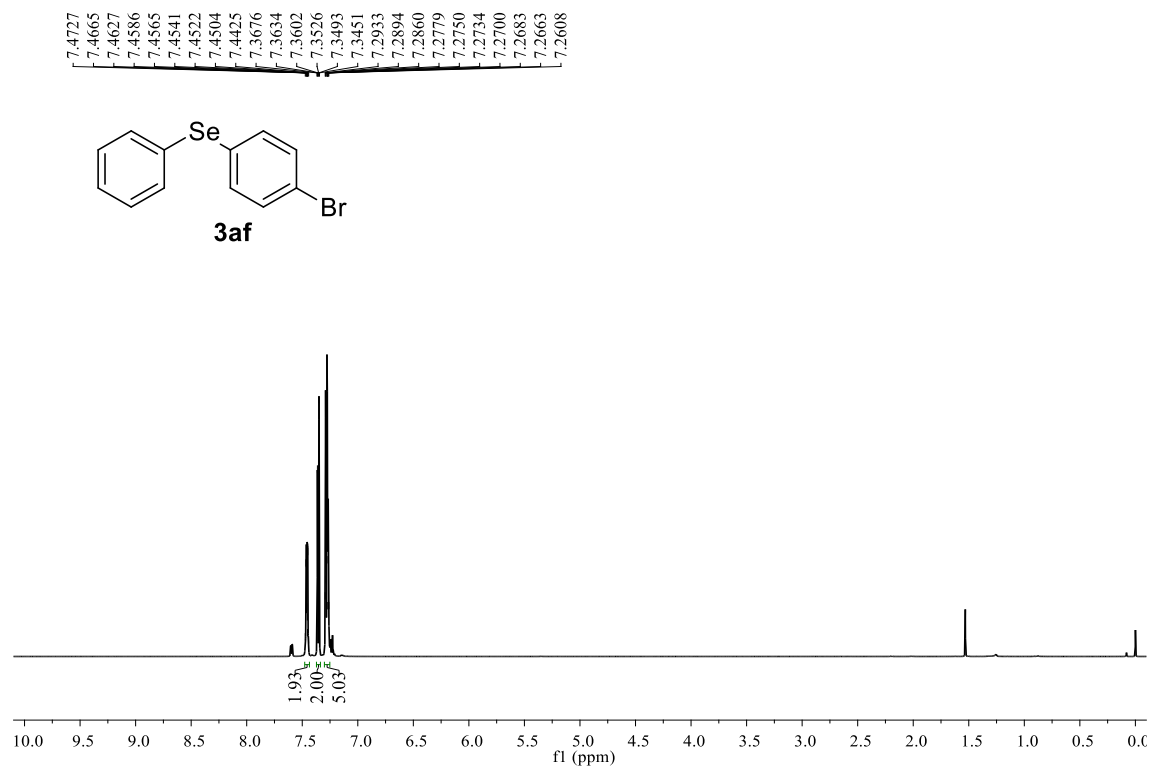

**Figure S11** <sup>1</sup>H NMR (500 MHz) spectrum of **3af** in CDCl<sub>3</sub>

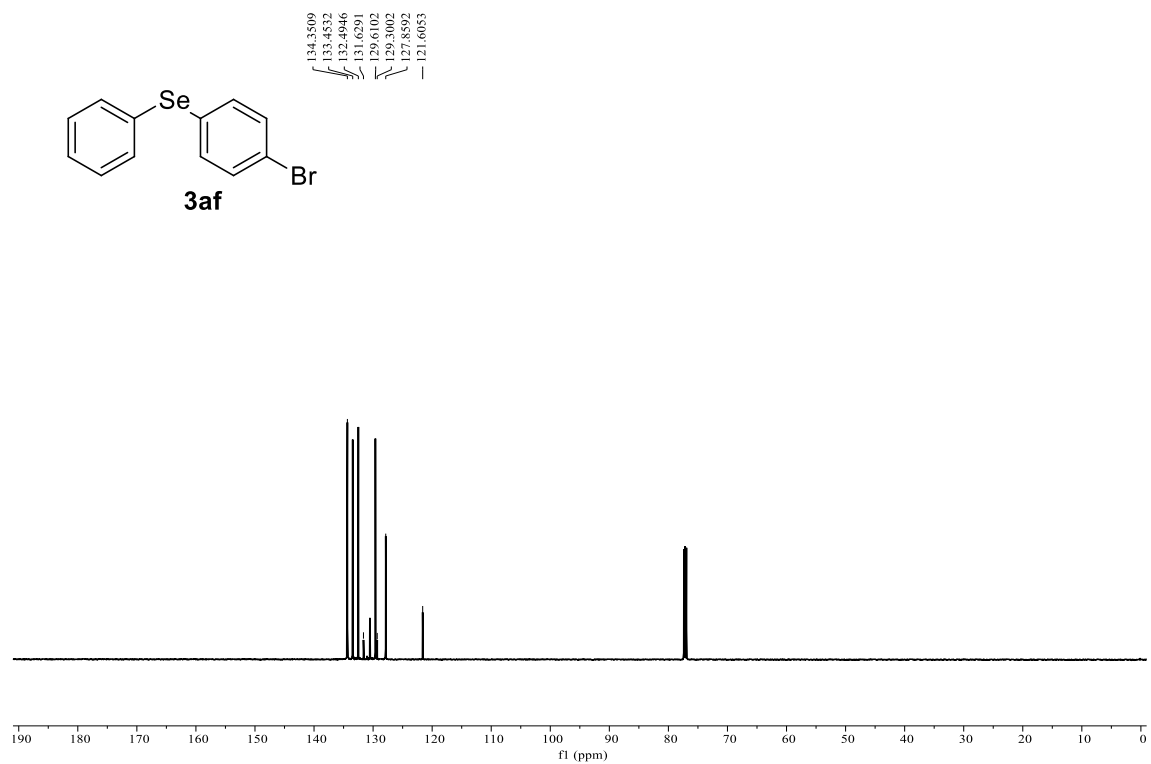

**Figure S12** <sup>13</sup>C NMR (500 MHz) spectrum of **3af** in CDCl<sub>3</sub>

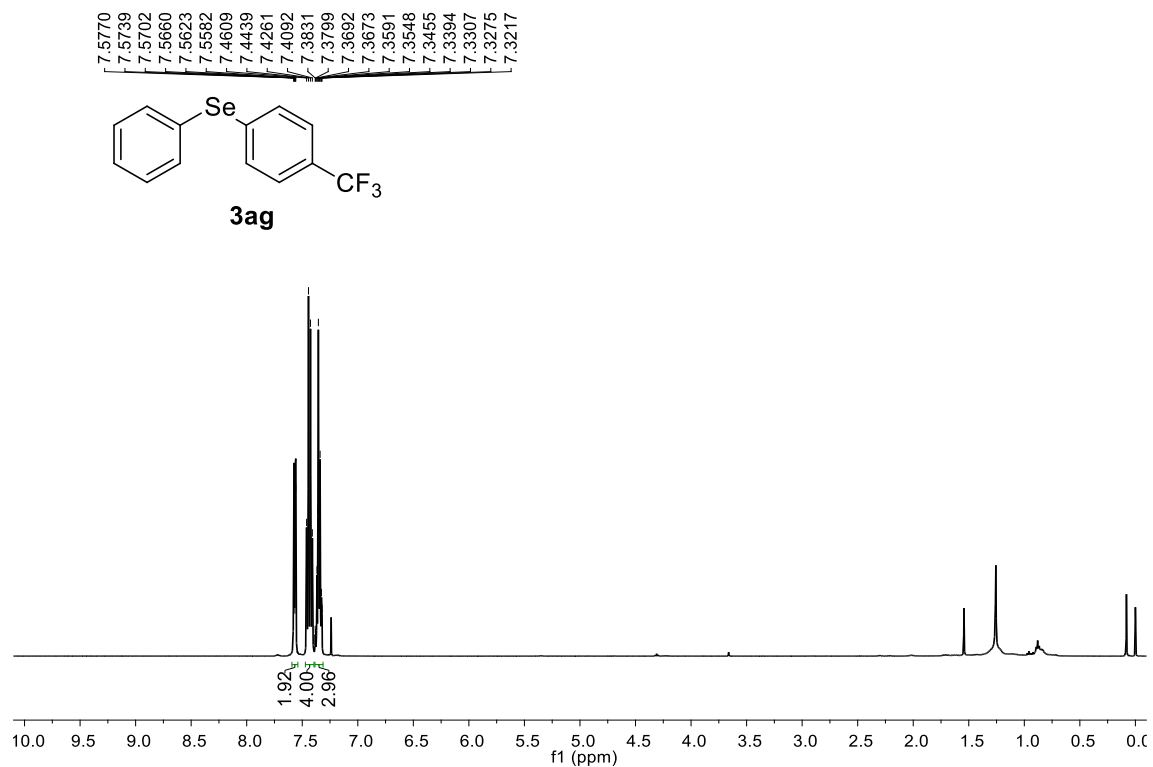

**Figure S13**  $^1\text{H}$  NMR (500 MHz) spectrum of **3ag** in  $\text{CDCl}_3$

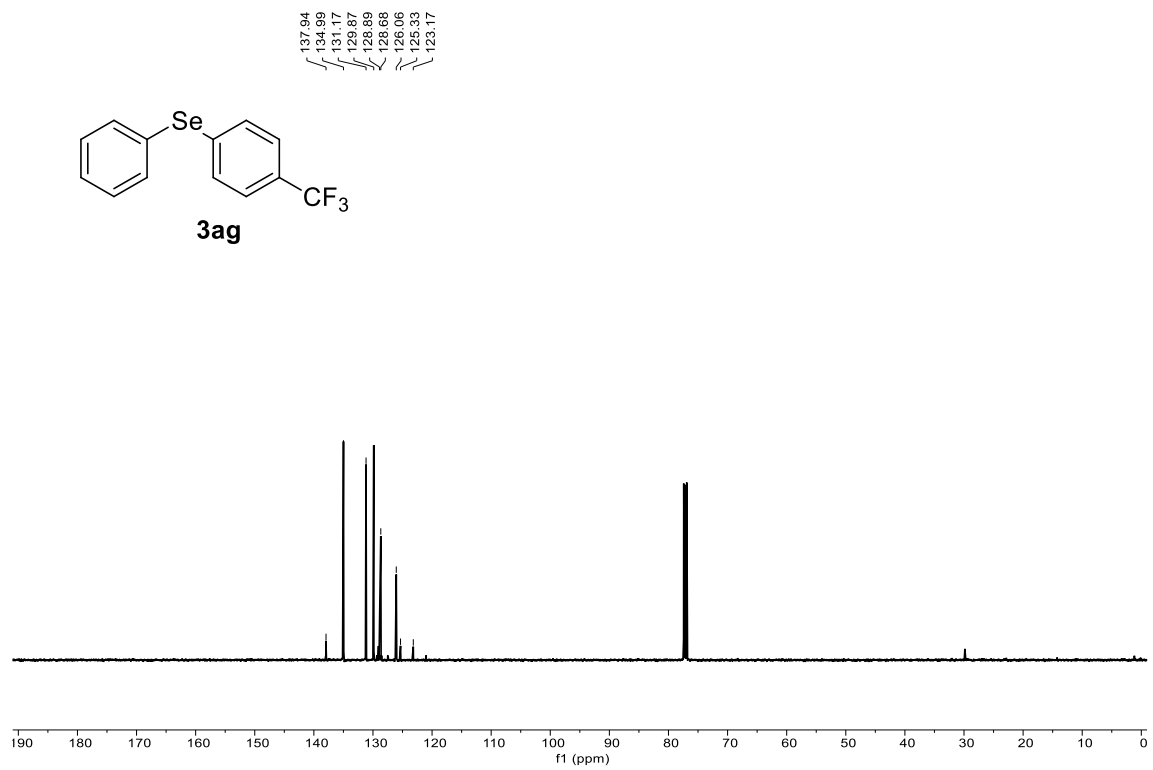

**Figure S14**  $^{13}\text{C}$  NMR (125 MHz) spectrum of **3ag** in  $\text{CDCl}_3$

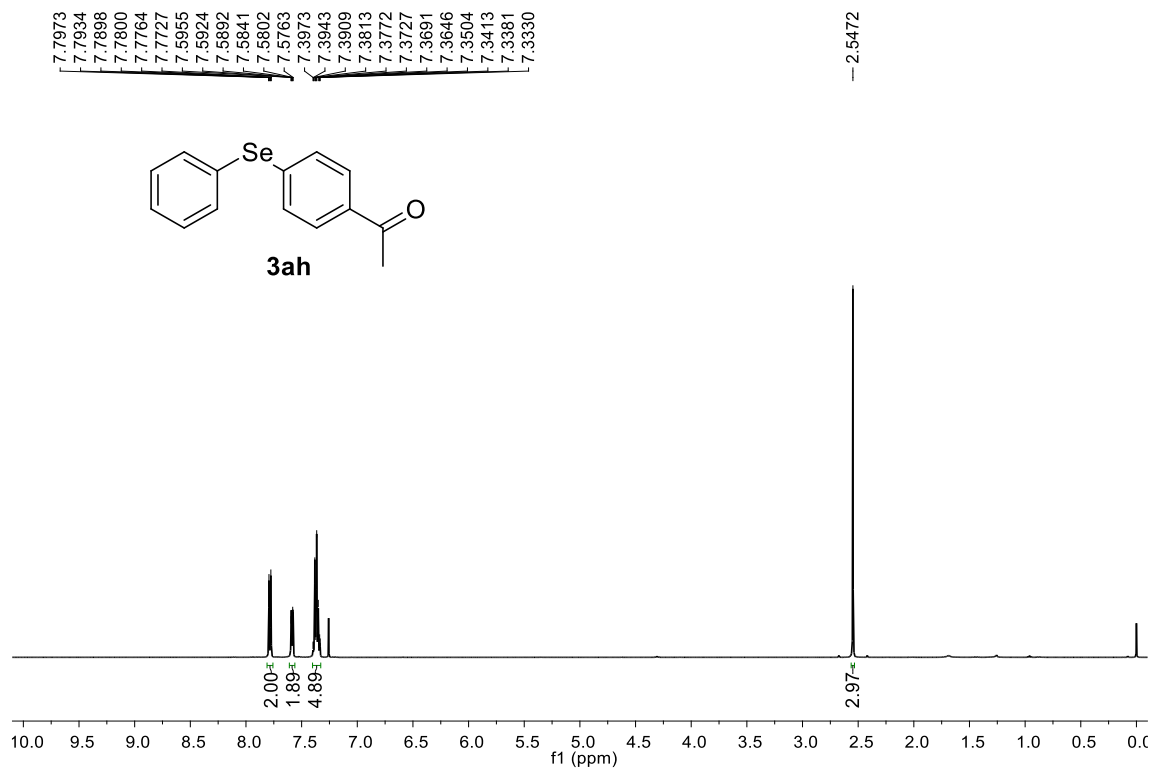

**Figure S15** <sup>1</sup>H NMR (500 MHz) spectrum of **3ah** in CDCl<sub>3</sub>

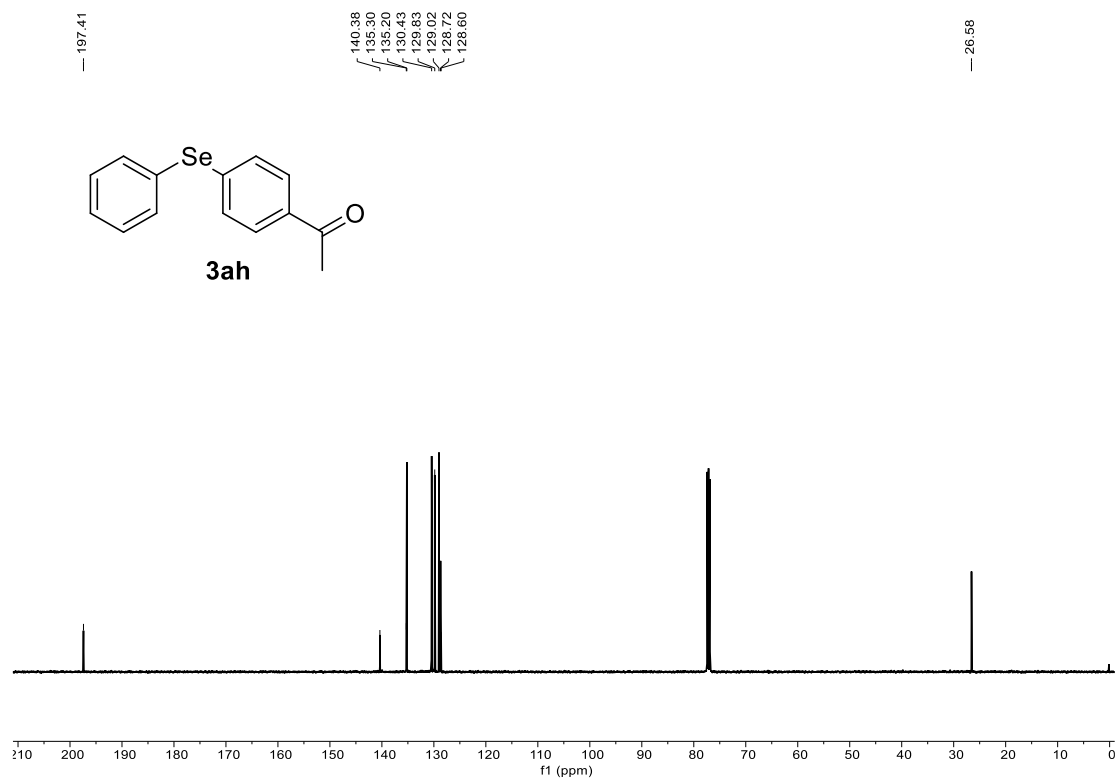

**Figure S16** <sup>13</sup>C NMR (125 MHz) spectrum of **3ah** in CDCl<sub>3</sub>



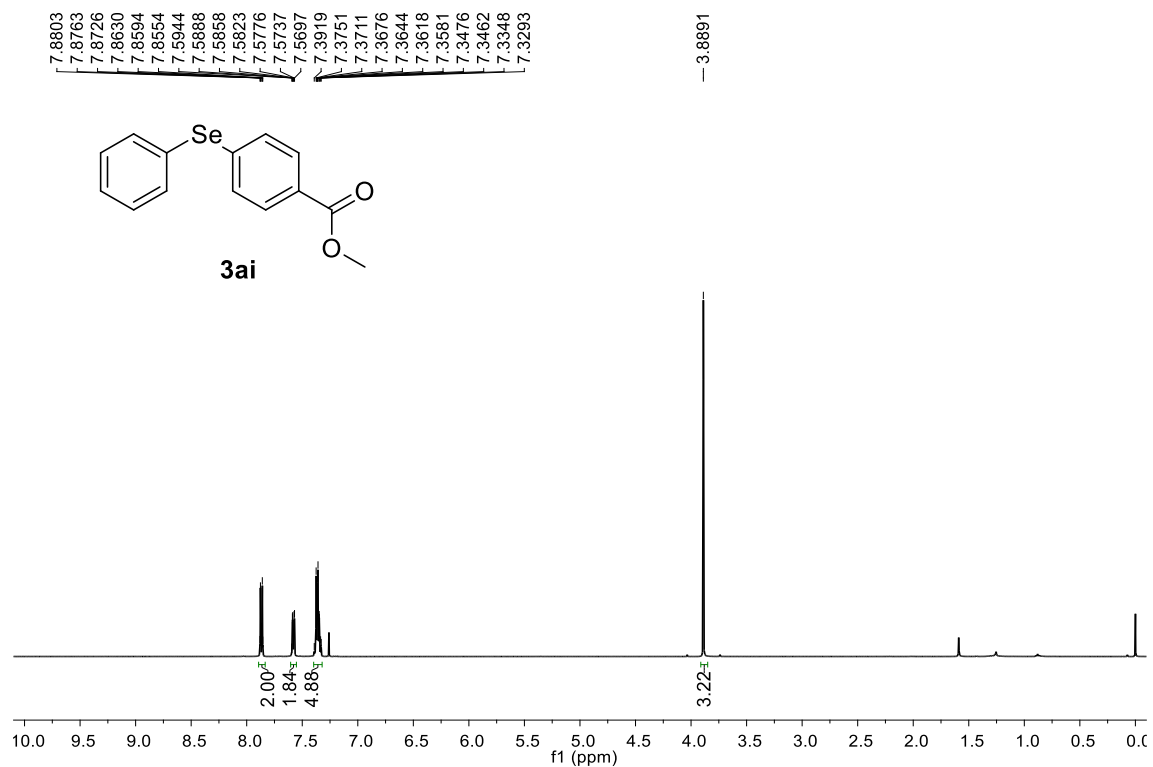

**Figure S17** <sup>1</sup>H NMR (500 MHz) spectrum of **3ai** in CDCl<sub>3</sub>

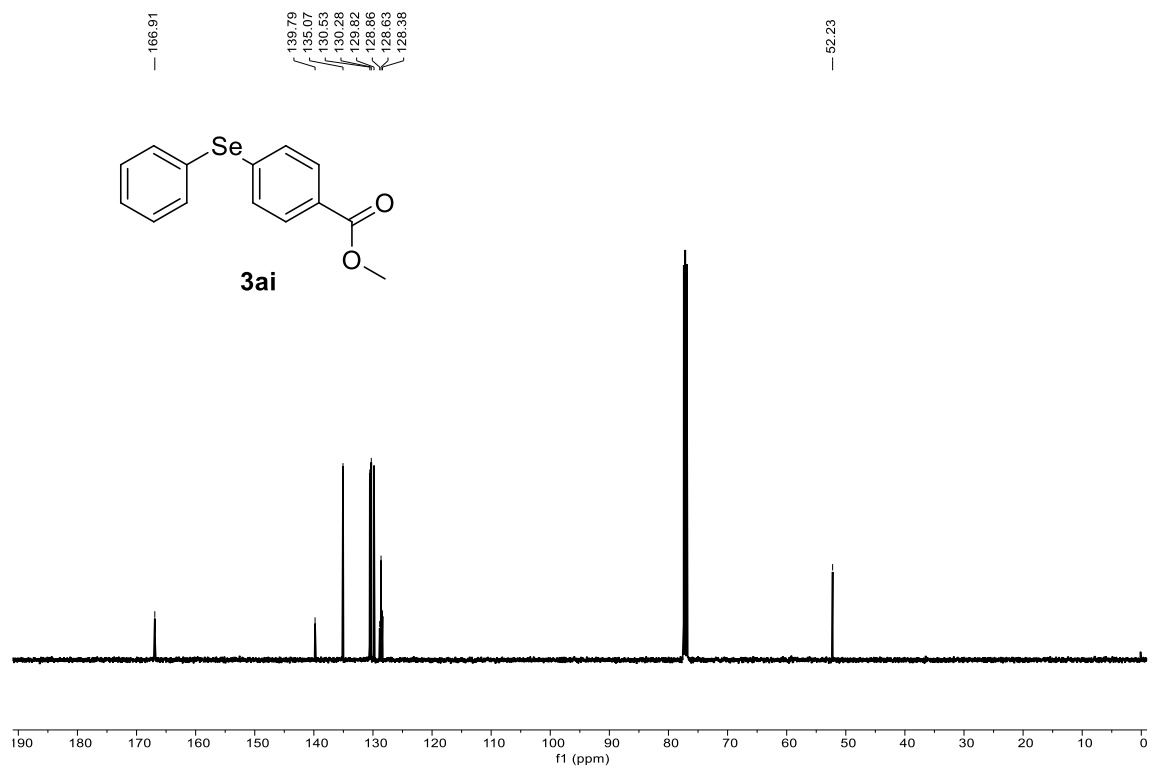

**Figure S18** <sup>13</sup>C NMR (125 MHz) spectrum of **3ai** in CDCl<sub>3</sub>

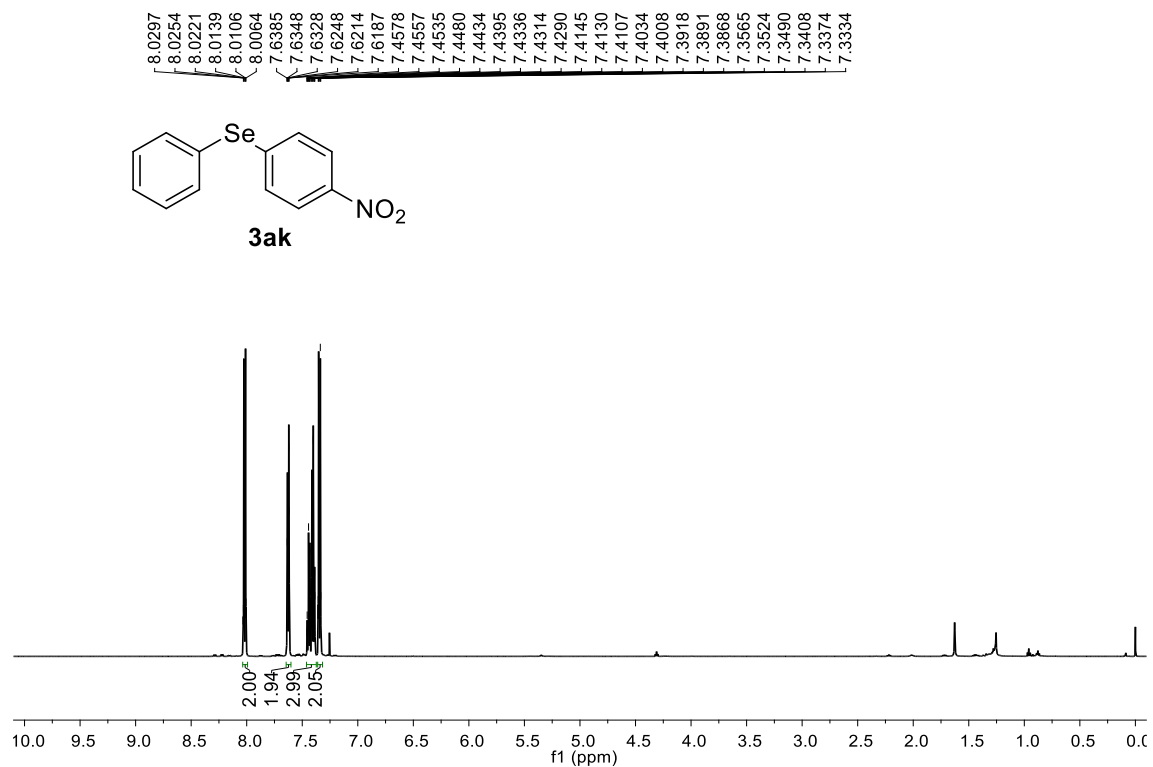

**Figure S19** <sup>1</sup>H NMR (500 MHz) spectrum of **3ak** in CDCl<sub>3</sub>

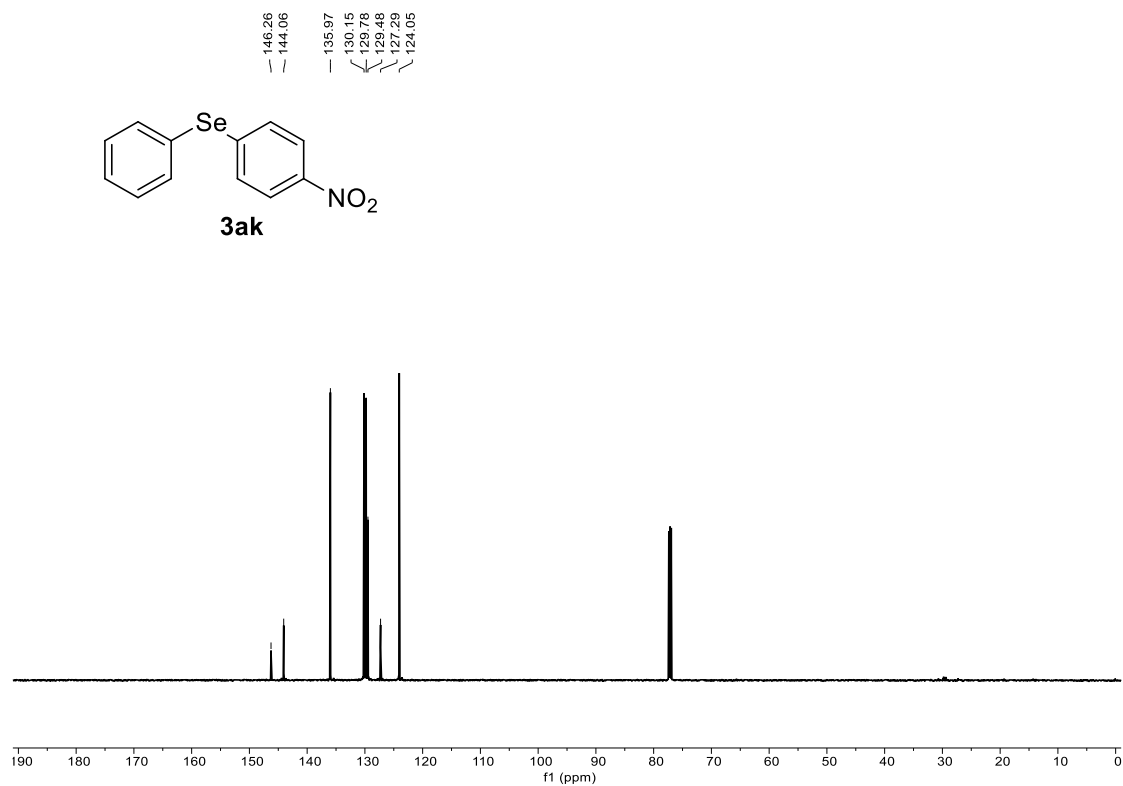

**Figure S20** <sup>13</sup>C NMR (125 MHz) spectrum of **3ak** in CDCl<sub>3</sub>

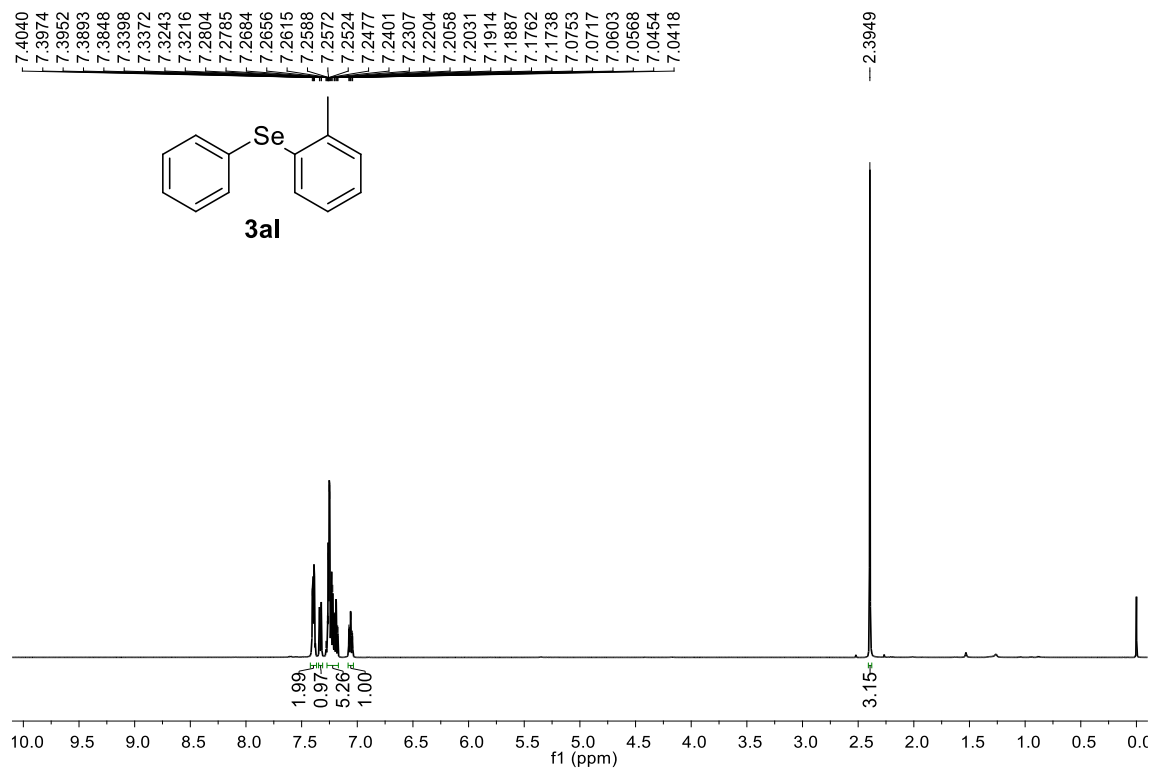

**Figure S21**  $^1\text{H NMR}$  (500 MHz) spectrum of **3al** in  $\text{CDCl}_3$

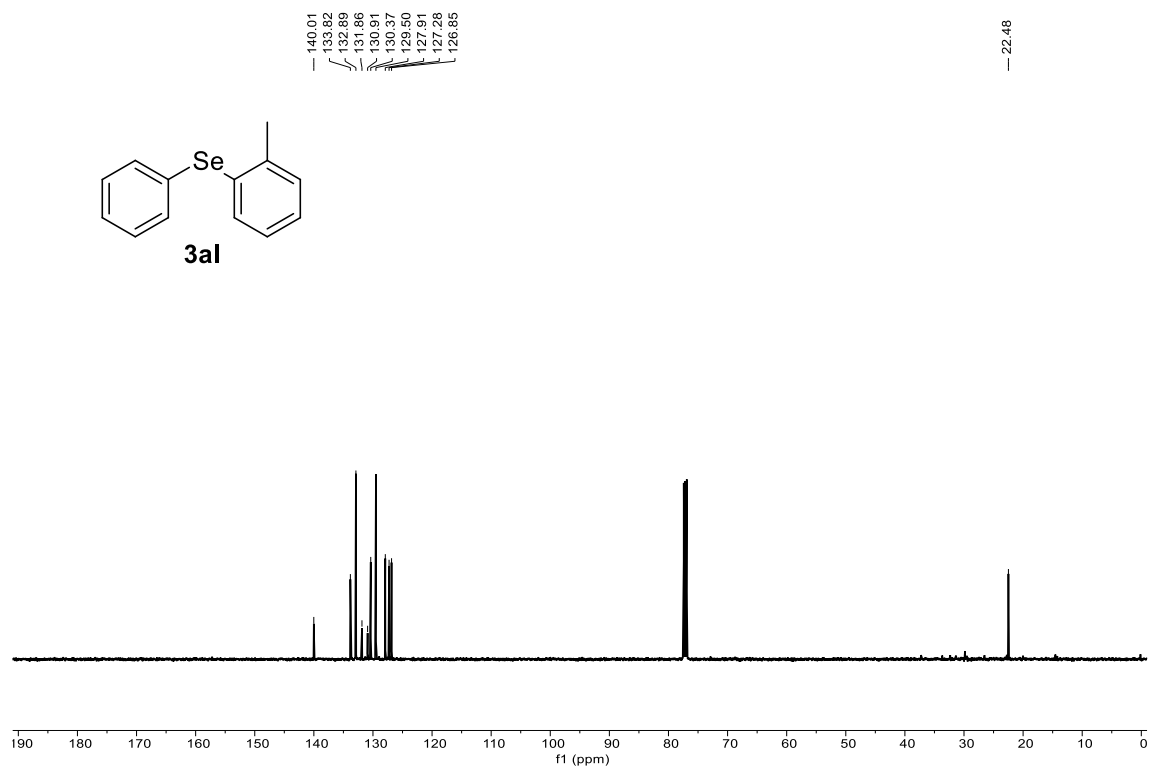

**Figure S22**  $^{13}\text{C NMR}$  (125 MHz) spectrum of **3al** in  $\text{CDCl}_3$

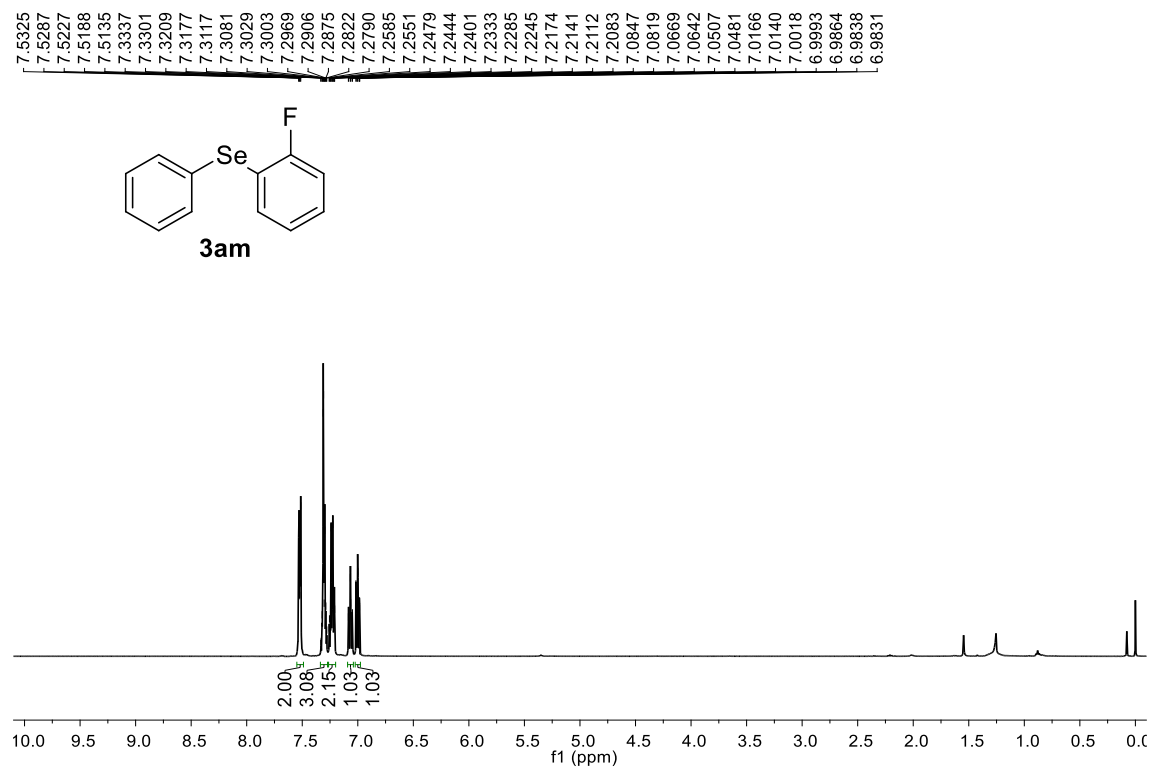

**Figure S23**  $^1\text{H}$  NMR (500 MHz) spectrum of **3am** in  $\text{CDCl}_3$

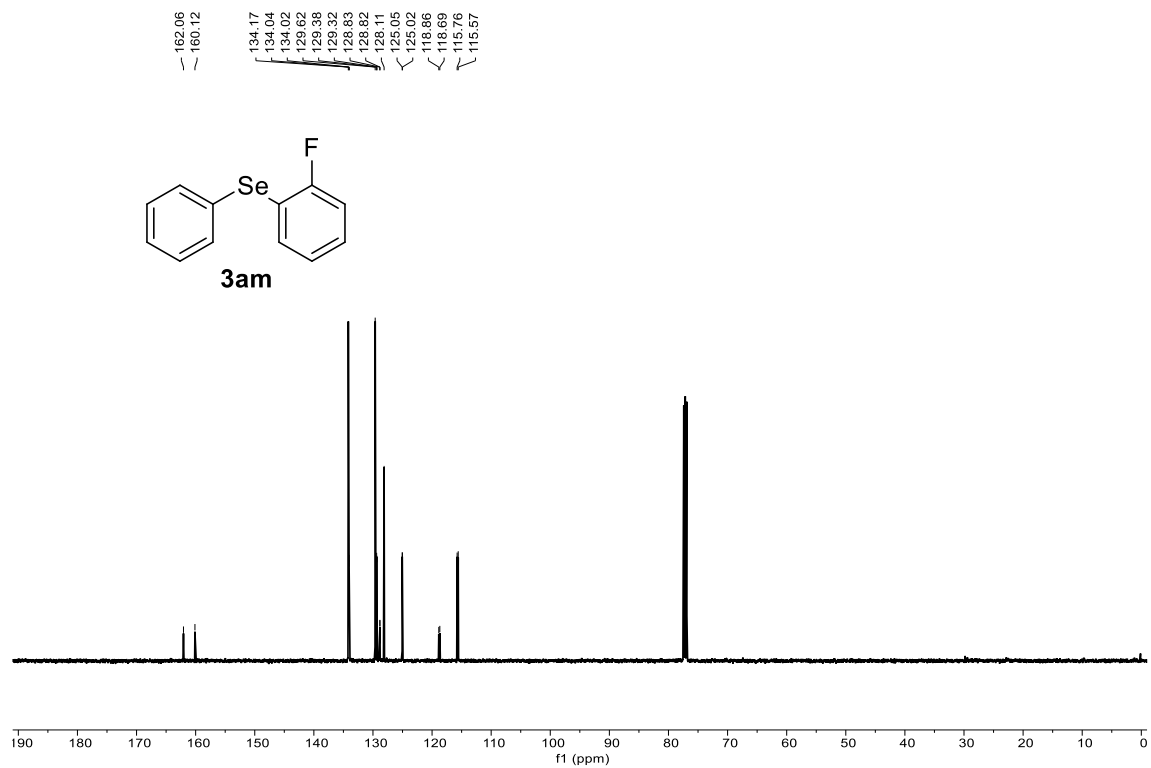

**Figure S24**  $^{13}\text{C}$  NMR (125 MHz) spectrum of **3am** in  $\text{CDCl}_3$

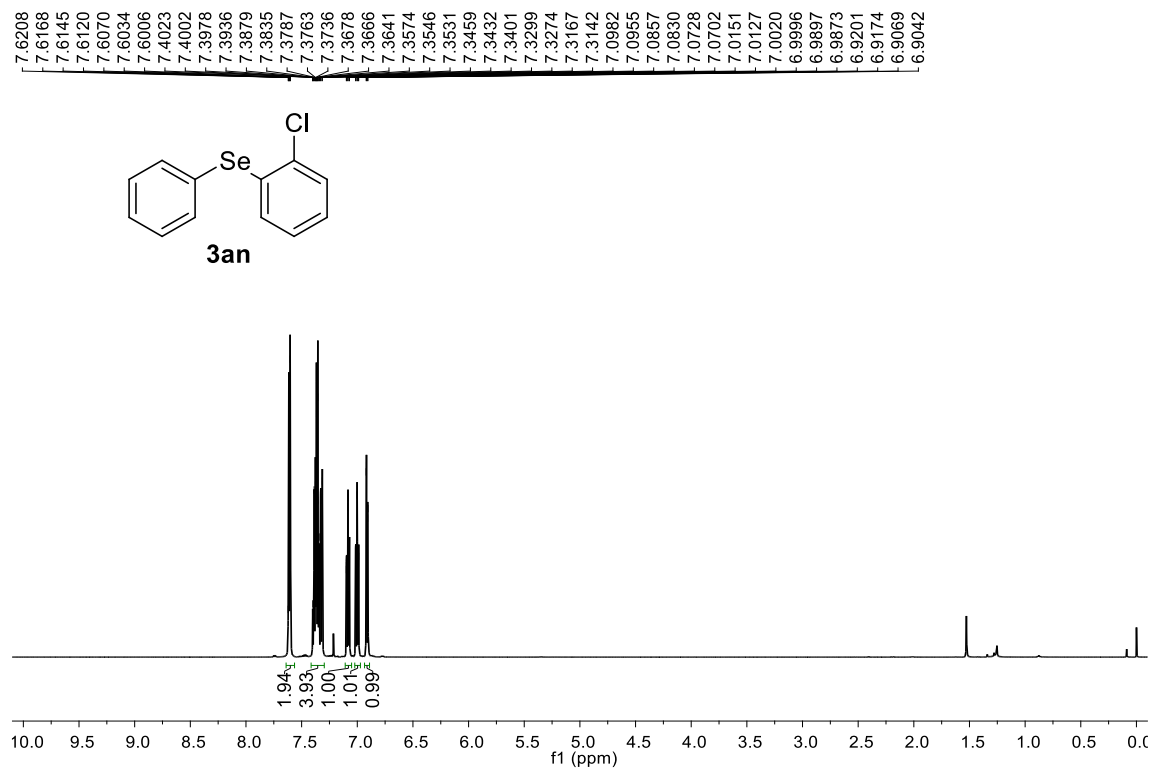

**Figure S25**  $^1\text{H}$  NMR (500 MHz) spectrum of **3an** in  $\text{CDCl}_3$

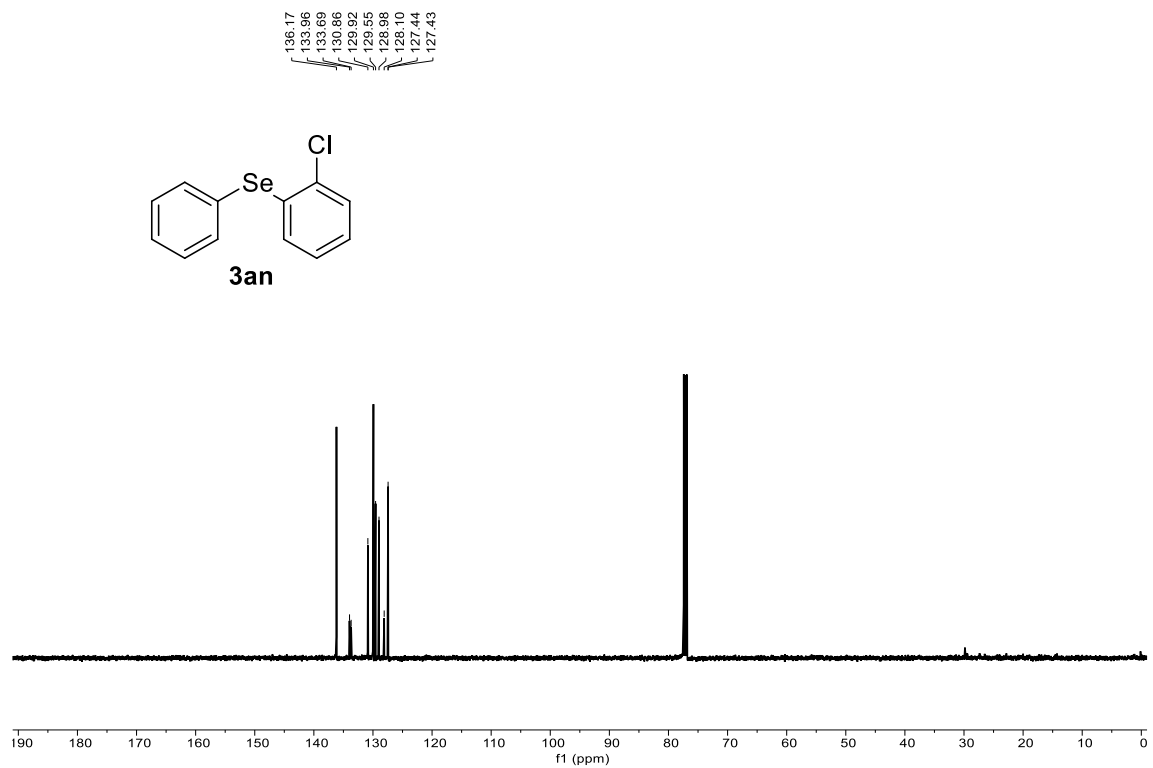

**Figure S26**  $^{13}\text{C}$  NMR (125 MHz) spectrum of **3an** in  $\text{CDCl}_3$

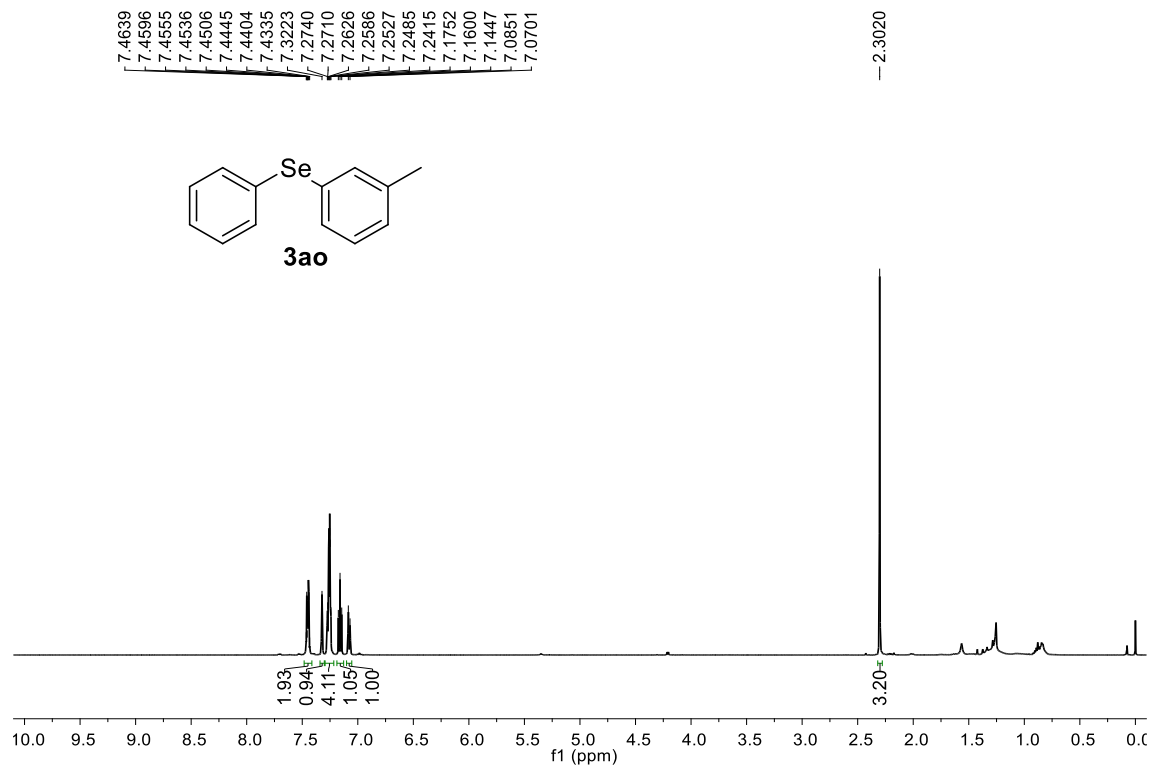

**Figure S27** <sup>1</sup>H NMR (500 MHz) spectrum of **3ao** in CDCl<sub>3</sub>

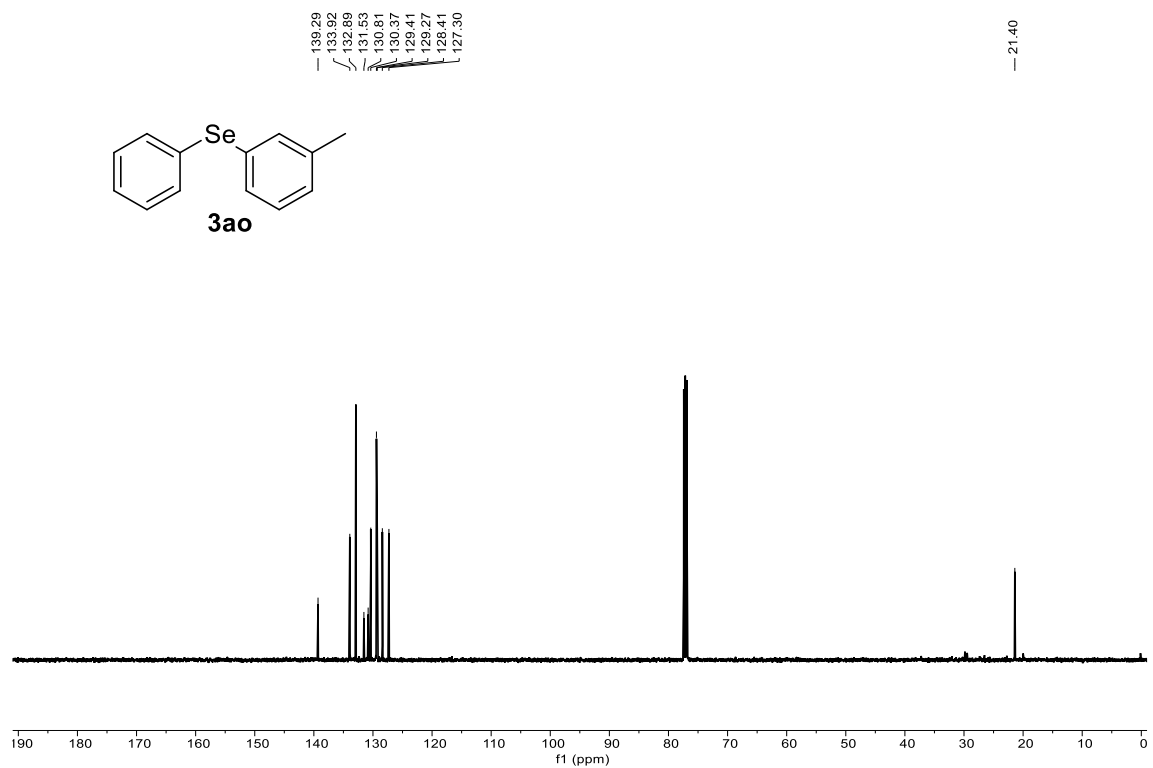

**Figure S28** <sup>13</sup>C NMR (125 MHz) spectrum of **3ao** in CDCl<sub>3</sub>

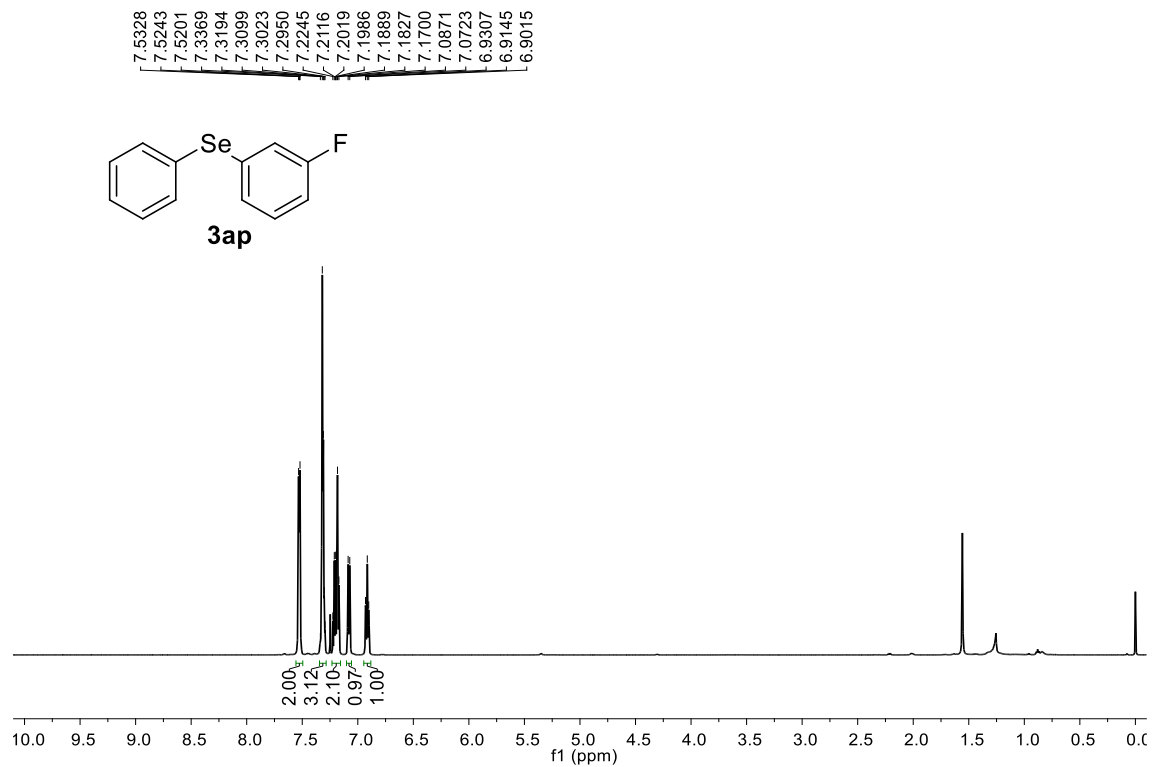

**Figure S29**  $^1\text{H}$  NMR (500 MHz) spectrum of **3ap** in  $\text{CDCl}_3$

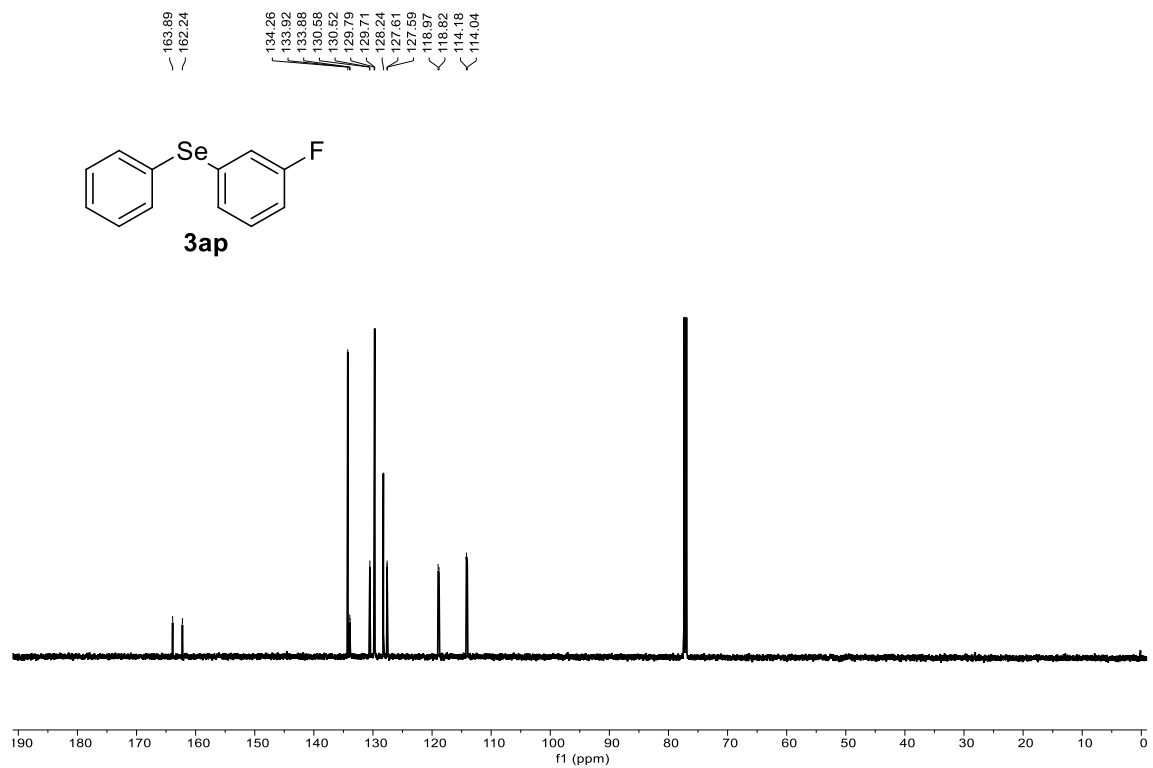

**Figure S30**  $^{13}\text{C}$  NMR (125 MHz) spectrum of **3ap** in  $\text{CDCl}_3$

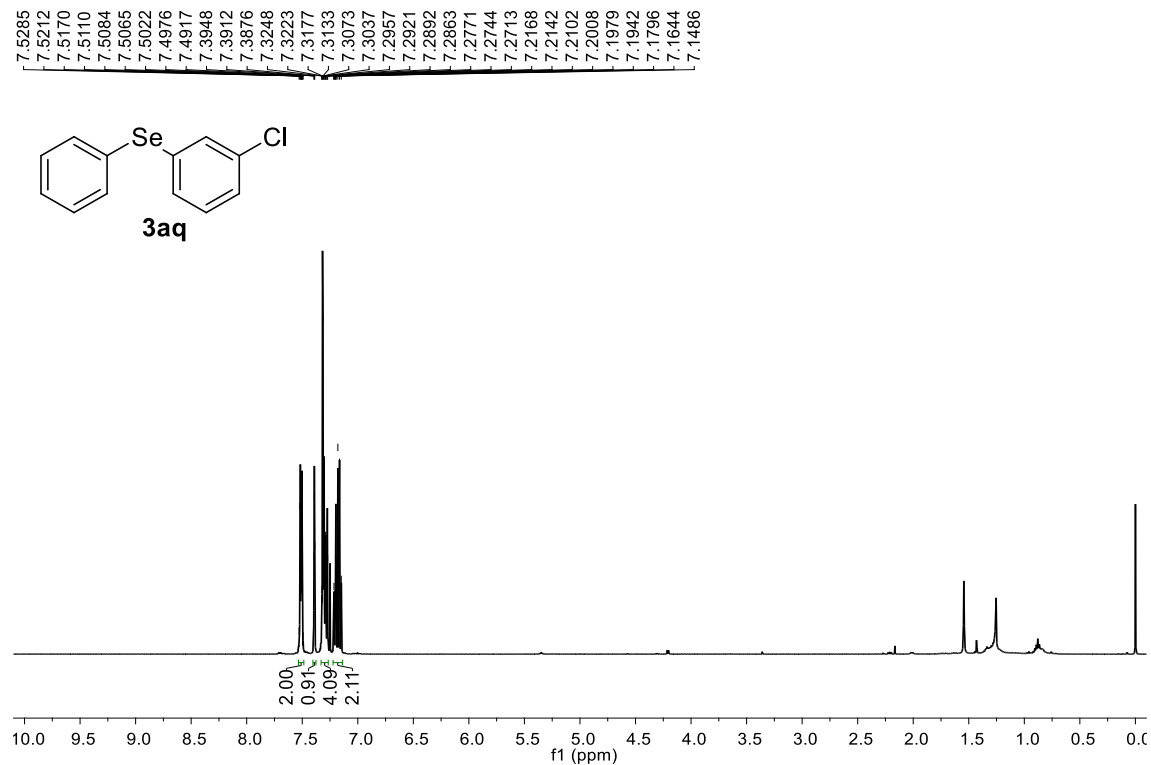

**Figure S31**  $^1\text{H}$  NMR (500 MHz) spectrum of **3aq** in  $\text{CDCl}_3$

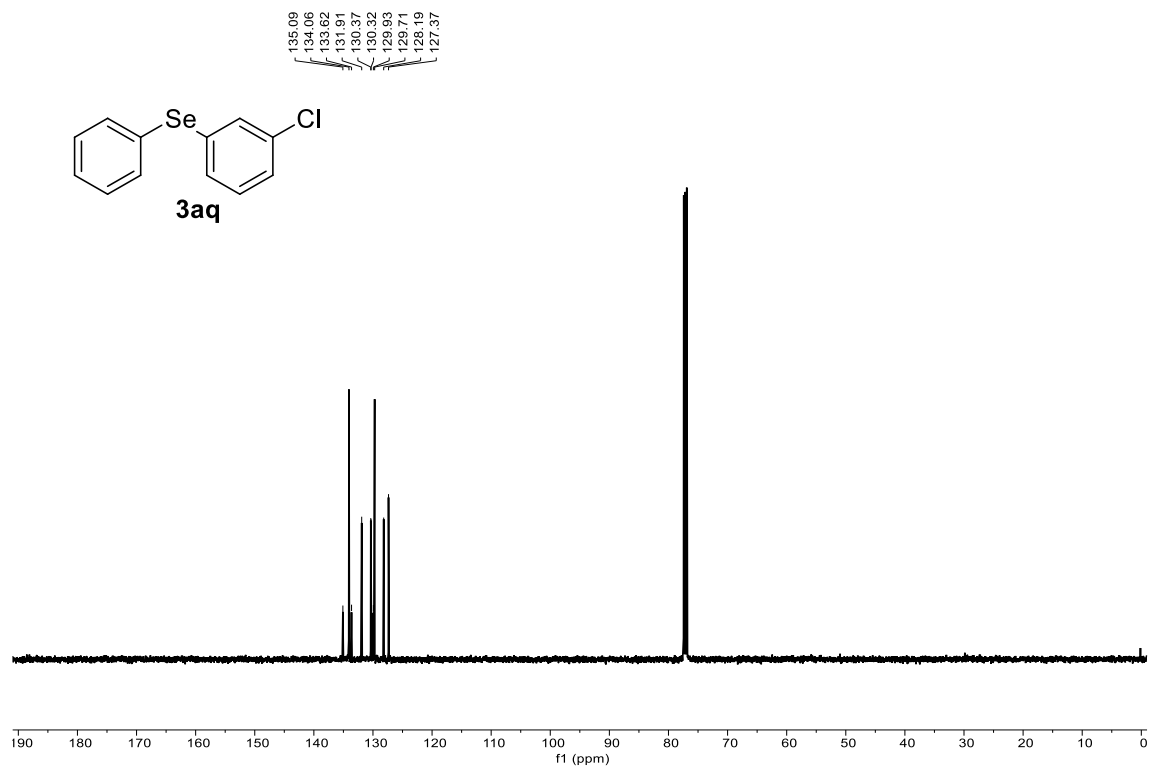

**Figure S32**  $^{13}\text{C}$  NMR (125 MHz) spectrum of **3aq** in  $\text{CDCl}_3$



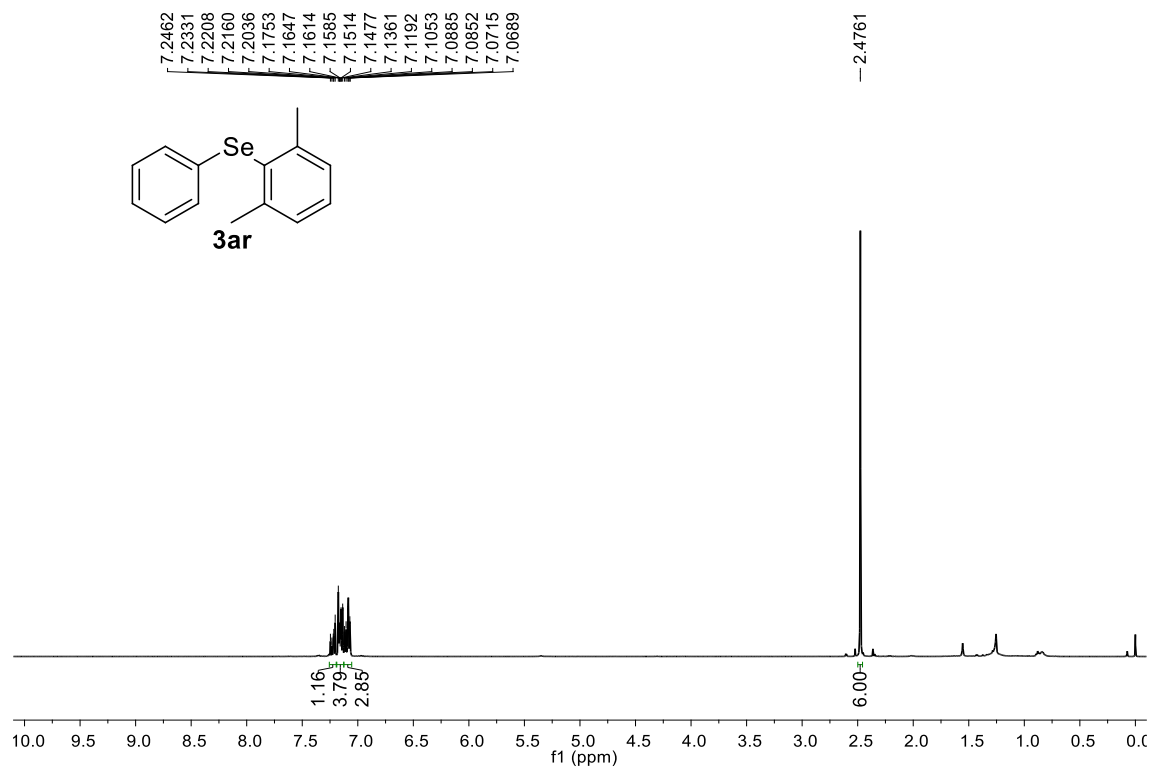

**Figure S33**  $^1\text{H NMR}$  (500 MHz) spectrum of **3ar** in  $\text{CDCl}_3$

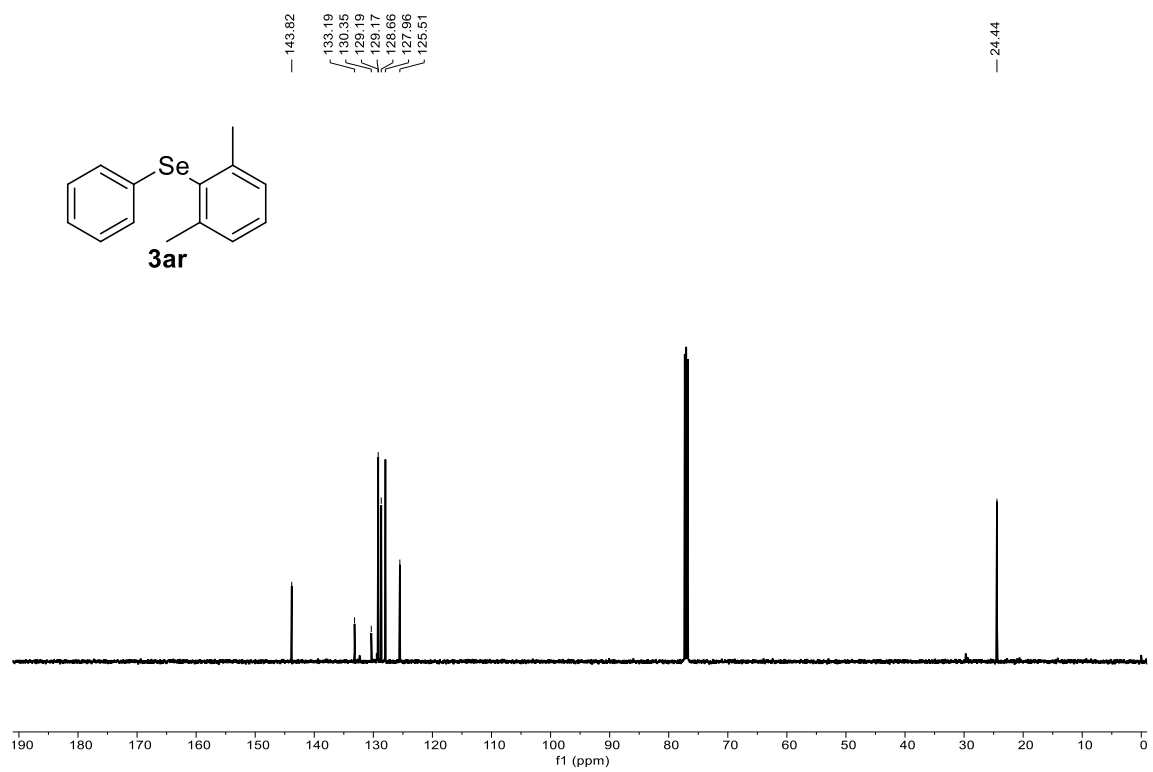

**Figure S34**  $^{13}\text{C NMR}$  (125 MHz) spectrum of **3ar** in  $\text{CDCl}_3$

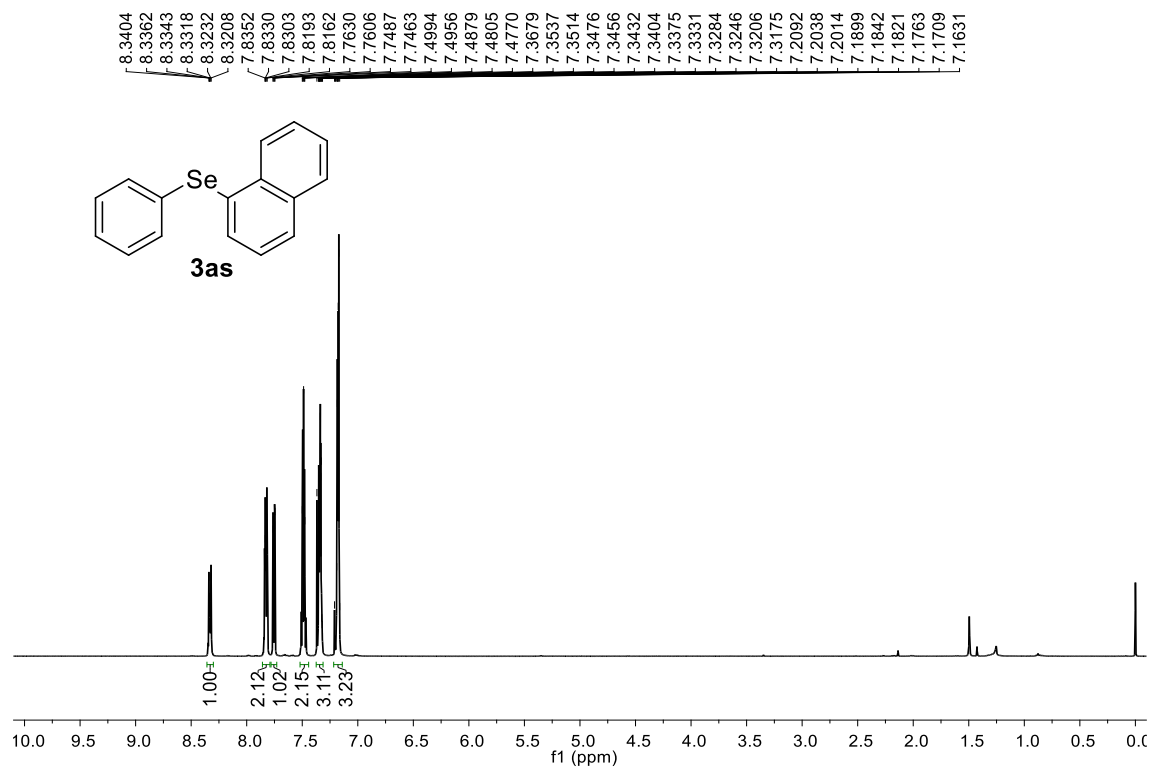

**Figure S35** <sup>1</sup>H NMR (500 MHz) spectrum of **3as** in CDCl<sub>3</sub>

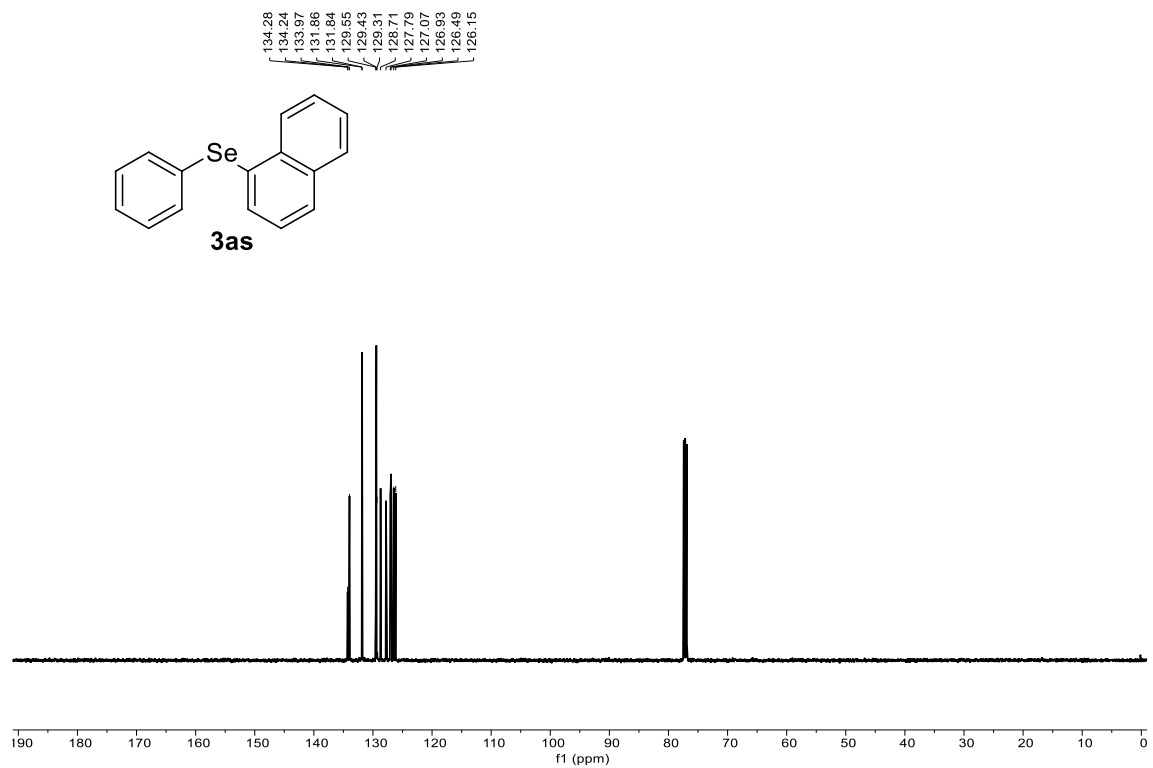

**Figure S36** <sup>13</sup>C NMR (125 MHz) spectrum of **3as** in CDCl<sub>3</sub>

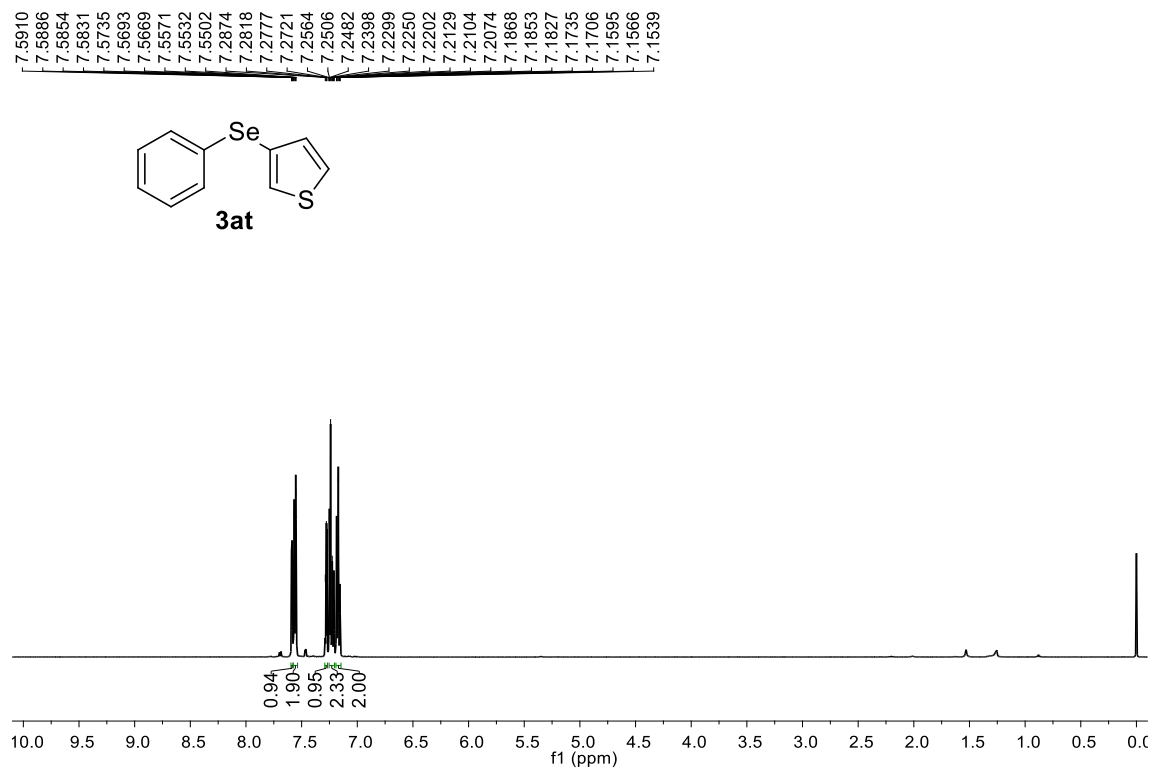

**Figure S37**  $^1\text{H}$  NMR (500 MHz) spectrum of **3at** in  $\text{CDCl}_3$

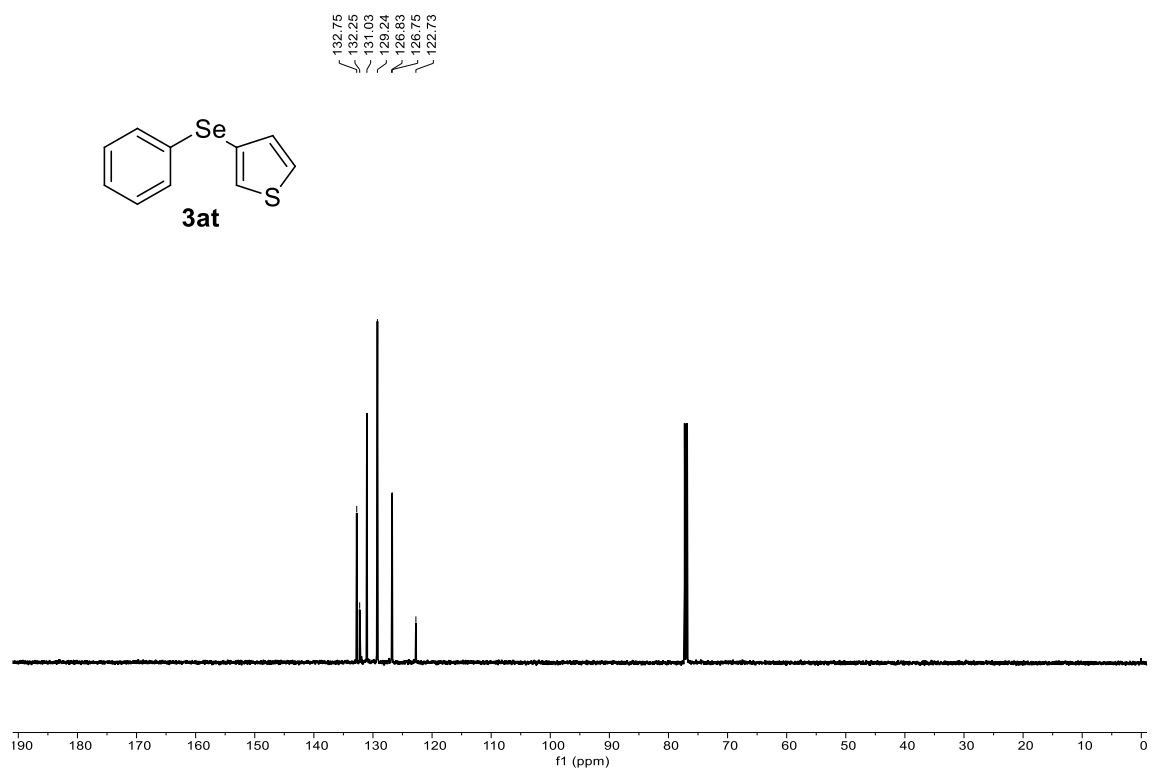

**Figure S38**  $^{13}\text{C}$  NMR (125 MHz) spectrum of **3at** in  $\text{CDCl}_3$

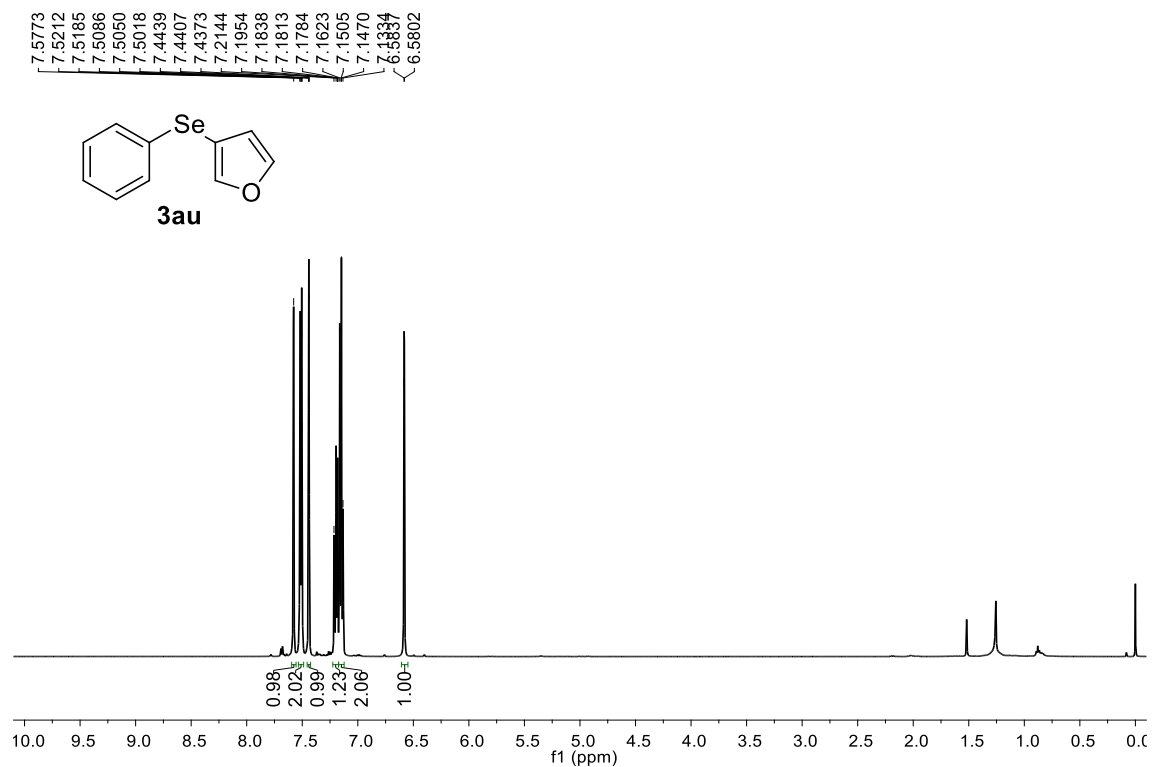

**Figure S39**  $^1\text{H}$  NMR (500 MHz) spectrum of **3au** in  $\text{CDCl}_3$

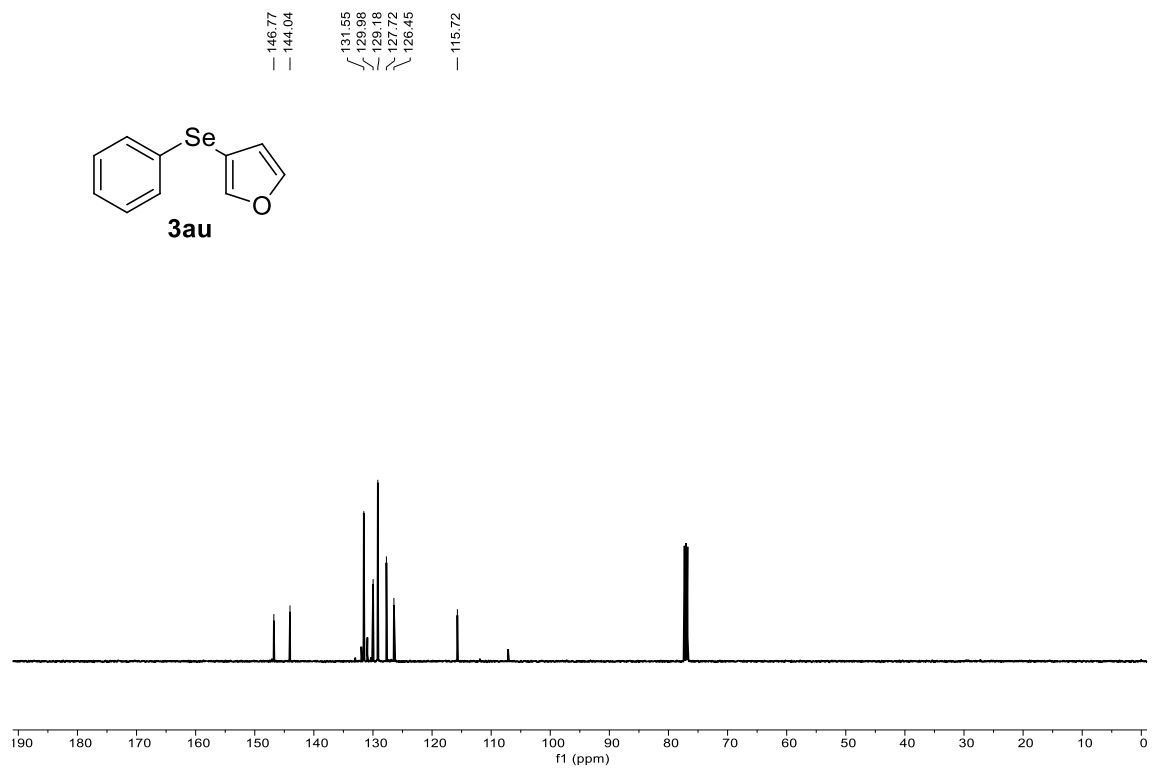

**Figure S40**  $^{13}\text{C}$  NMR (125 MHz) spectrum of **3au** in  $\text{CDCl}_3$

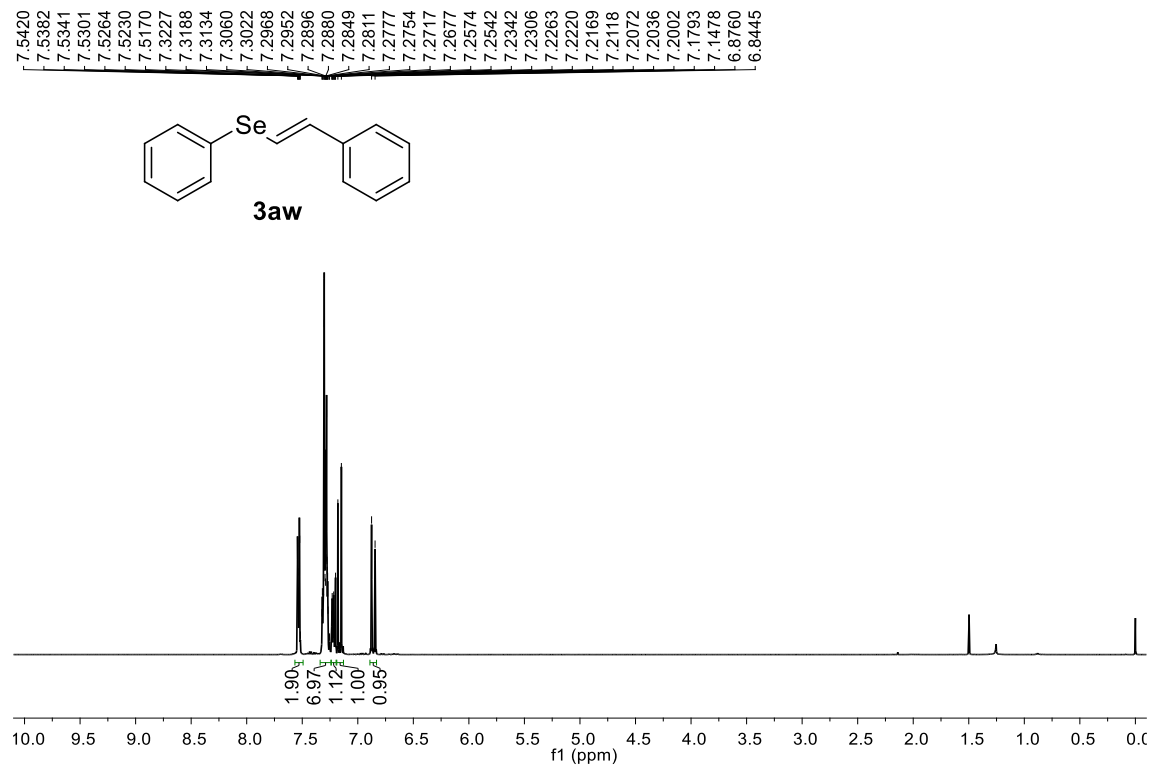

**Figure S41**  $^1\text{H}$  NMR (500 MHz) spectrum of **3aw** in  $\text{CDCl}_3$

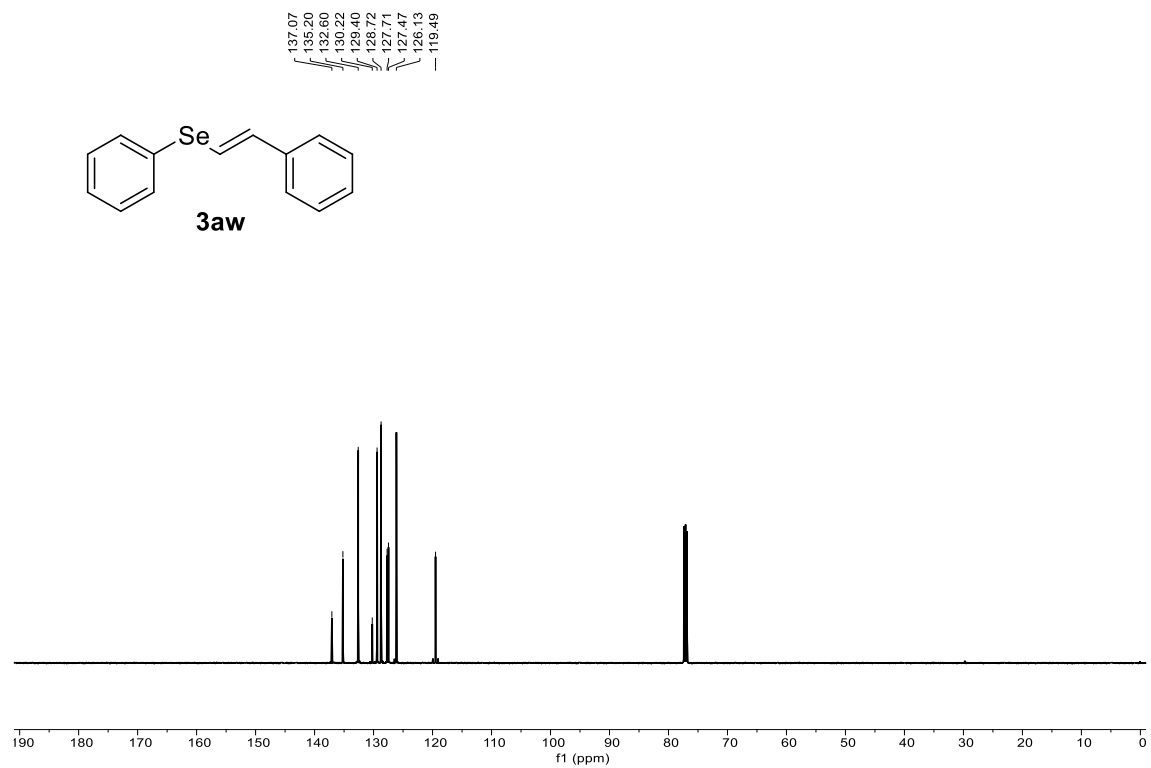

**Figure S42**  $^{13}\text{C}$  NMR (125 MHz) spectrum of **3aw** in  $\text{CDCl}_3$

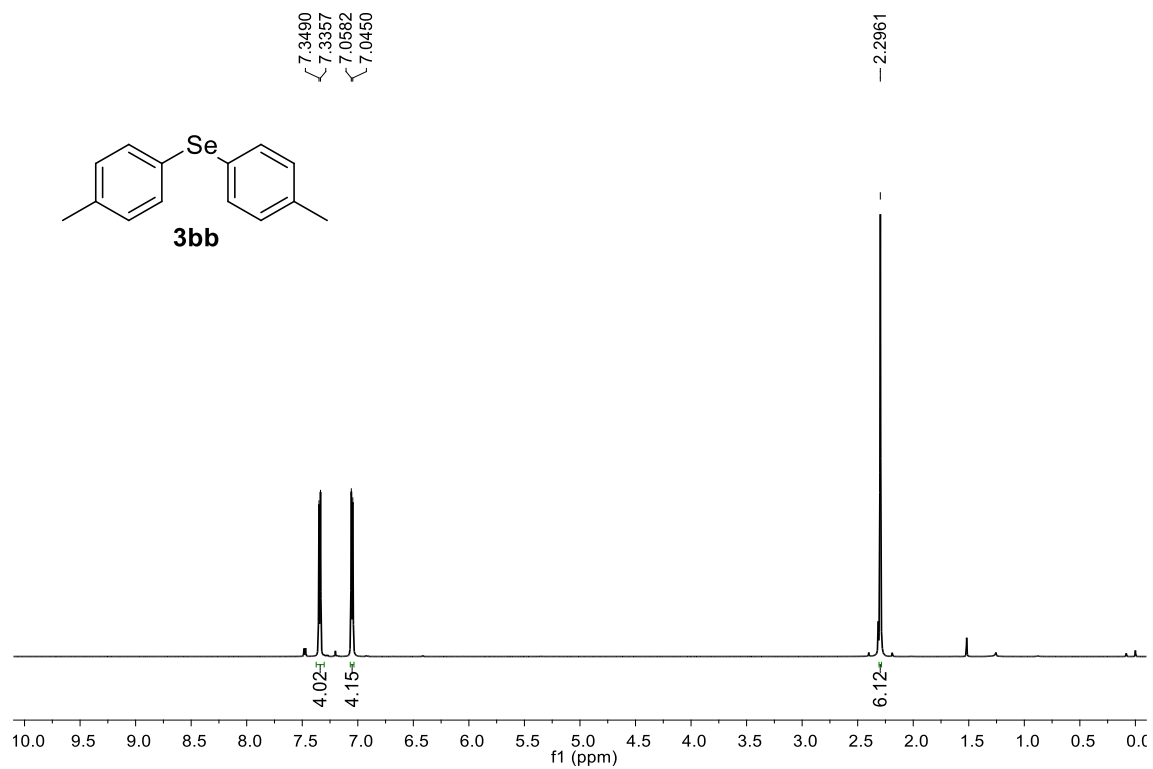

**Figure S43** <sup>1</sup>H NMR (500 MHz) spectrum of **3bb** in CDCl<sub>3</sub>

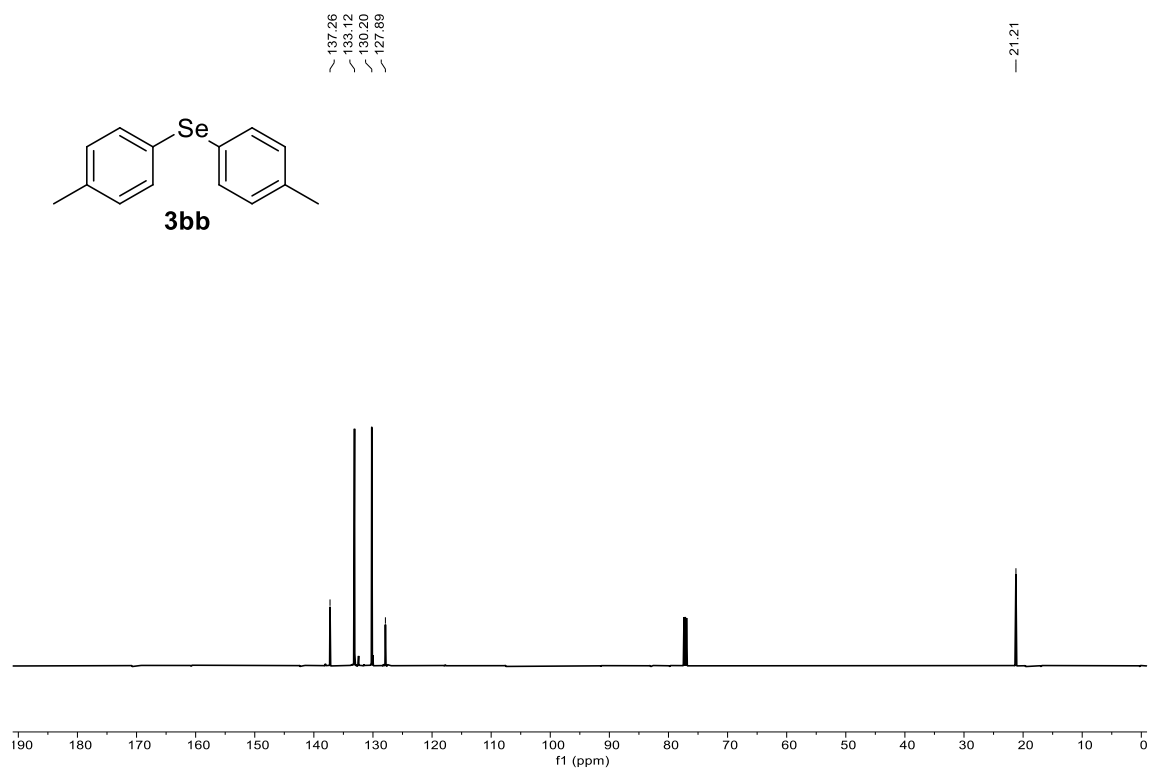

**Figure S44** <sup>13</sup>C NMR (125 MHz) spectrum of **3bb** in CDCl<sub>3</sub>

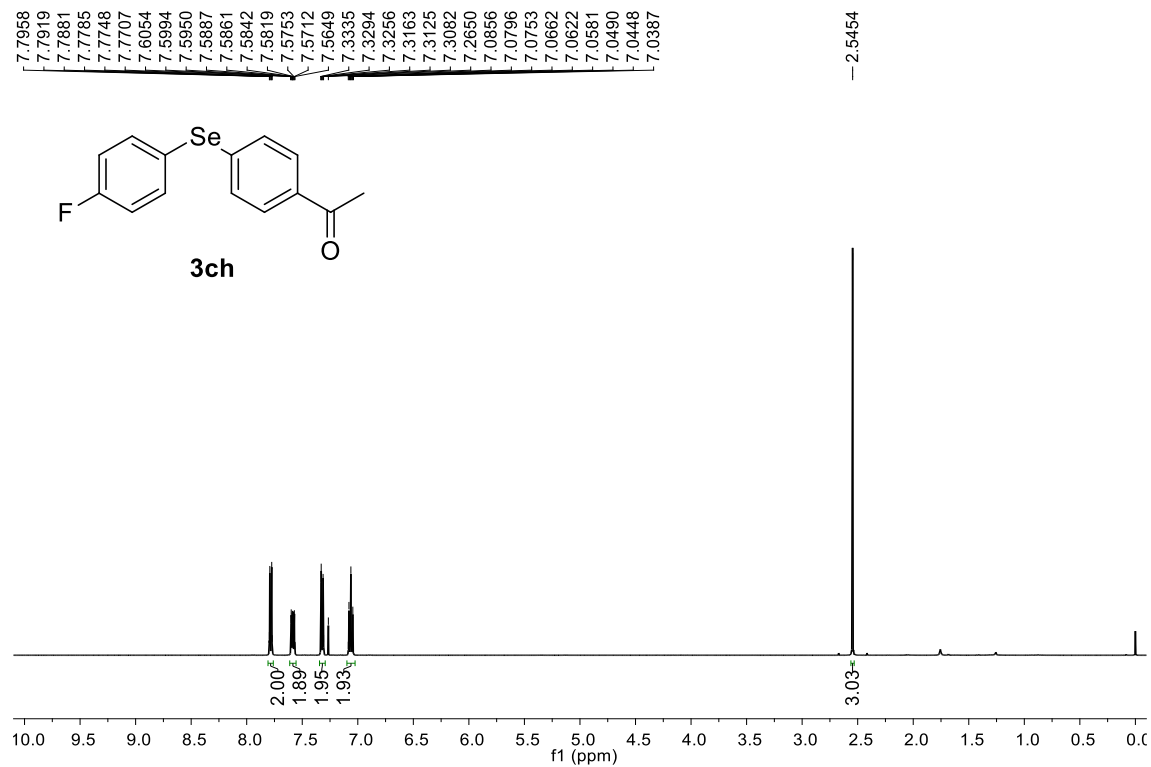

**Figure S45**  $^1\text{H}$  NMR (500 MHz) spectrum of **3ch** in  $\text{CDCl}_3$

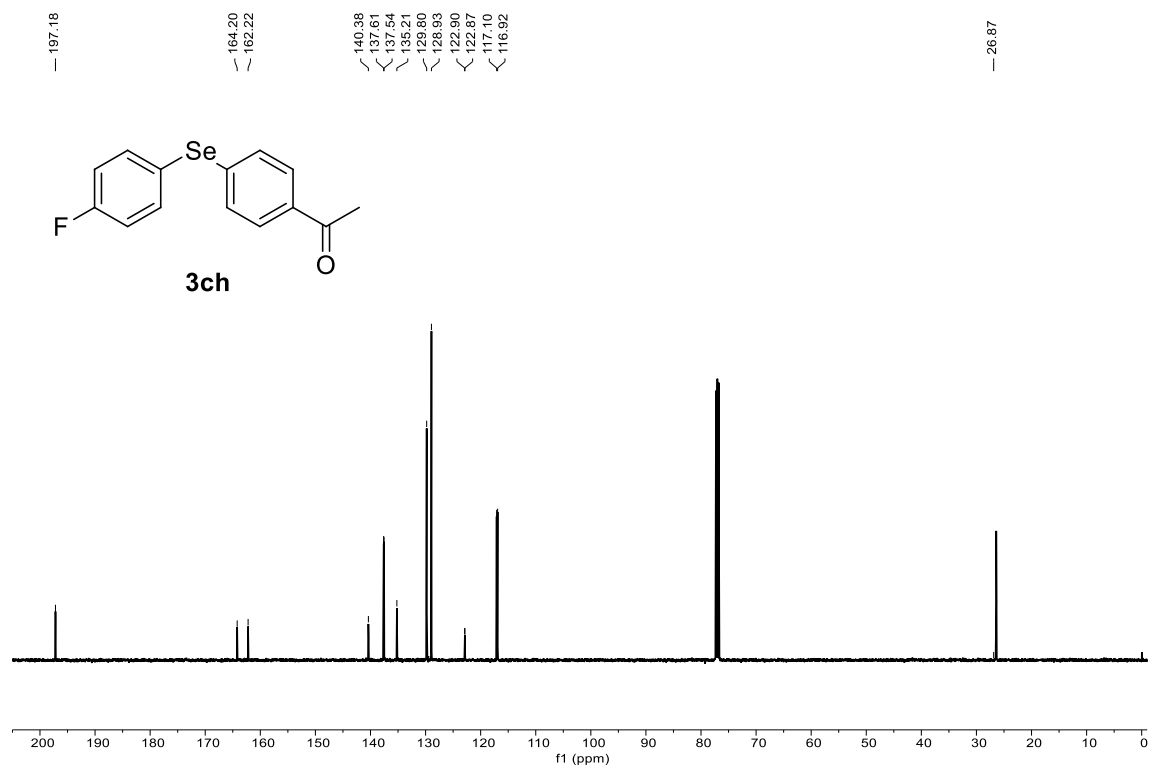

**Figure S46**  $^{13}\text{C}$  NMR (125 MHz) spectrum of **3ch** in  $\text{CDCl}_3$

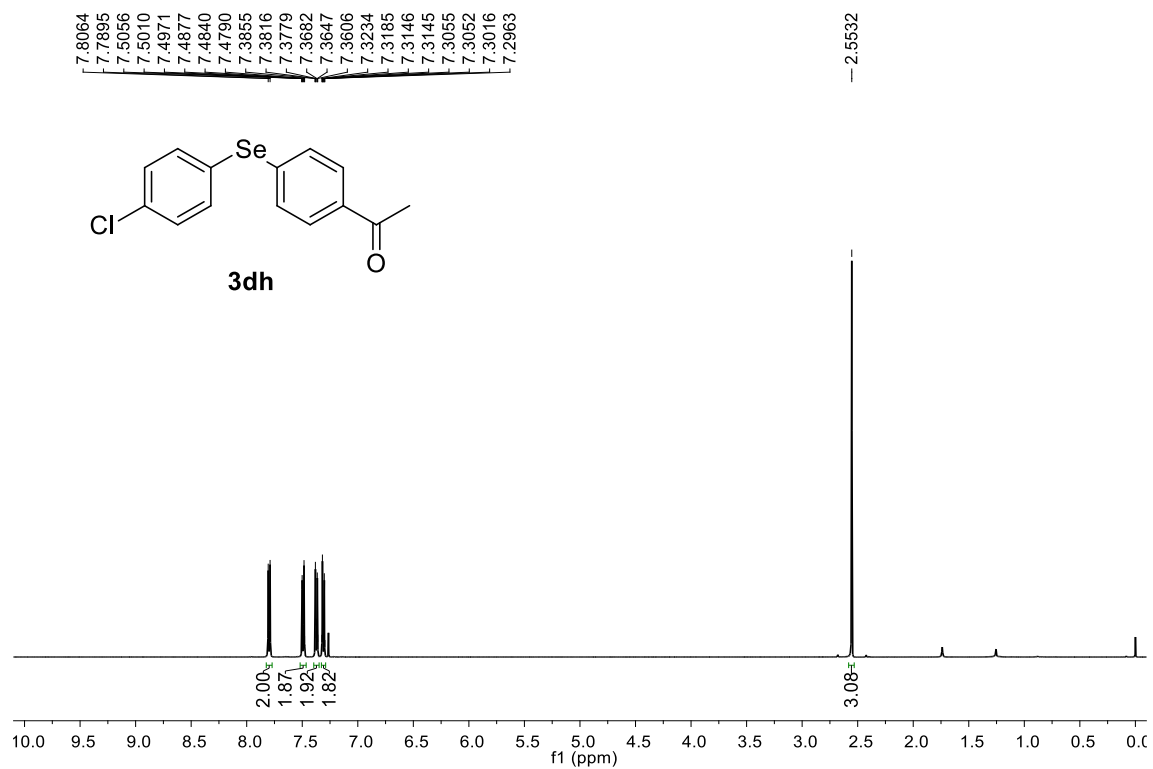

**Figure S47** <sup>1</sup>H NMR (500 MHz) spectrum of **3dh** in CDCl<sub>3</sub>

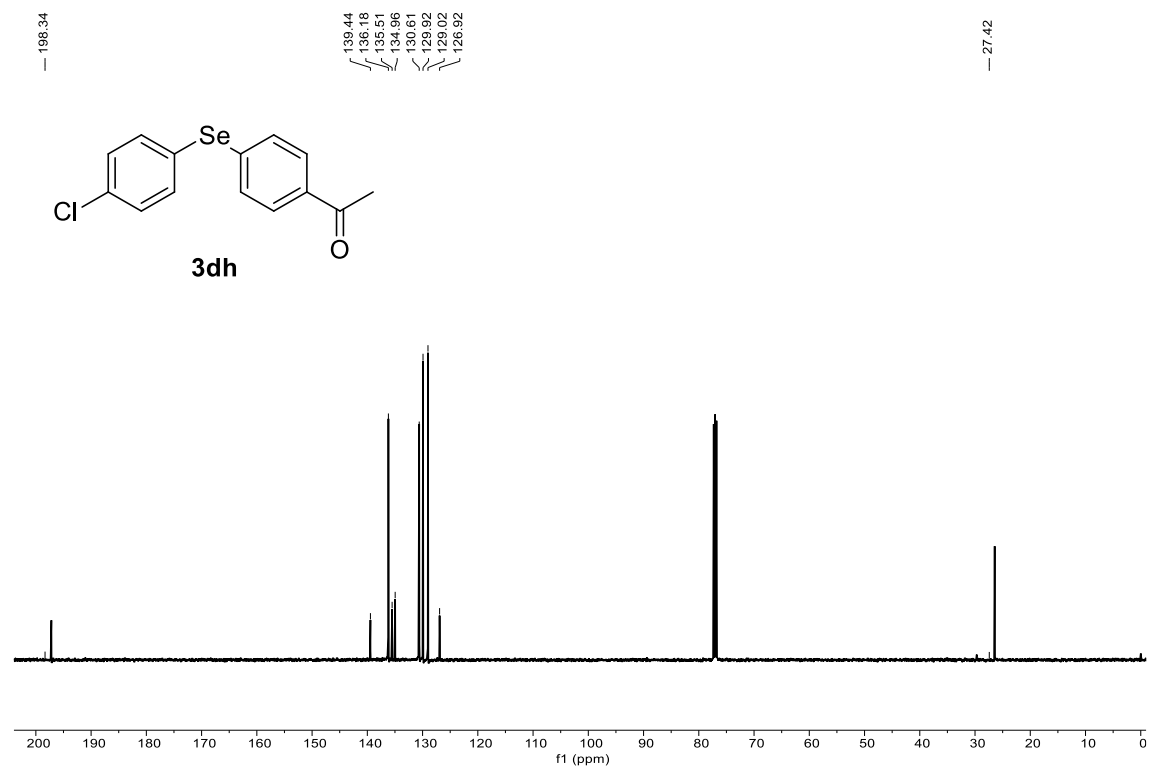

**Figure S48** <sup>13</sup>C NMR (125 MHz) spectrum of **3dh** in CDCl<sub>3</sub>



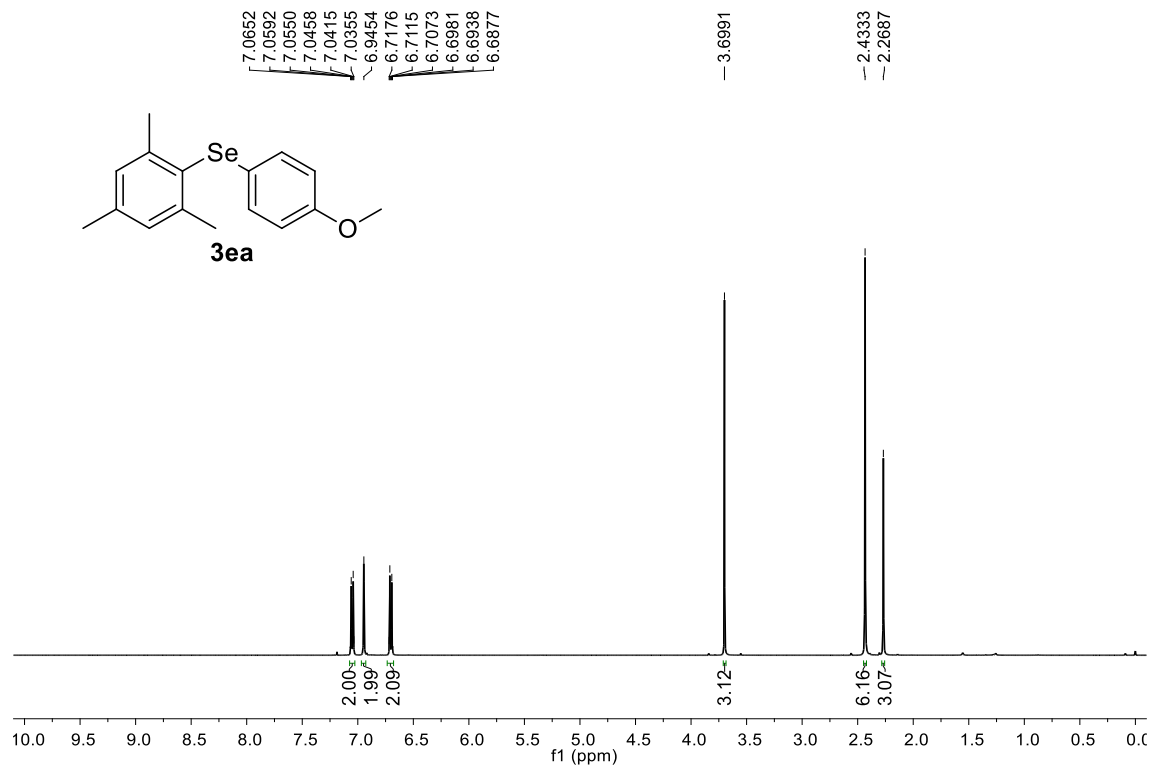

**Figure S49** <sup>1</sup>H NMR (500 MHz) spectrum of **3ea** in CDCl<sub>3</sub>

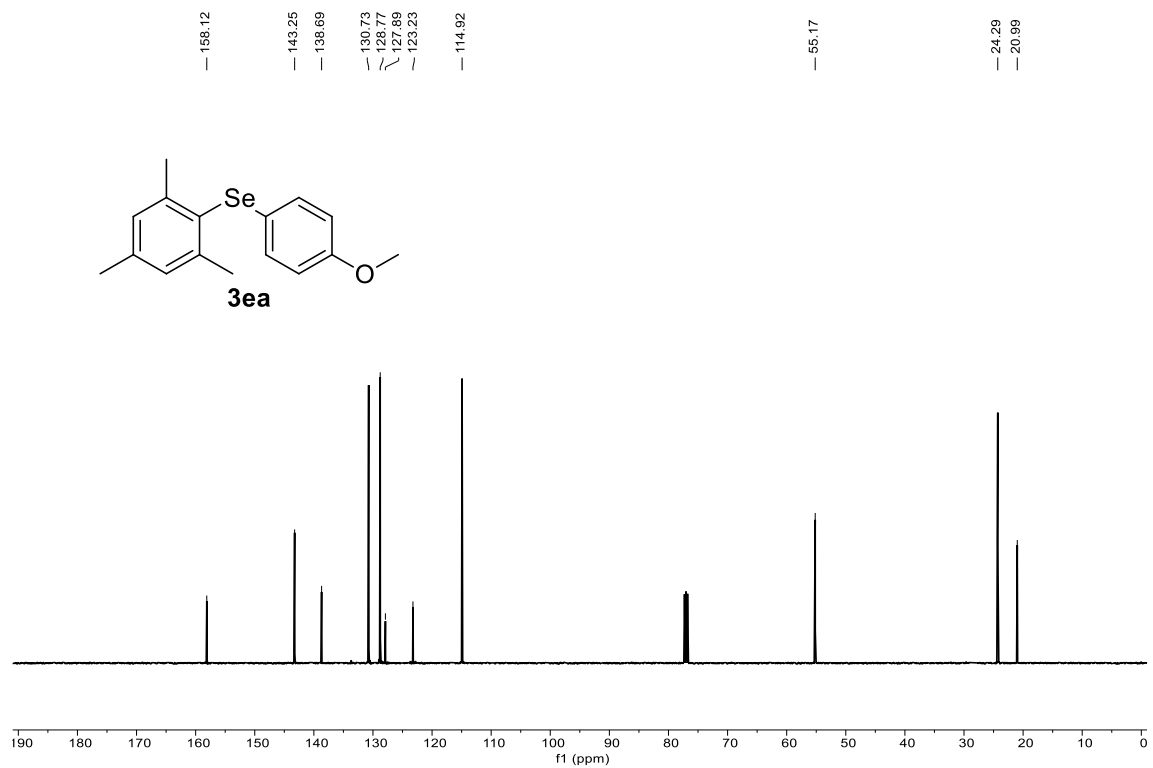

**Figure S50** <sup>13</sup>C NMR (125 MHz) spectrum of **3ea** in CDCl<sub>3</sub>

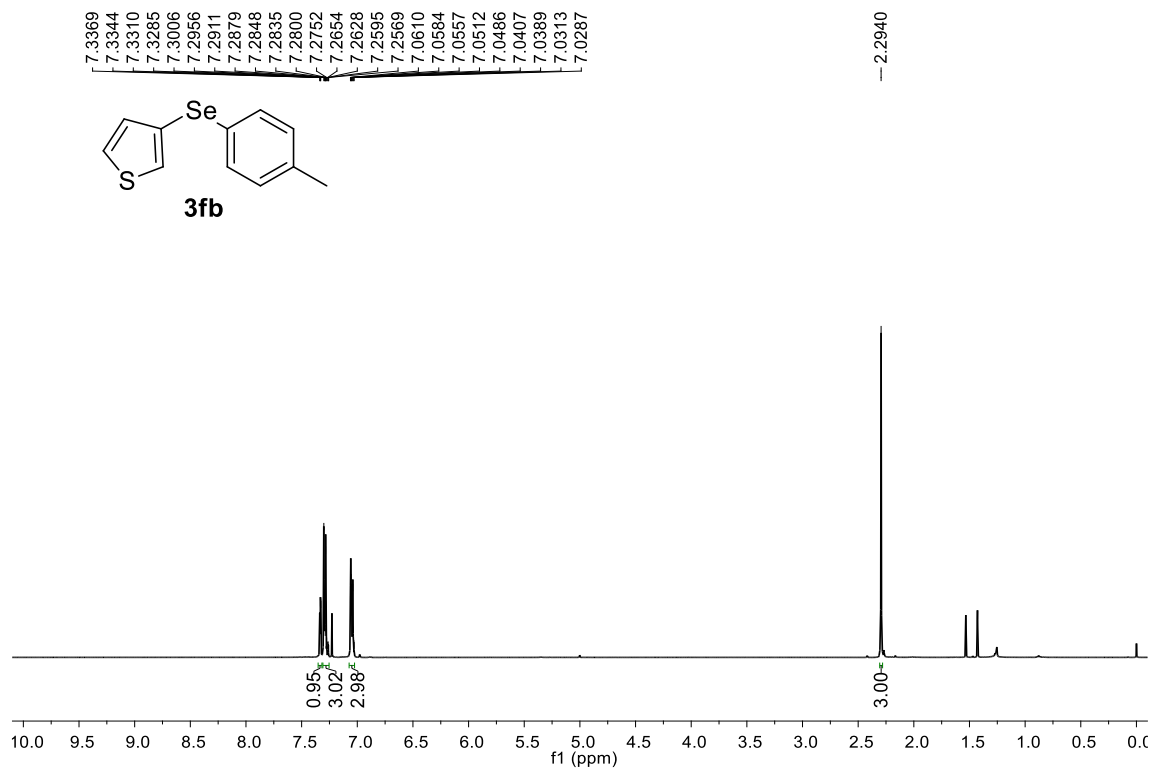

**Figure S51**  $^1\text{H}$  NMR (500 MHz) spectrum of **3fb** in  $\text{CDCl}_3$

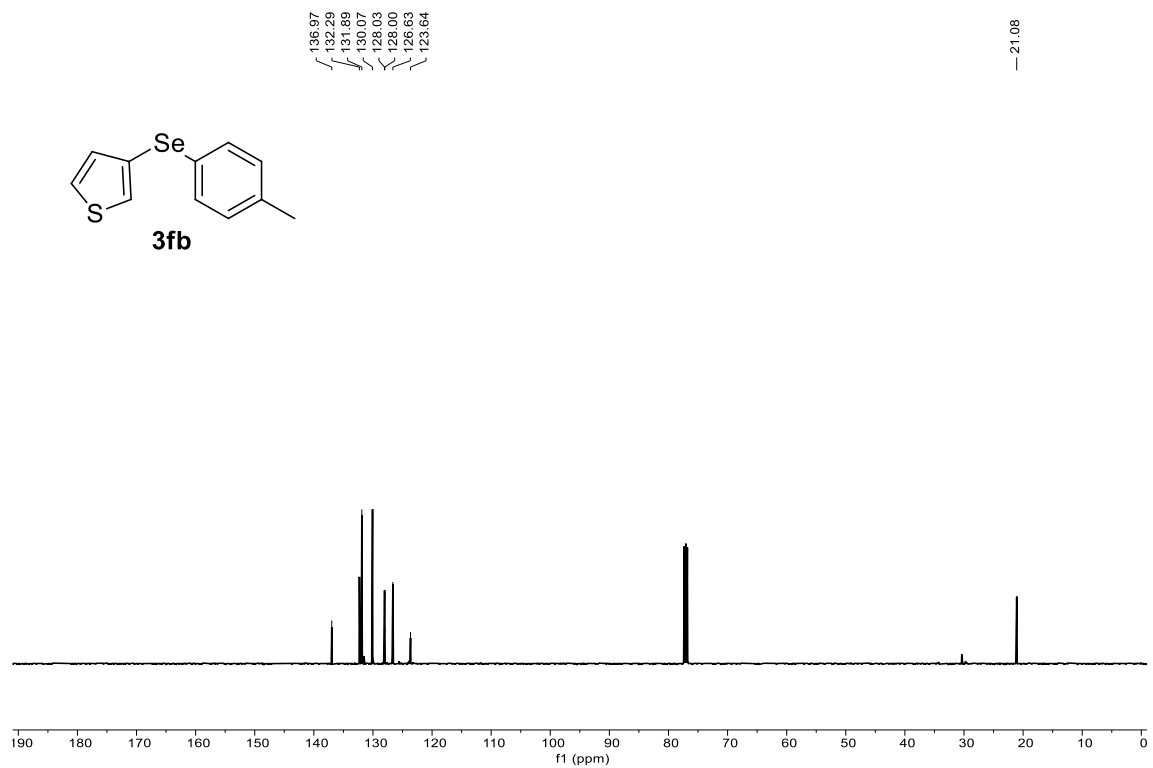

**Figure S52**  $^{13}\text{C}$  NMR (125 MHz) spectrum of **3fb** in  $\text{CDCl}_3$

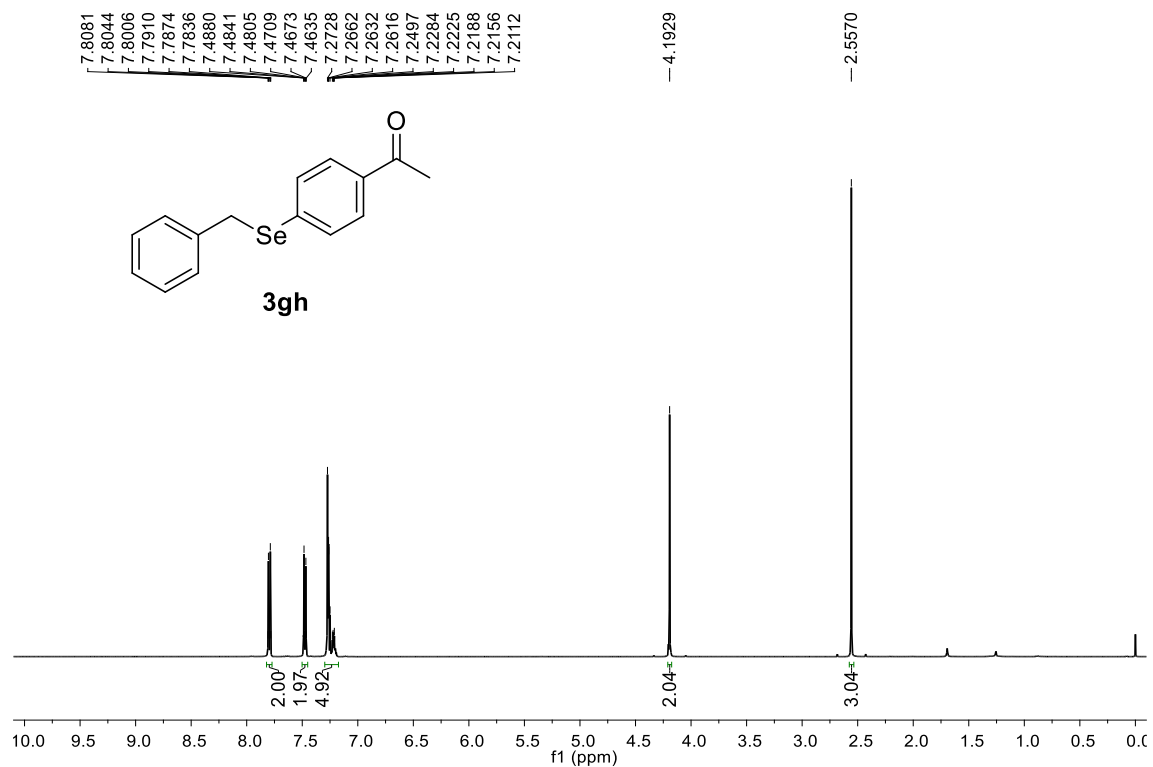

**Figure S53** <sup>1</sup>H NMR (500 MHz) spectrum of **3gh** in CDCl<sub>3</sub>

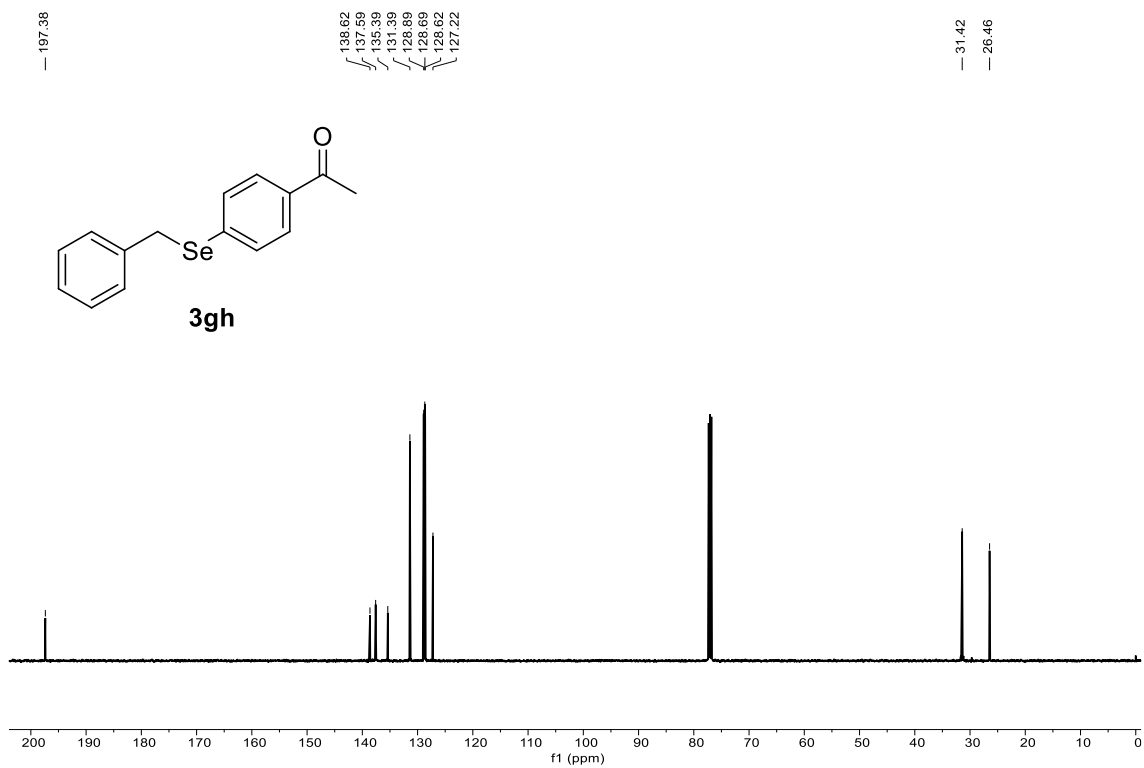

**Figure S54** <sup>13</sup>C NMR (125 MHz) spectrum of **3gh** in CDCl<sub>3</sub>

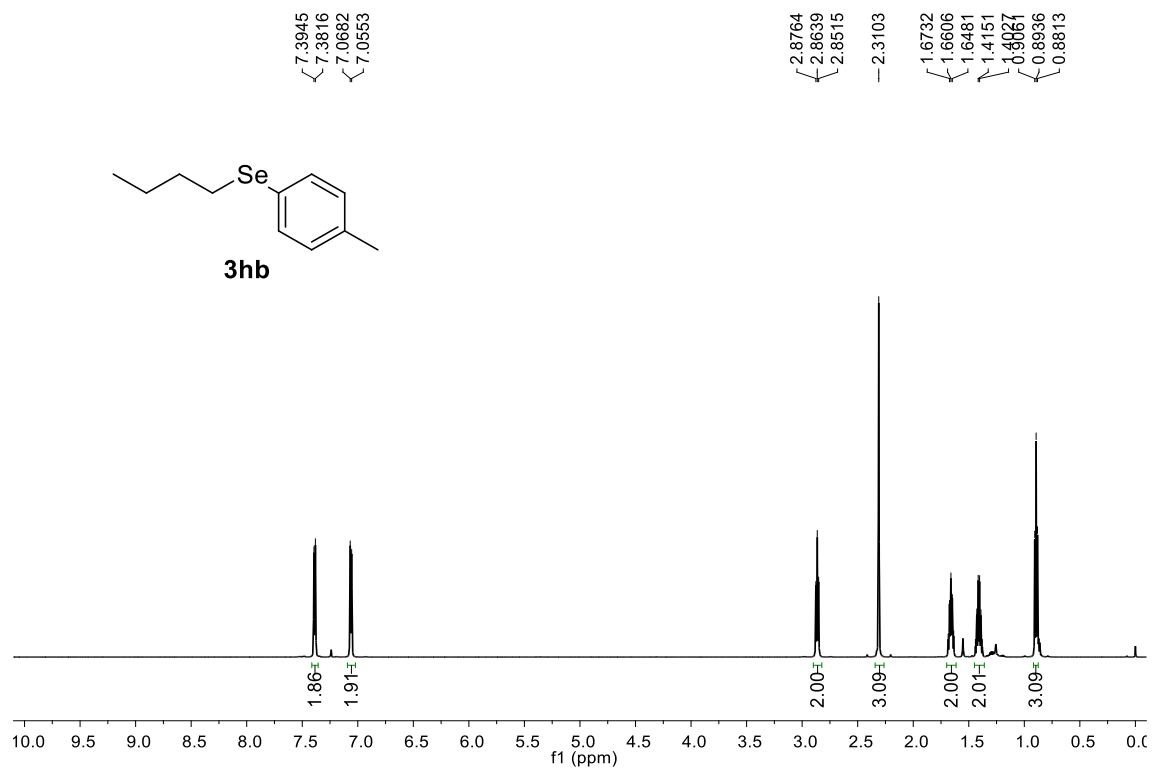

**Figure S55**  $^1\text{H}$  NMR (500 MHz) spectrum of **3hb** in  $\text{CDCl}_3$

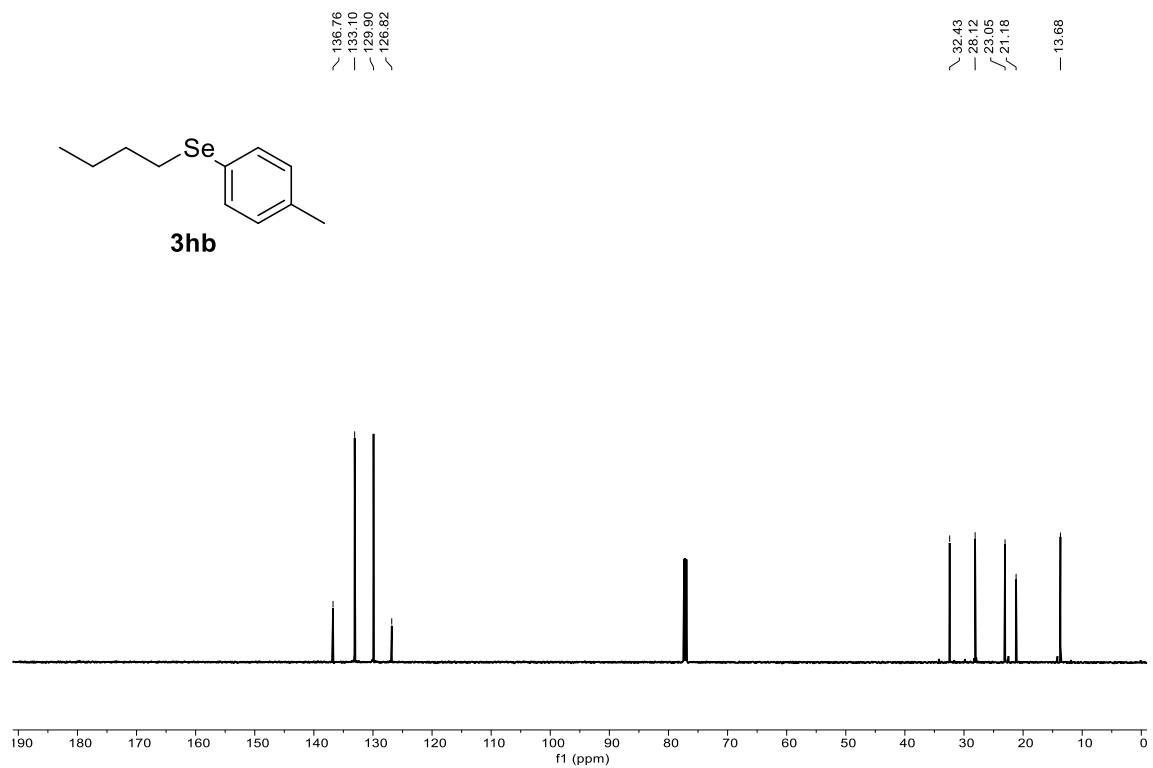

**Figure S56**  $^{13}\text{C}$  NMR (125 MHz) spectrum of **3hb** in  $\text{CDCl}_3$

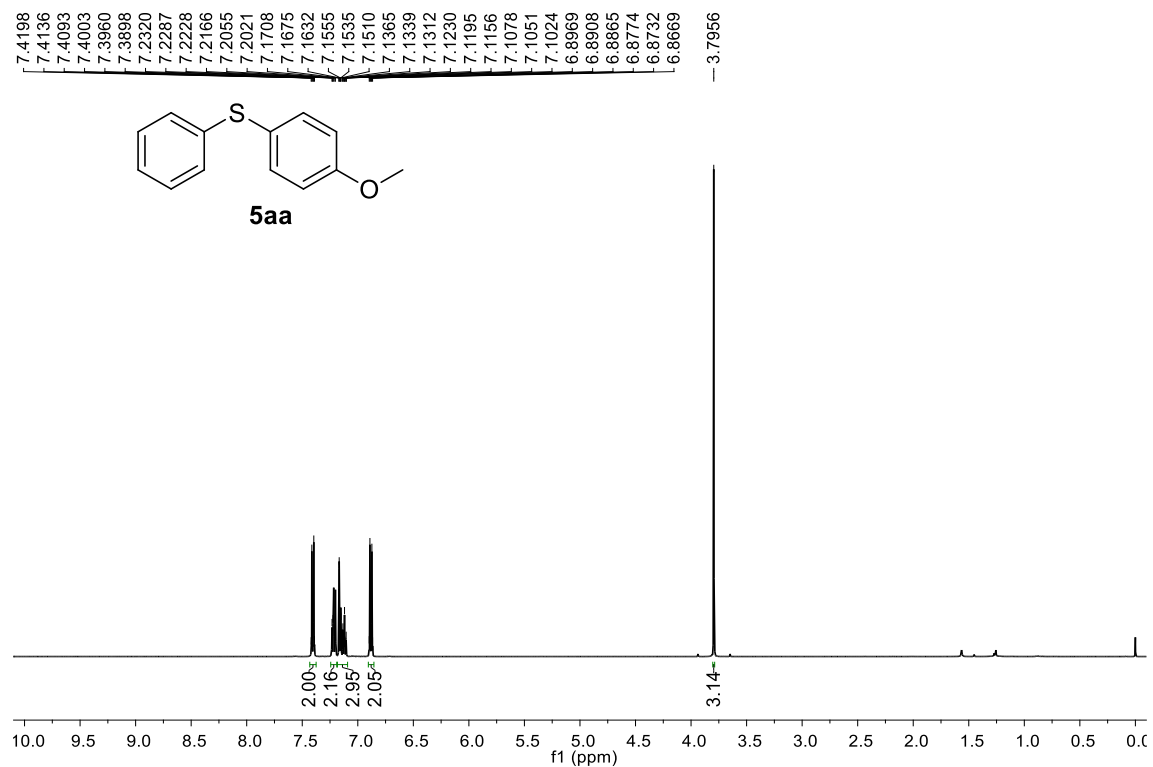

**Figure S57** <sup>1</sup>H NMR (500 MHz) spectrum of **5aa** in CDCl<sub>3</sub>

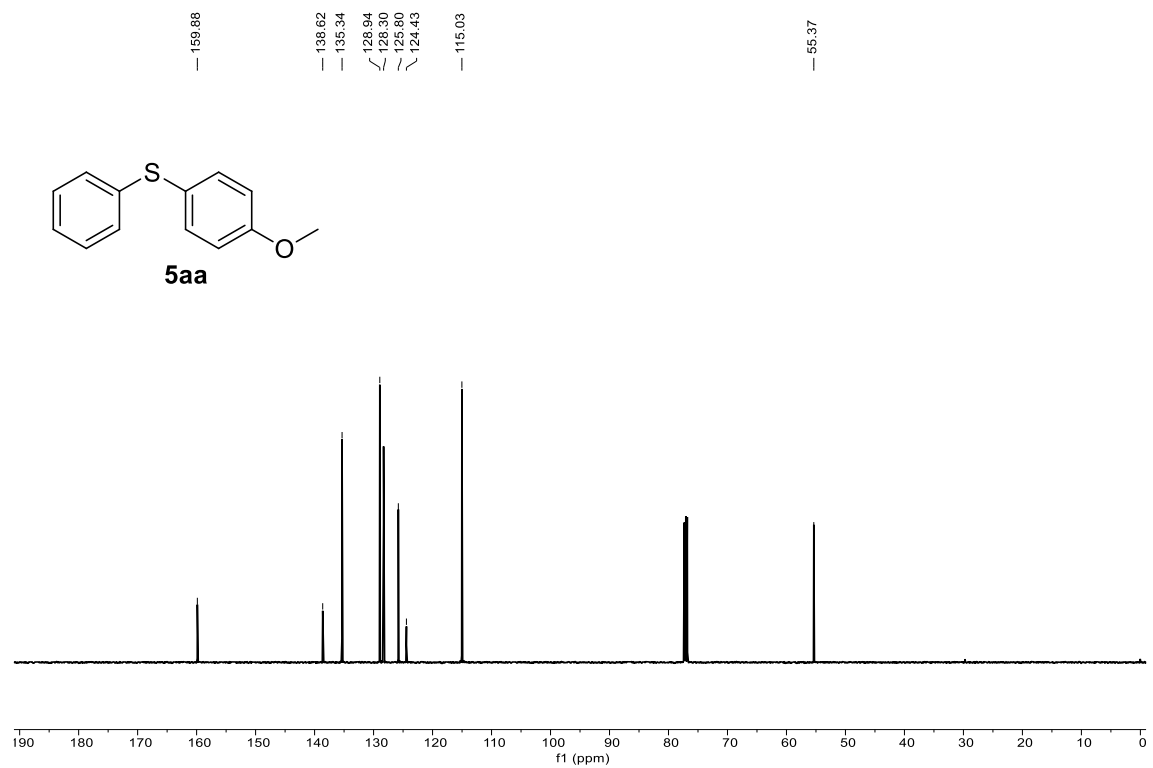

**Figure S58** <sup>13</sup>C NMR (125 MHz) spectrum of **5aa** in CDCl<sub>3</sub>

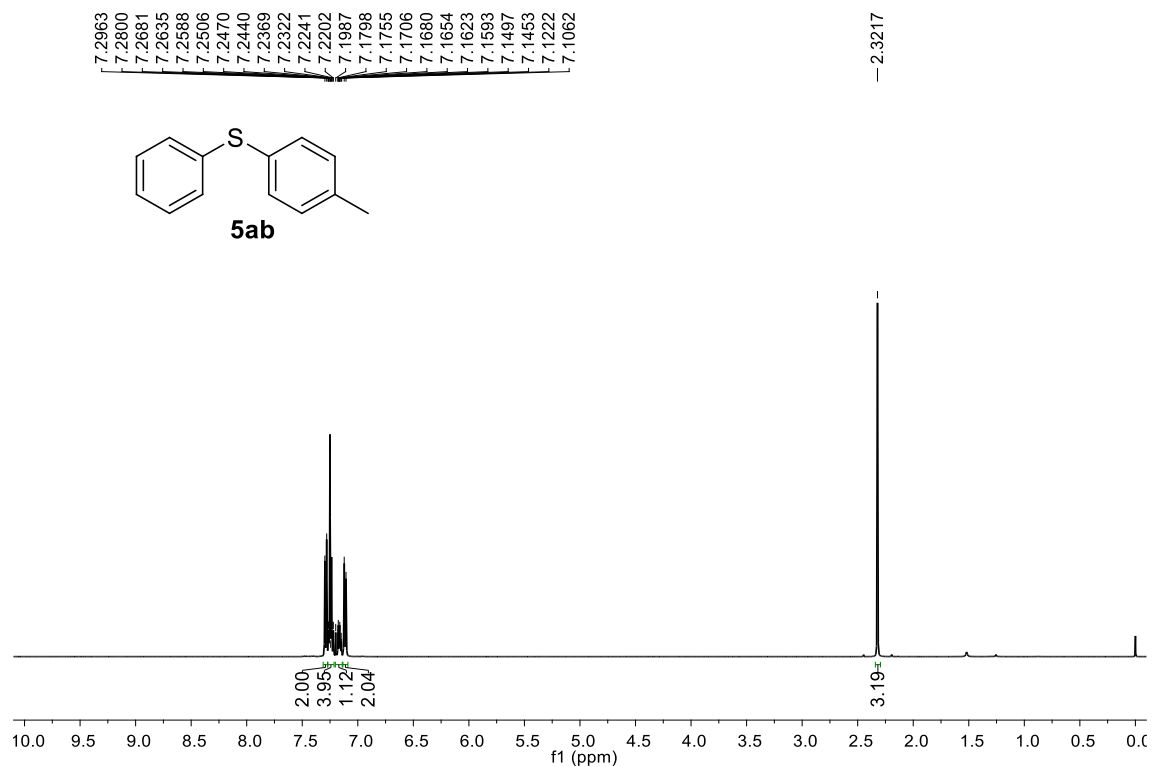

**Figure S59** <sup>1</sup>H NMR (500 MHz) spectrum of **5ab** in CDCl<sub>3</sub>

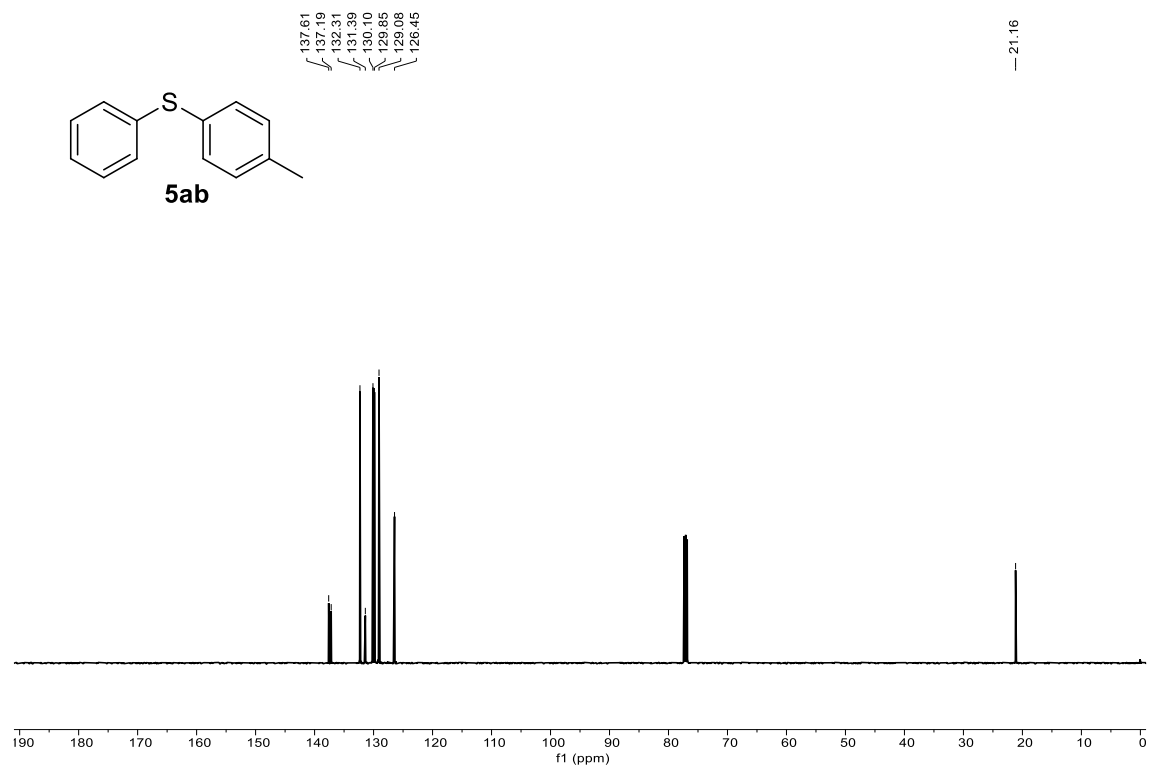

**Figure S60** <sup>13</sup>C NMR (125 MHz) spectrum of **5ab** in CDCl<sub>3</sub>

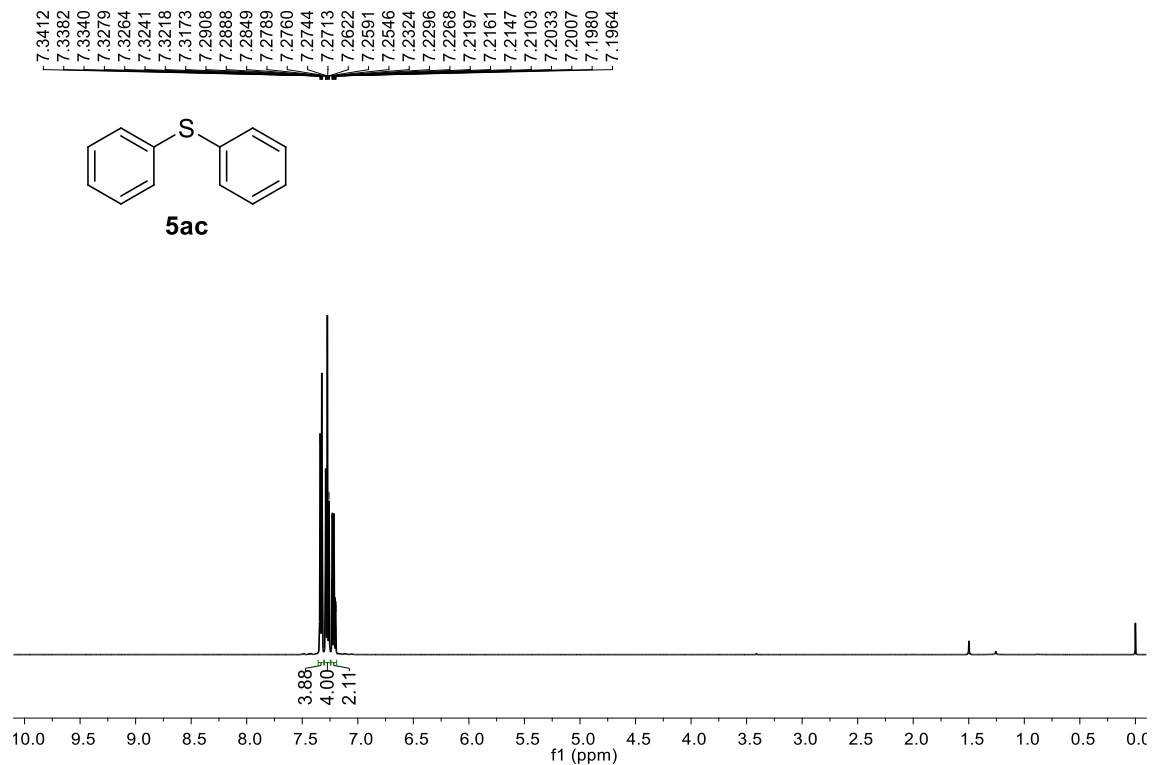

**Figure S61**  $^1\text{H}$  NMR (500 MHz) spectrum of **5ac** in  $\text{CDCl}_3$

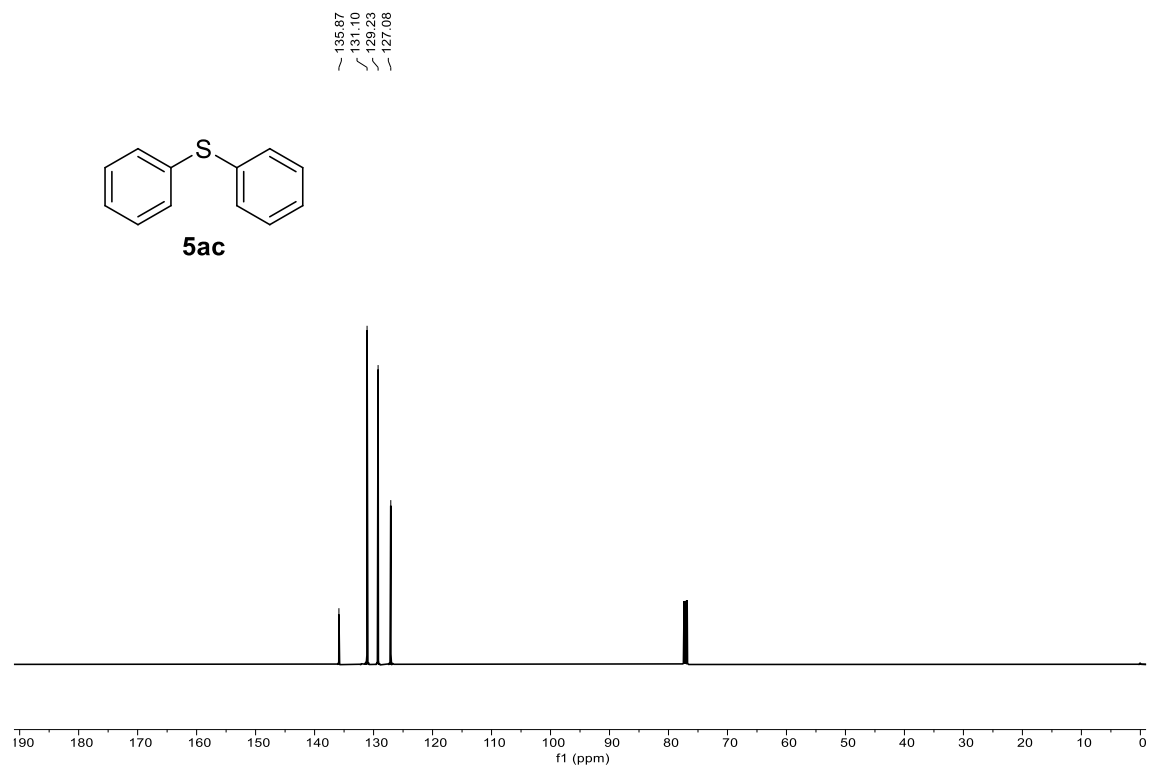

**Figure S62**  $^{13}\text{C}$  NMR (125 MHz) spectrum of **5ac** in  $\text{CDCl}_3$

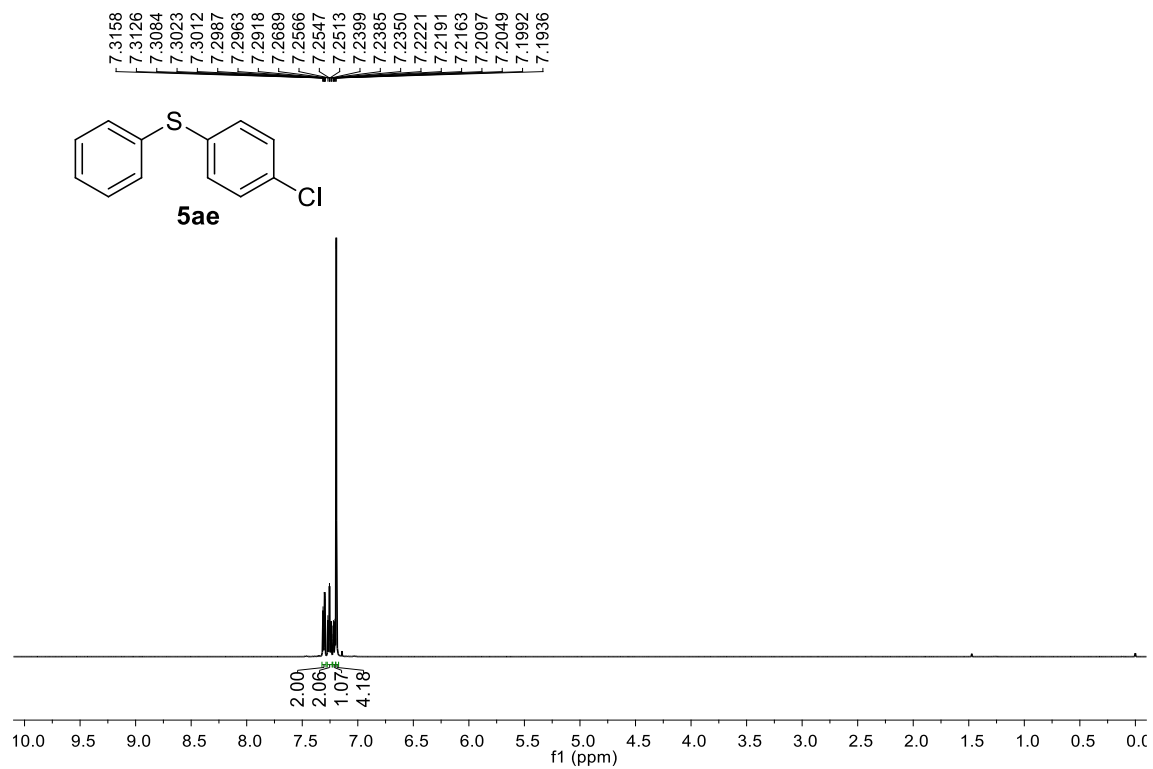

**Figure S63** <sup>1</sup>H NMR (500 MHz) spectrum of **5ae** in CDCl<sub>3</sub>

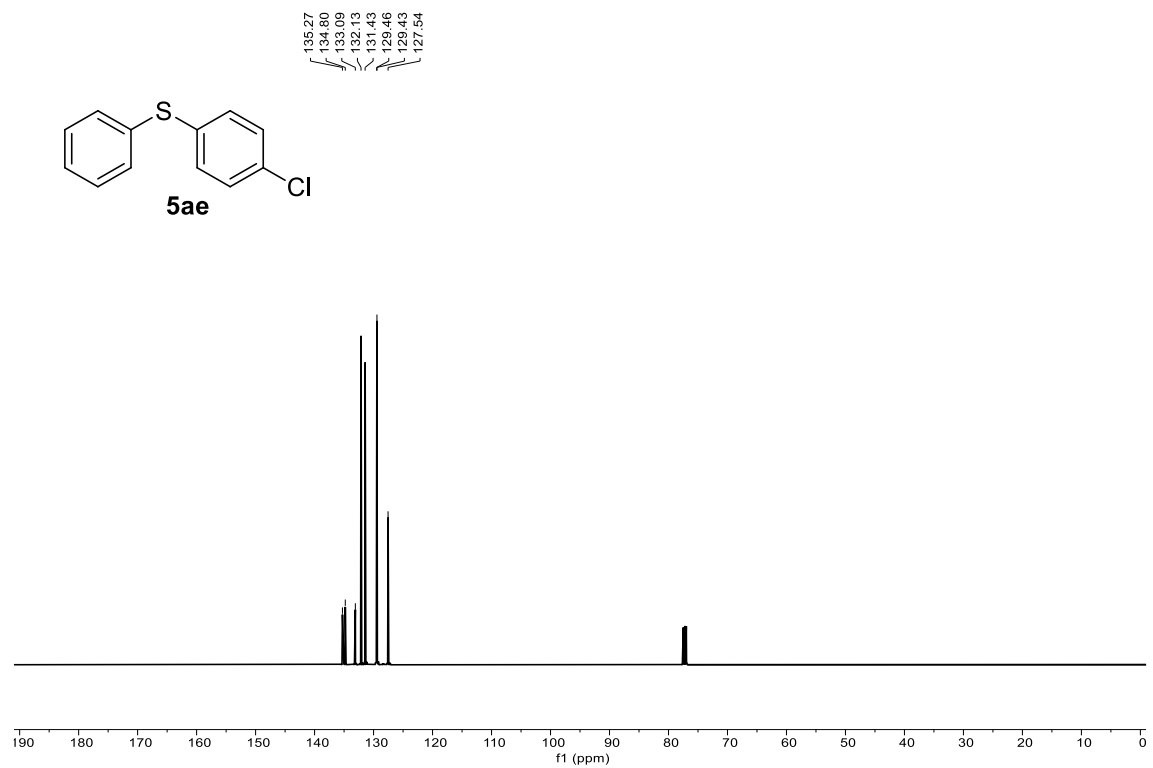

**Figure S64** <sup>13</sup>C NMR (125 MHz) spectrum of **5ae** in CDCl<sub>3</sub>



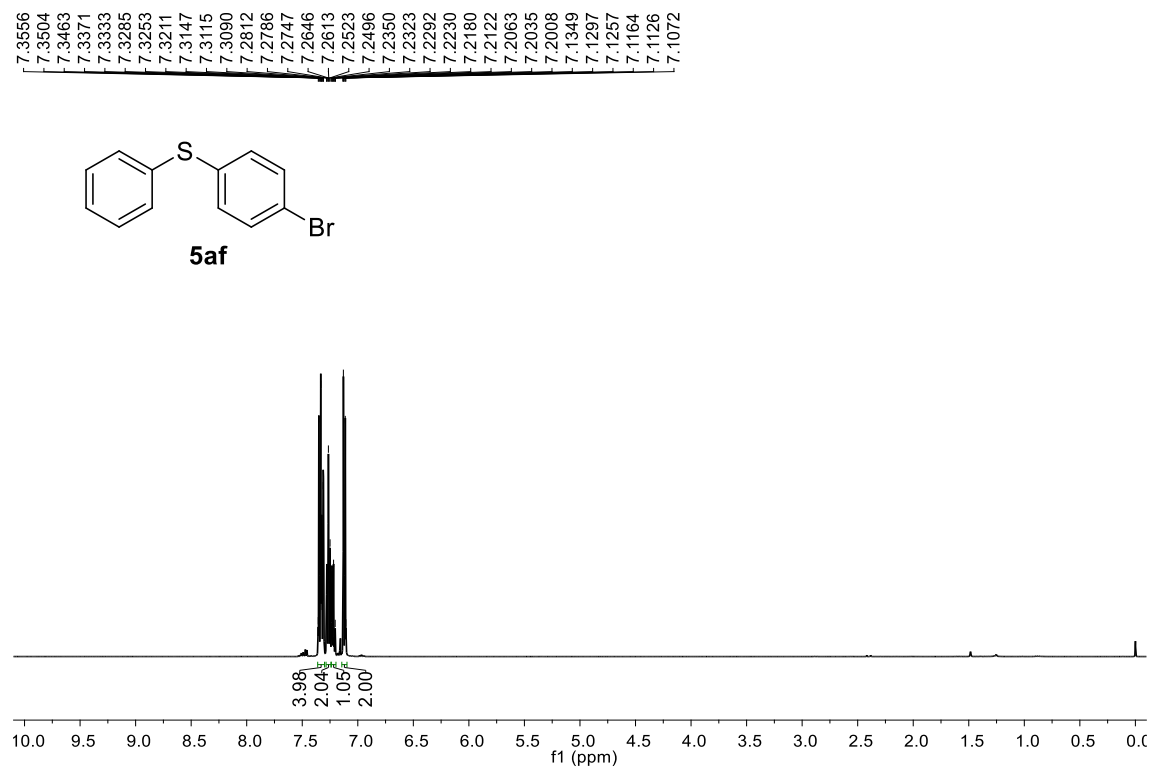

**Figure S65**  $^1\text{H}$  NMR (500 MHz) spectrum of **5af** in  $\text{CDCl}_3$

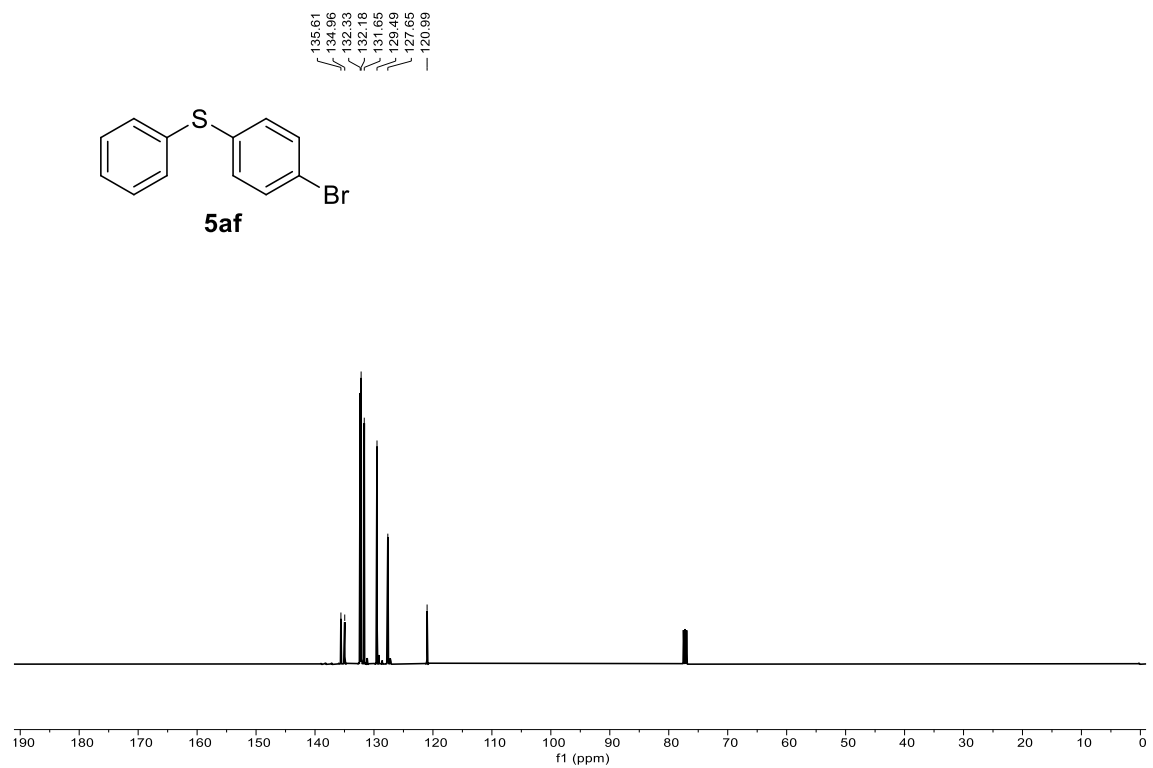

**Figure S66**  $^{13}\text{C}$  NMR (125 MHz) spectrum of **5af** in  $\text{CDCl}_3$

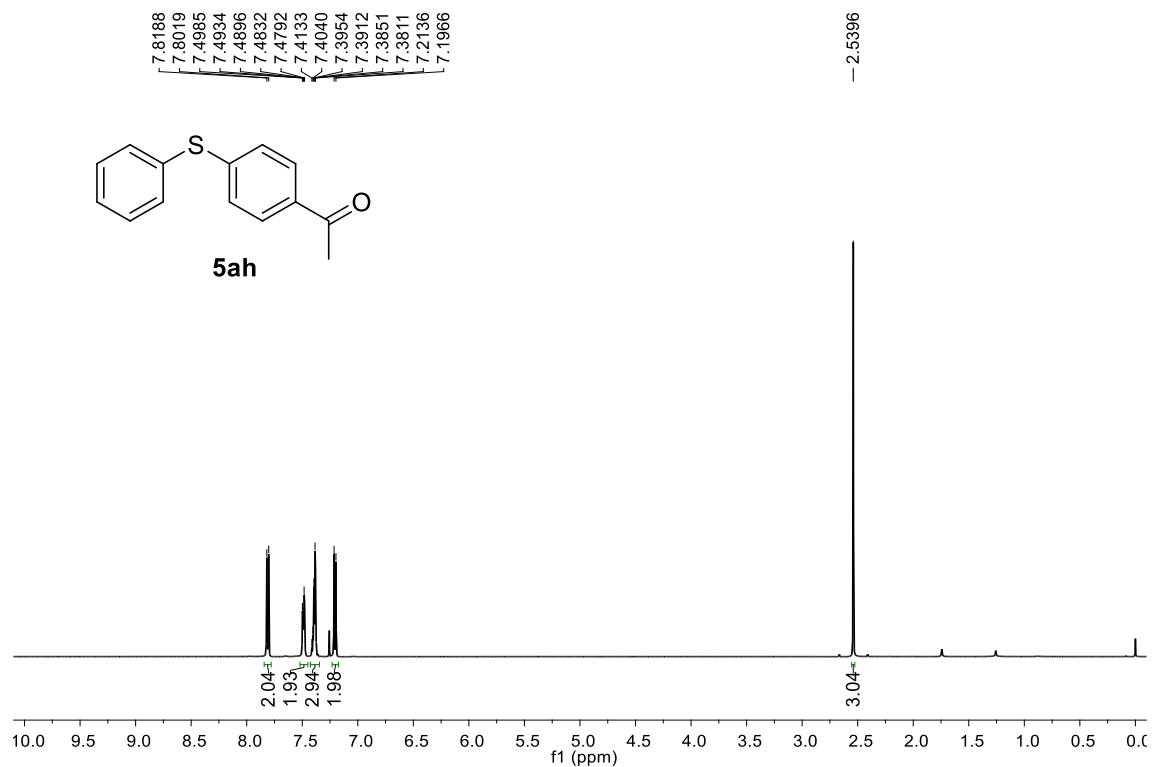

**Figure S67** <sup>1</sup>H NMR (500 MHz) spectrum of **5ah** in CDCl<sub>3</sub>

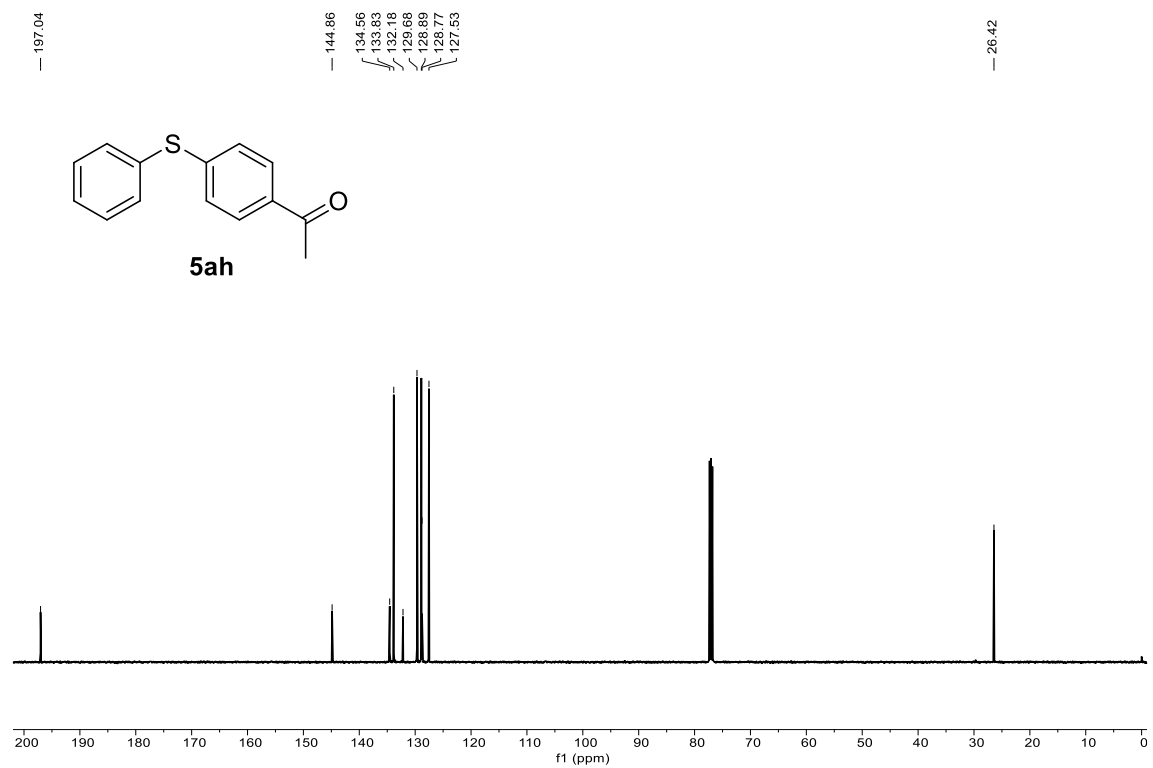

**Figure S68** <sup>13</sup>C NMR (125 MHz) spectrum of **5ah** in CDCl<sub>3</sub>

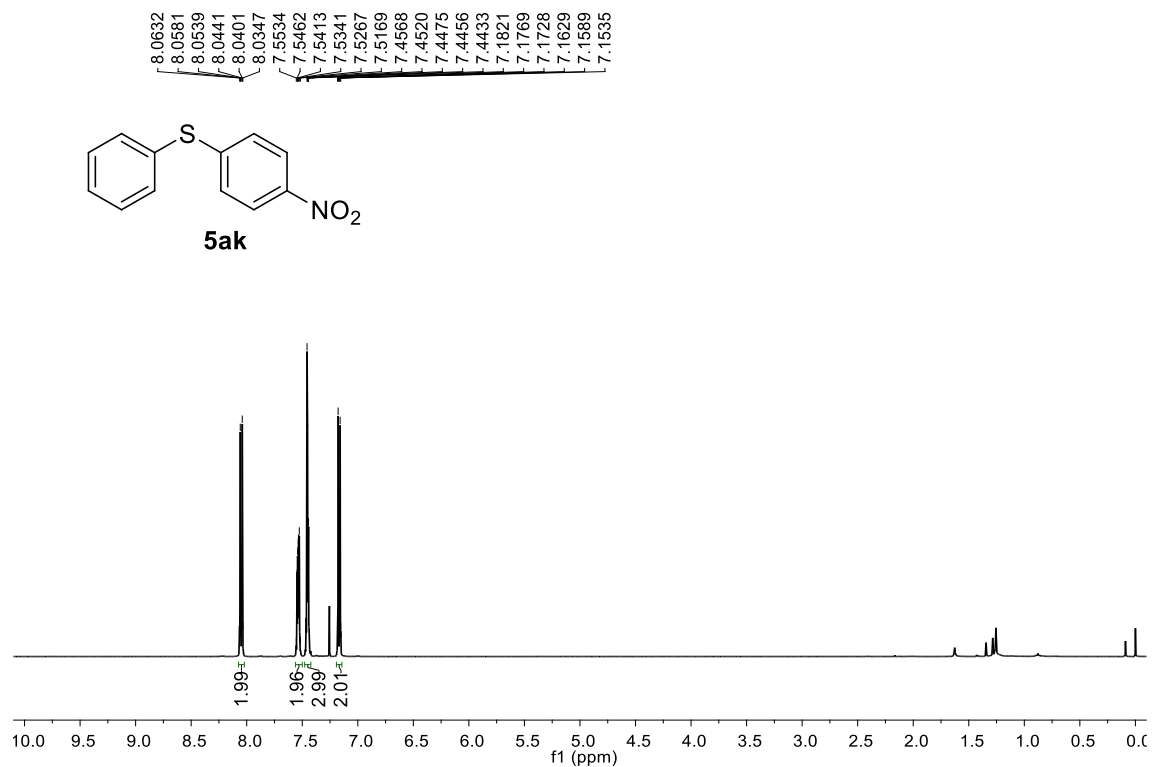

**Figure S69** <sup>1</sup>H NMR (500 MHz) spectrum of **5ak** in CDCl<sub>3</sub>

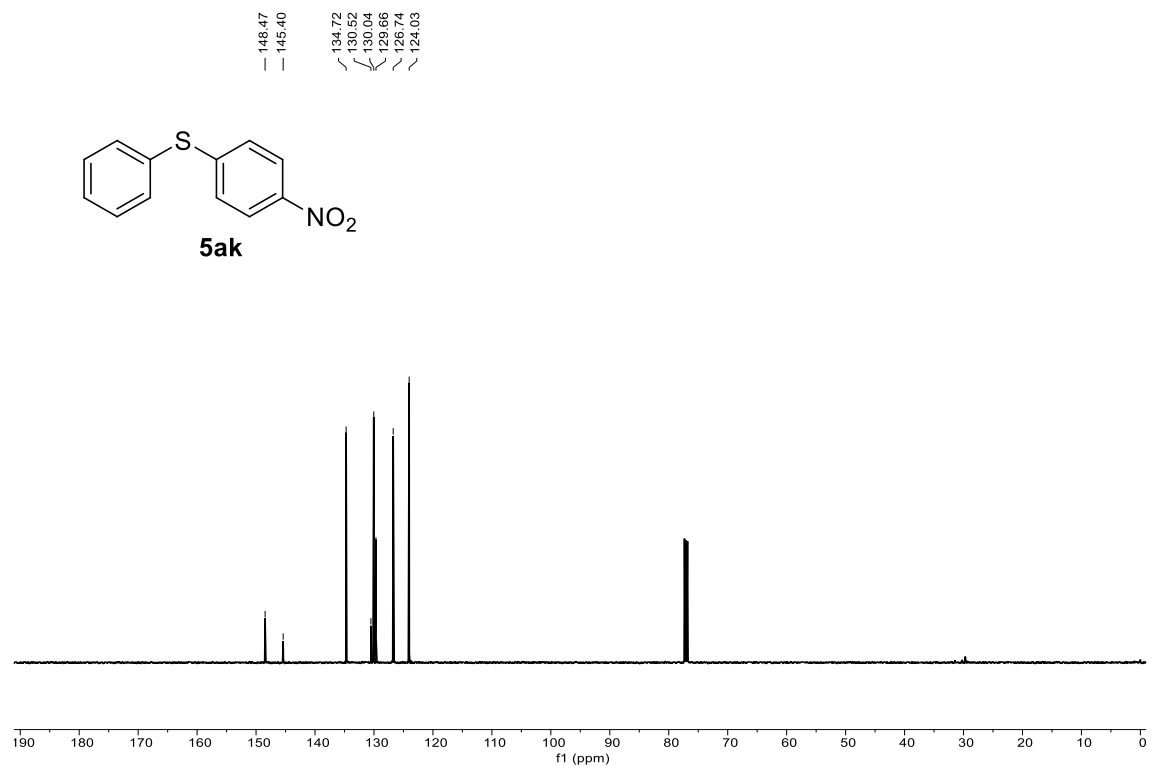

**Figure S70** <sup>13</sup>C NMR (125 MHz) spectrum of **5ak** in CDCl<sub>3</sub>

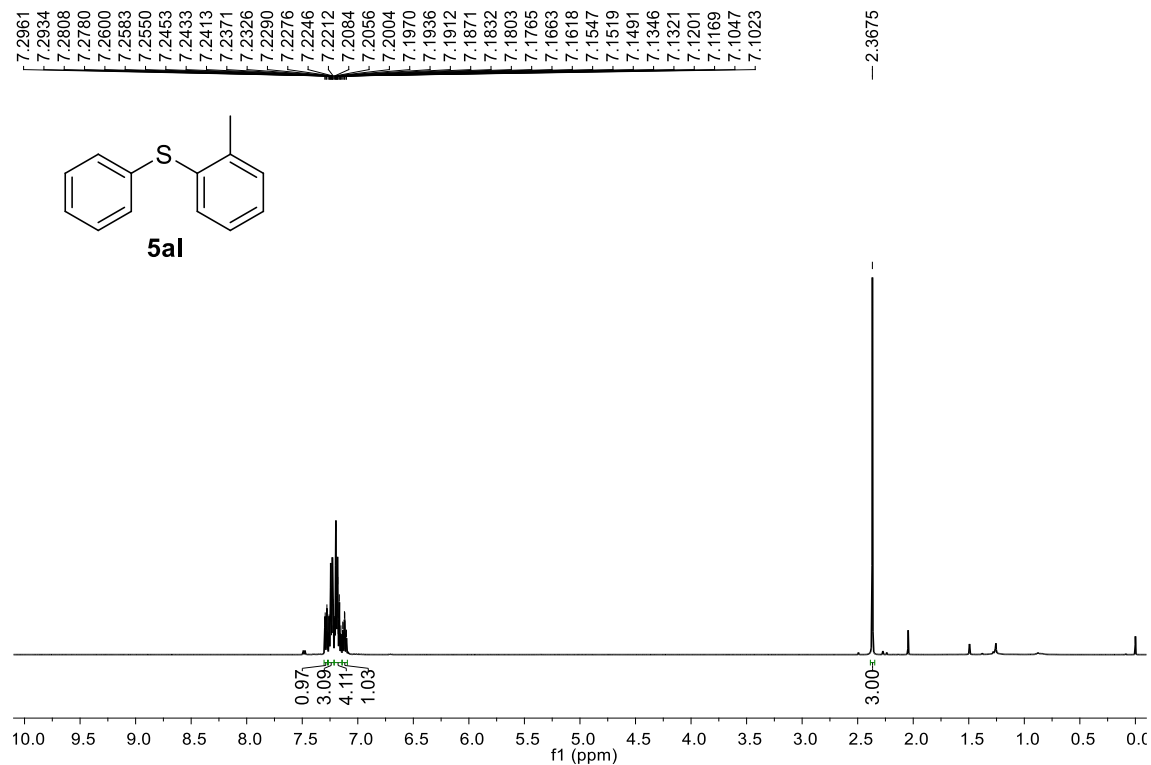

**Figure S71**  $^1\text{H}$  NMR (500 MHz) spectrum of **5al** in  $\text{CDCl}_3$

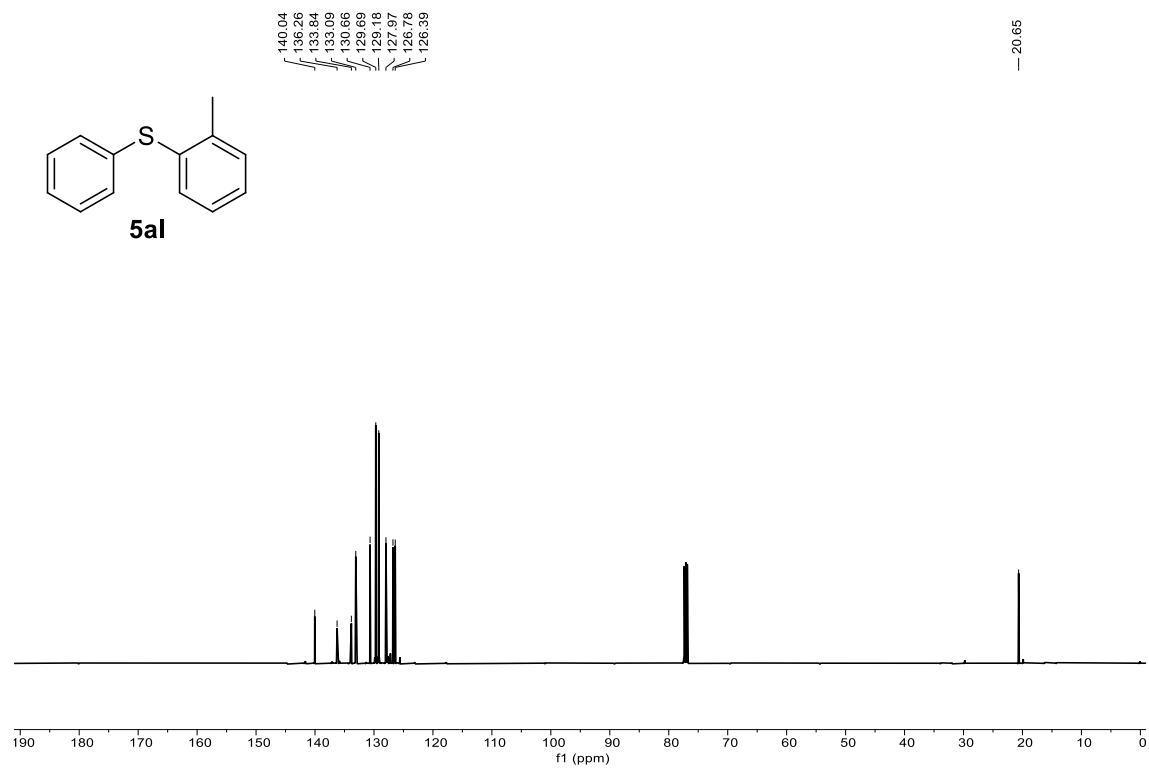

**Figure S72**  $^{13}\text{C}$  NMR (125 MHz) spectrum of **5al** in  $\text{CDCl}_3$

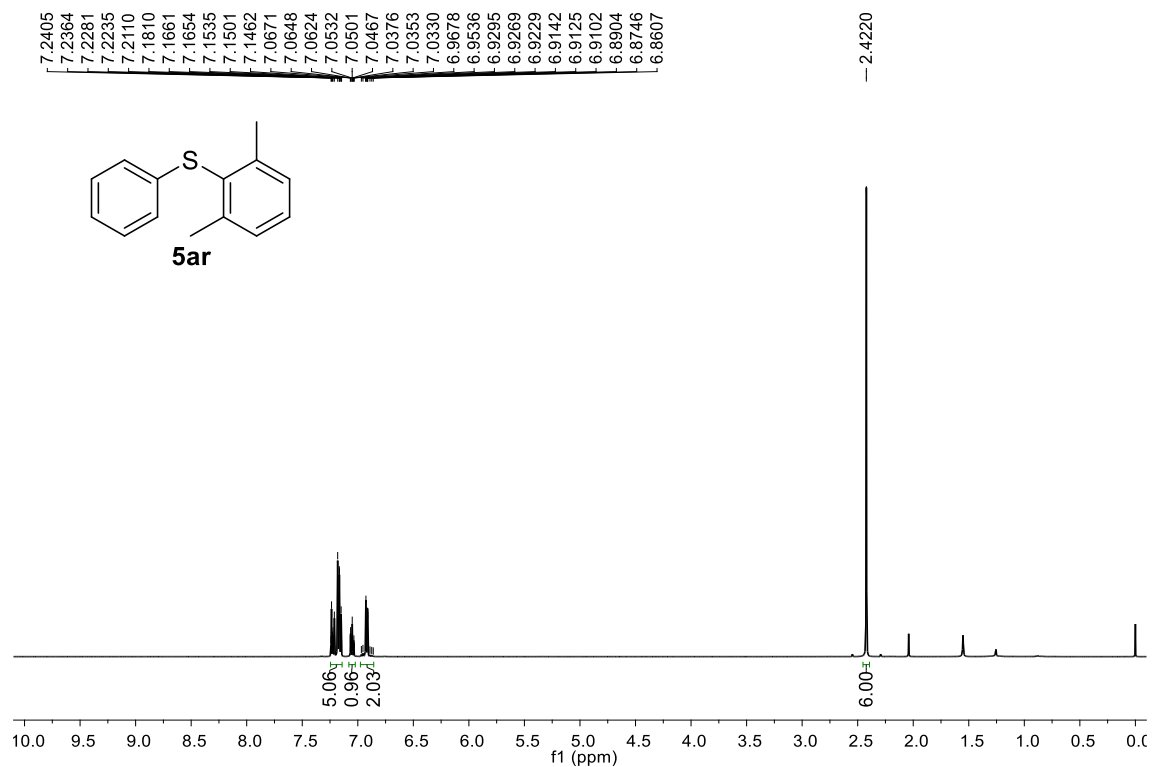

**Figure S73** <sup>1</sup>H NMR (500 MHz) spectrum of **5ar** in CDCl<sub>3</sub>

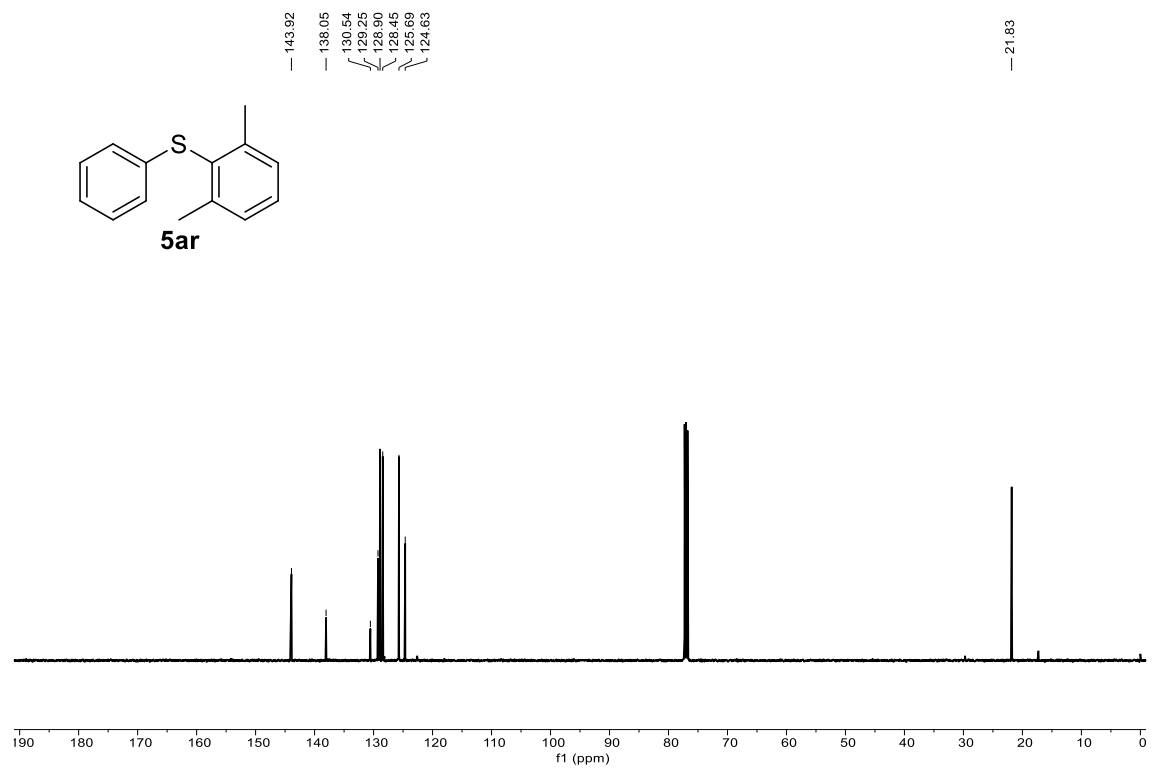

**Figure S74** <sup>13</sup>C NMR (125 MHz) spectrum of **5ar** in CDCl<sub>3</sub>

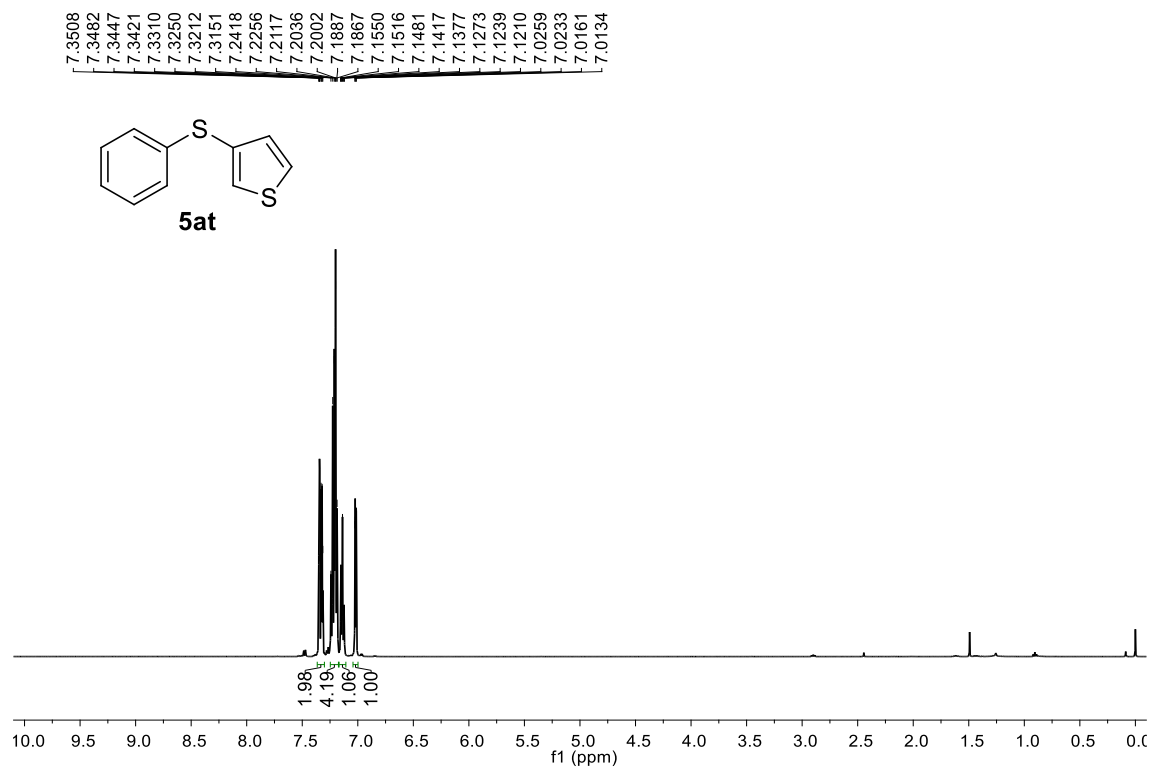

**Figure S75**  $^1\text{H}$  NMR (500 MHz) spectrum of **5at** in  $\text{CDCl}_3$

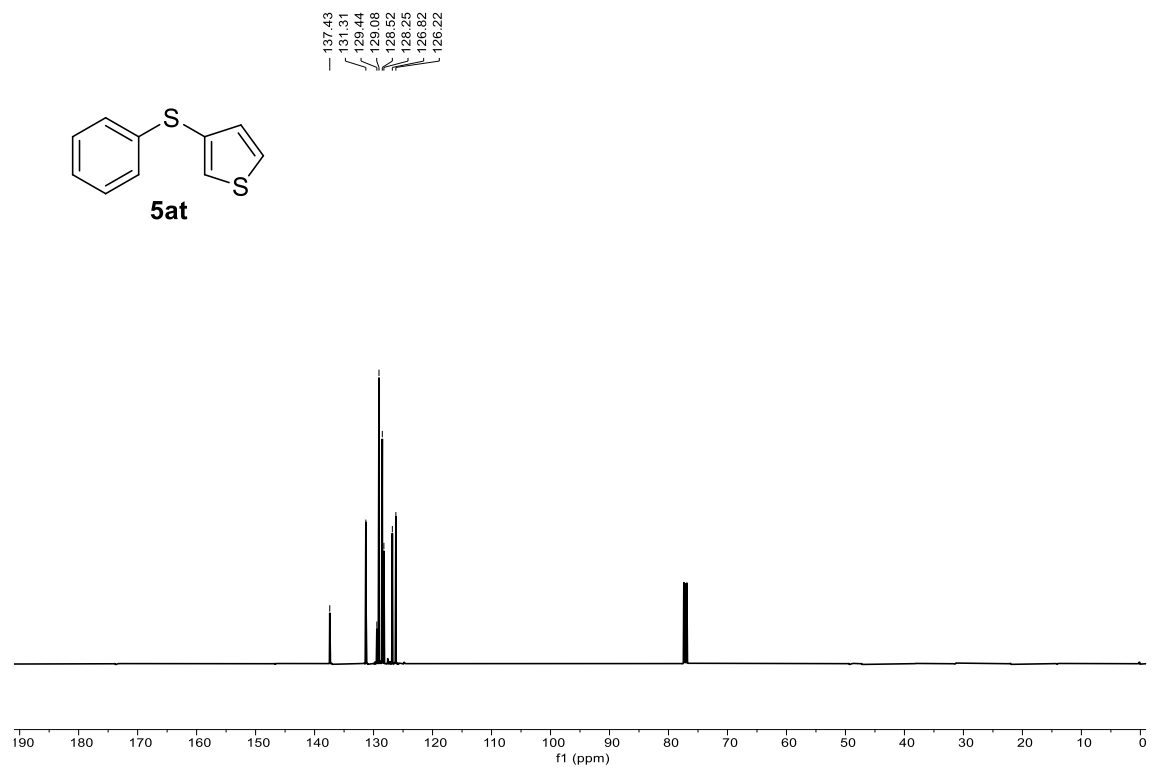

**Figure S76**  $^{13}\text{C}$  NMR (125 MHz) spectrum of **5at** in  $\text{CDCl}_3$

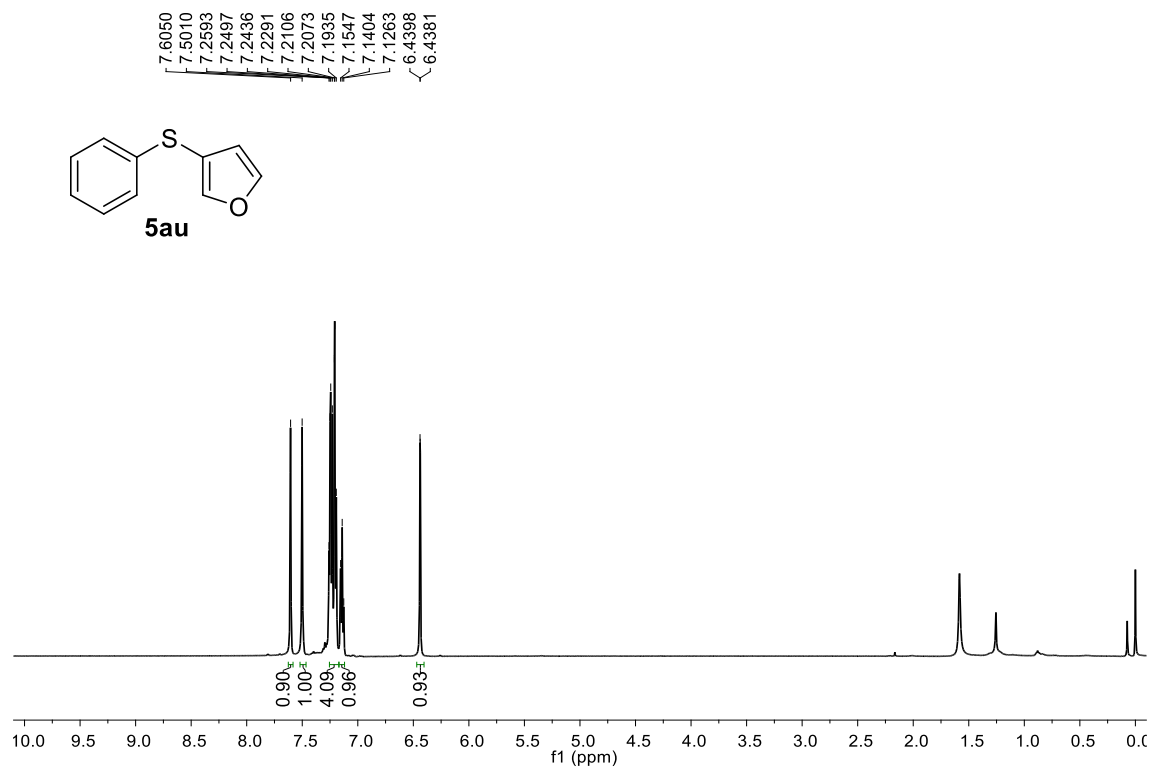

**Figure S77**  $^1\text{H}$  NMR (500 MHz) spectrum of **5au** in  $\text{CDCl}_3$

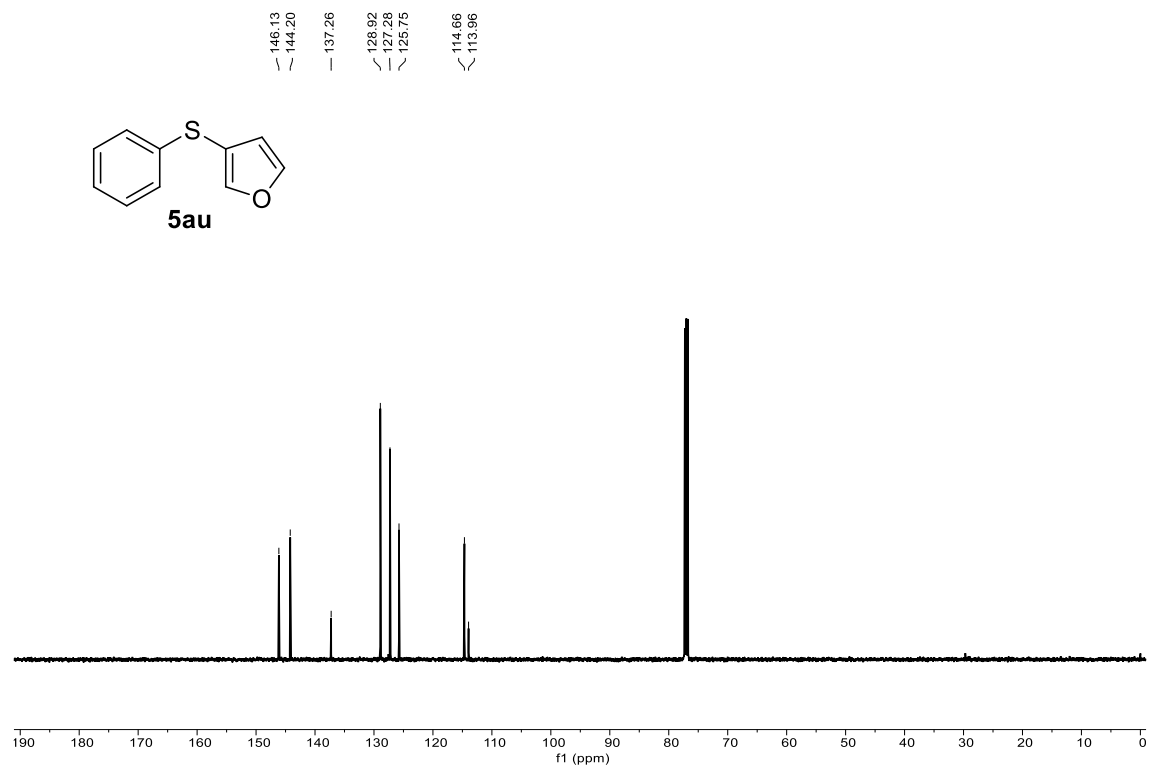

**Figure S78**  $^{13}\text{C}$  NMR (125 MHz) spectrum of **5au** in  $\text{CDCl}_3$

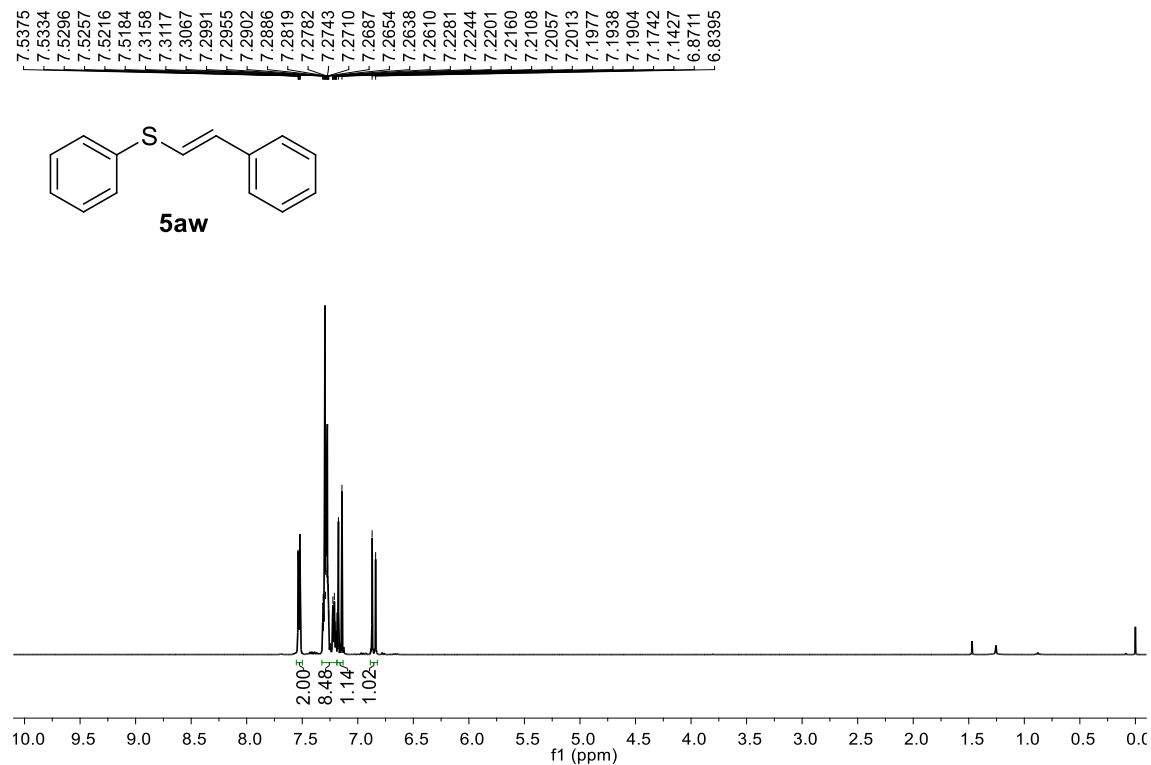

**Figure S79**  $^1\text{H}$  NMR (500 MHz) spectrum of **5aw** in  $\text{CDCl}_3$

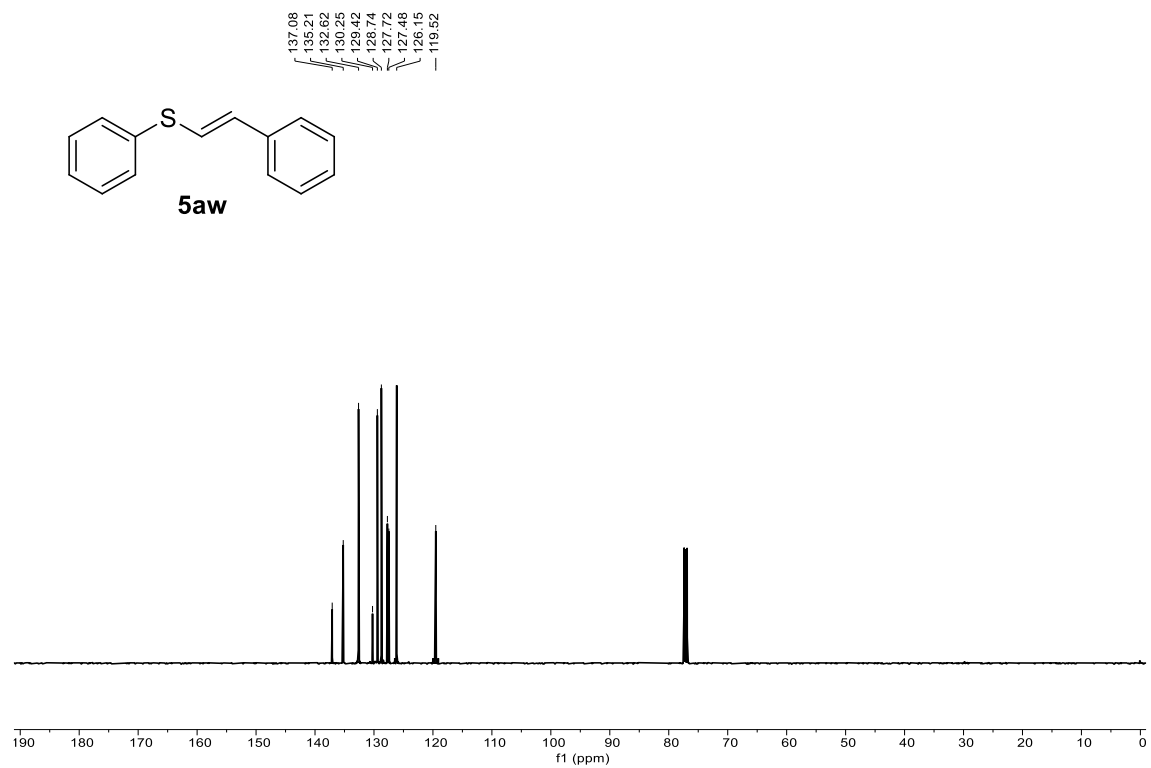

**Figure S80**  $^{13}\text{C}$  NMR (125 MHz) spectrum of **5aw** in  $\text{CDCl}_3$



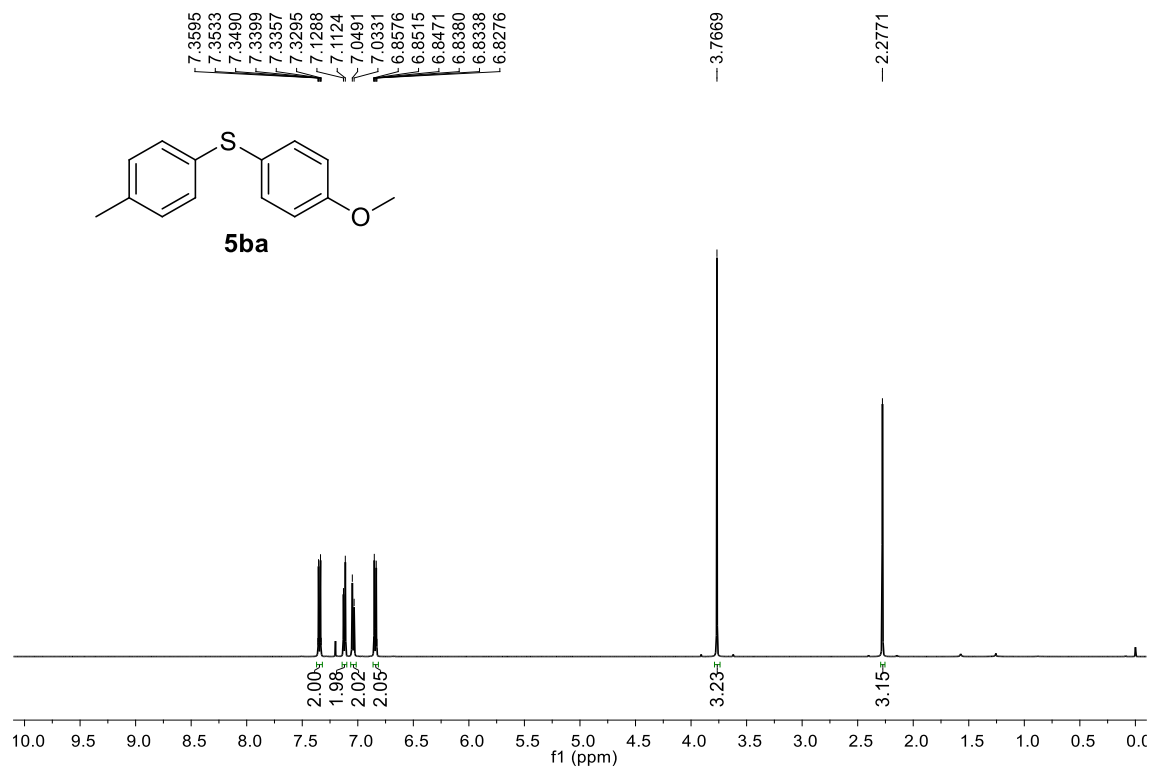

**Figure S81** <sup>1</sup>H NMR (500 MHz) spectrum of **5ba** in CDCl<sub>3</sub>

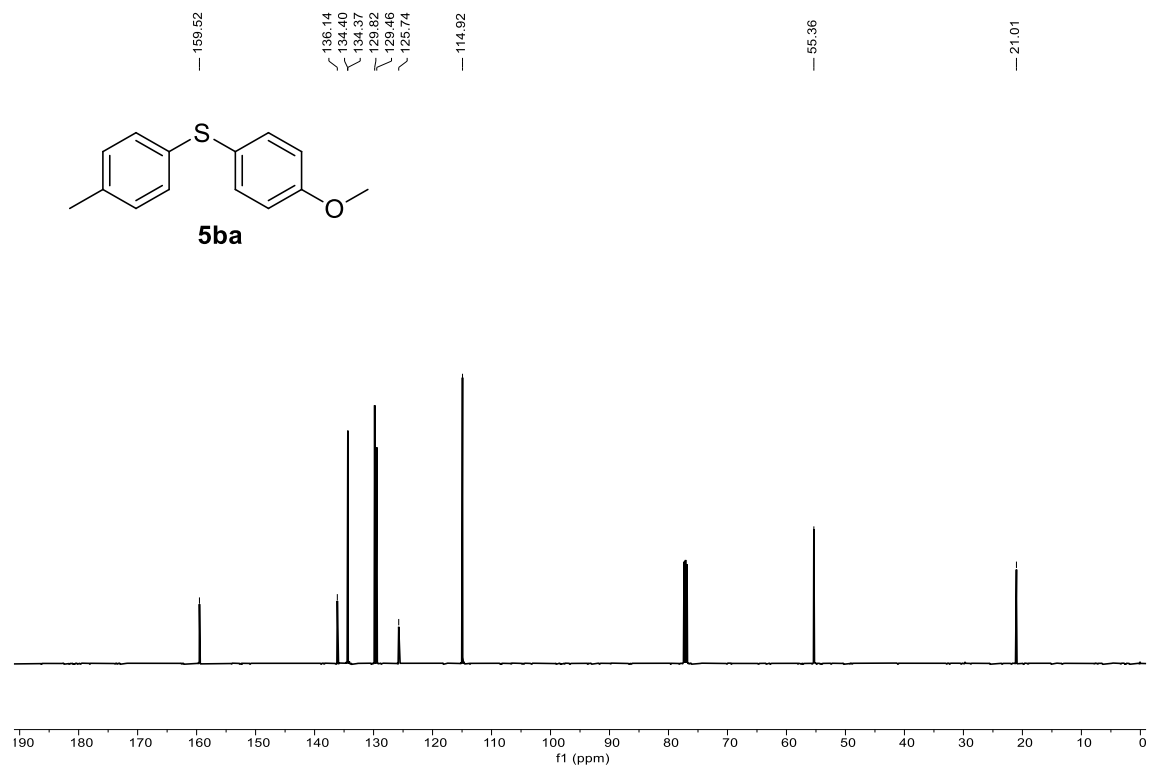

**Figure S82** <sup>13</sup>C NMR (125 MHz) spectrum of **5ba** in CDCl<sub>3</sub>

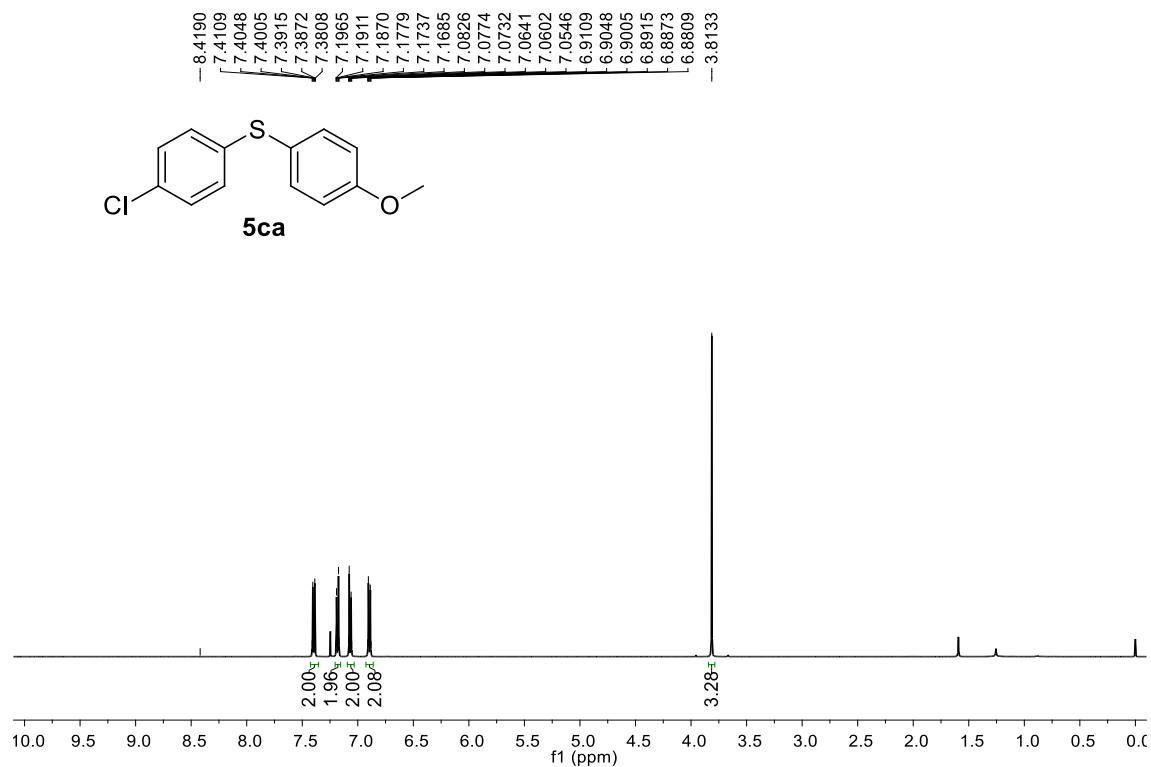

**Figure S83**  $^1\text{H}$  NMR (500 MHz) spectrum of **5ca** in  $\text{CDCl}_3$

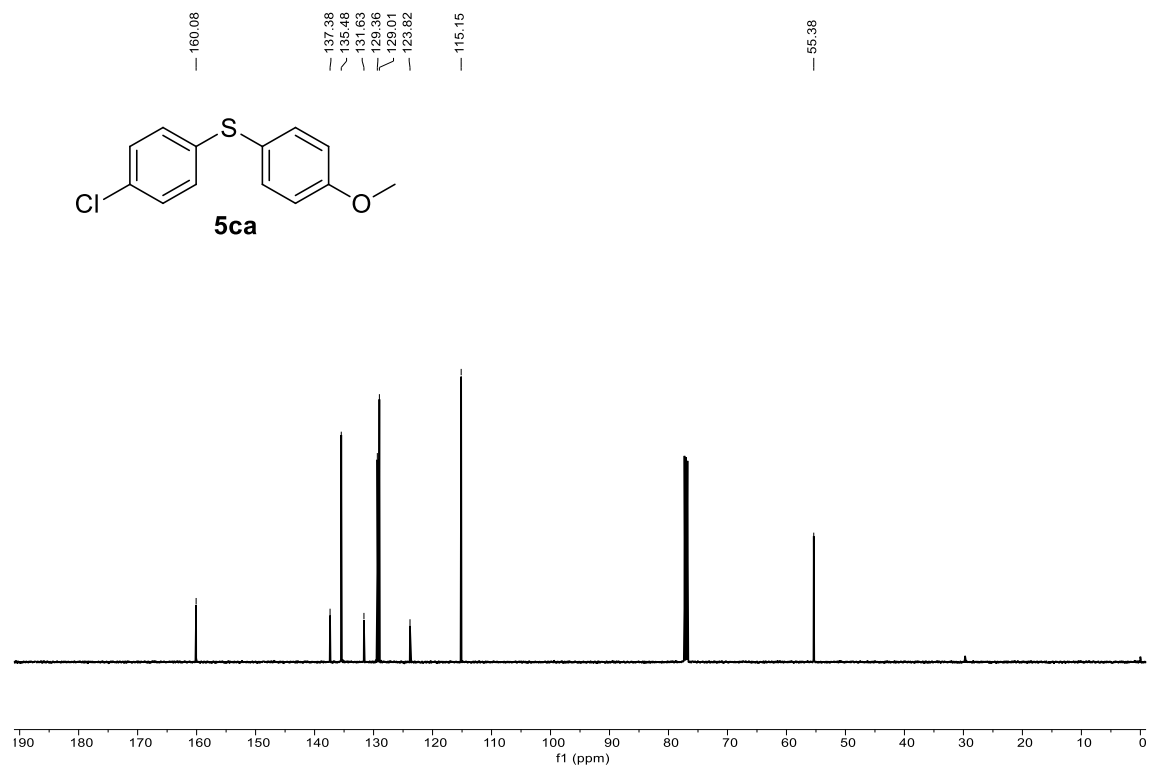

**Figure S84**  $^{13}\text{C}$  NMR (125 MHz) spectrum of **5ca** in  $\text{CDCl}_3$

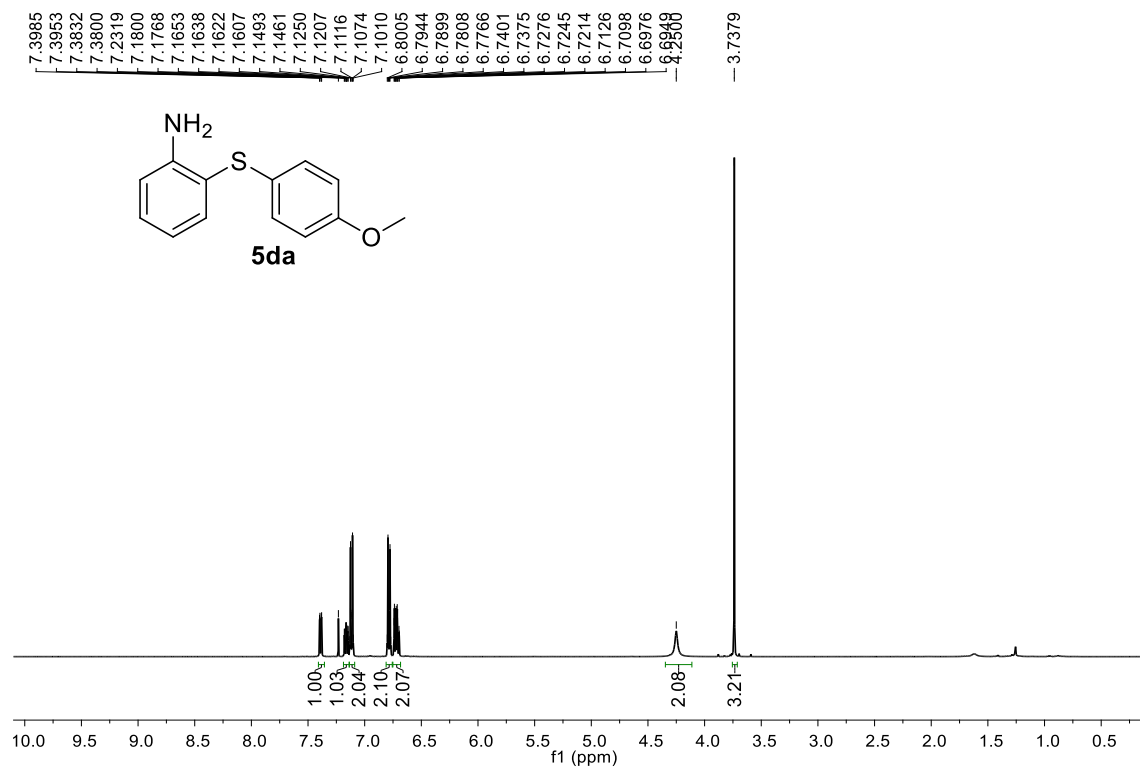

**Figure S85** <sup>1</sup>H NMR (500 MHz) spectrum of **5da** in CDCl<sub>3</sub>

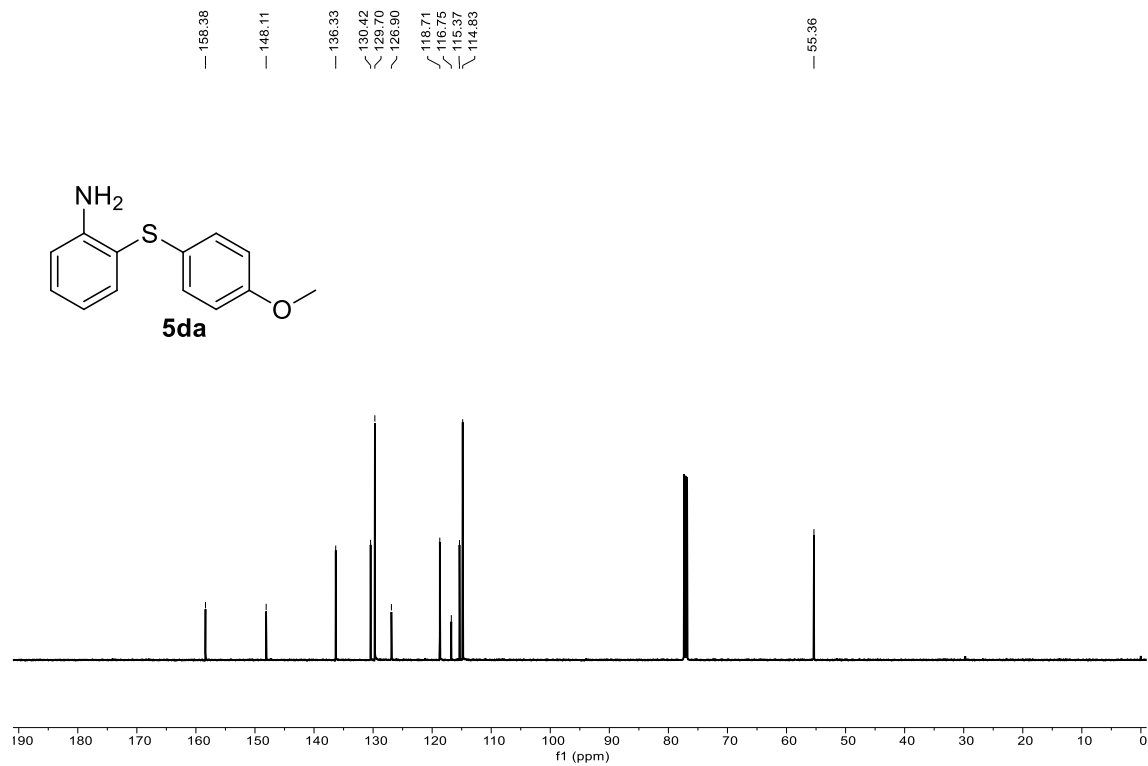

**Figure S86** <sup>13</sup>C NMR (125 MHz) spectrum of **5da** in CDCl<sub>3</sub>

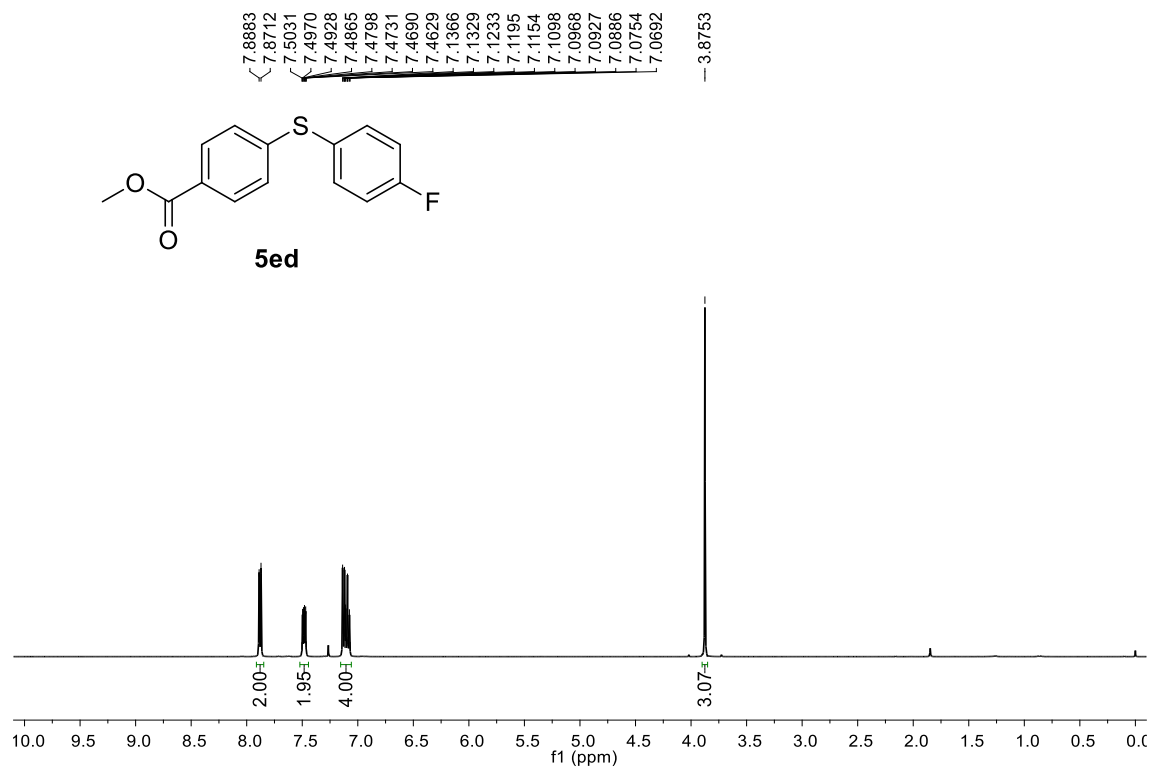

**Figure S87**  $^1\text{H}$  NMR (500 MHz) spectrum of **5ed** in  $\text{CDCl}_3$

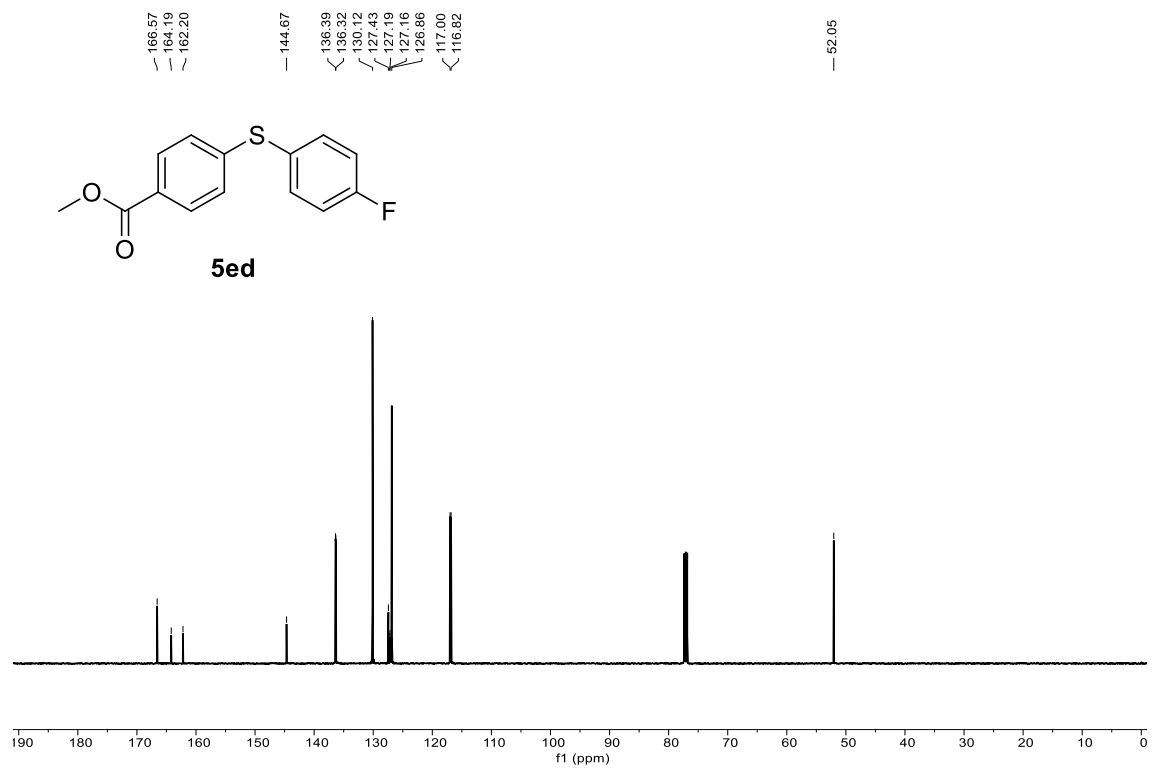

**Figure S88**  $^{13}\text{C}$  NMR (125 MHz) spectrum of **5ed** in  $\text{CDCl}_3$

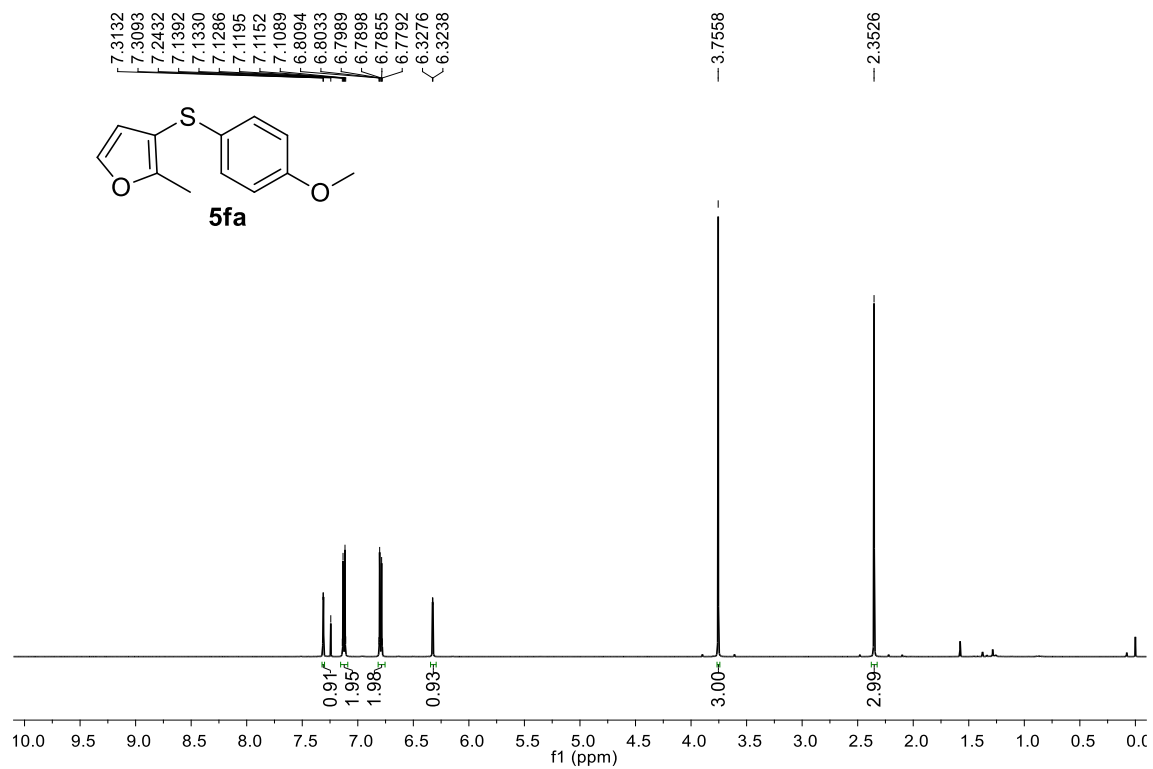

**Figure S89** <sup>1</sup>H NMR (500 MHz) spectrum of **5fa** in CDCl<sub>3</sub>

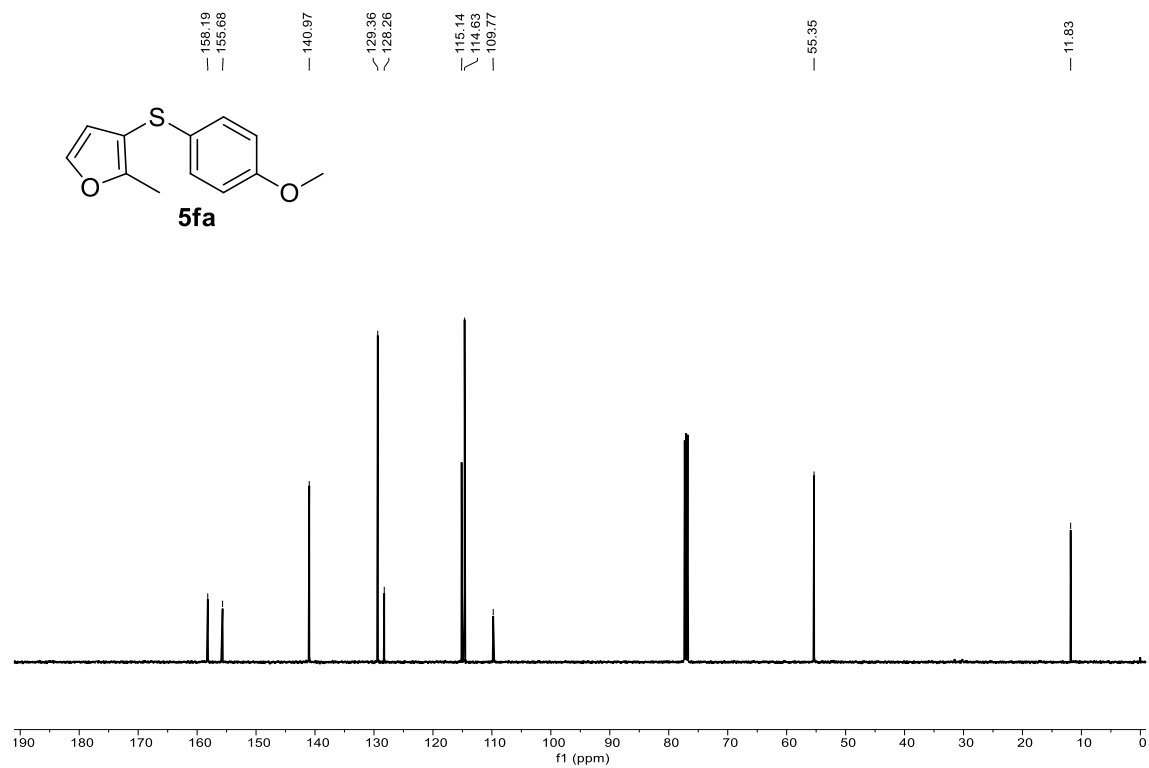

**Figure S90** <sup>13</sup>C NMR (125 MHz) spectrum of **5fa** in CDCl<sub>3</sub>

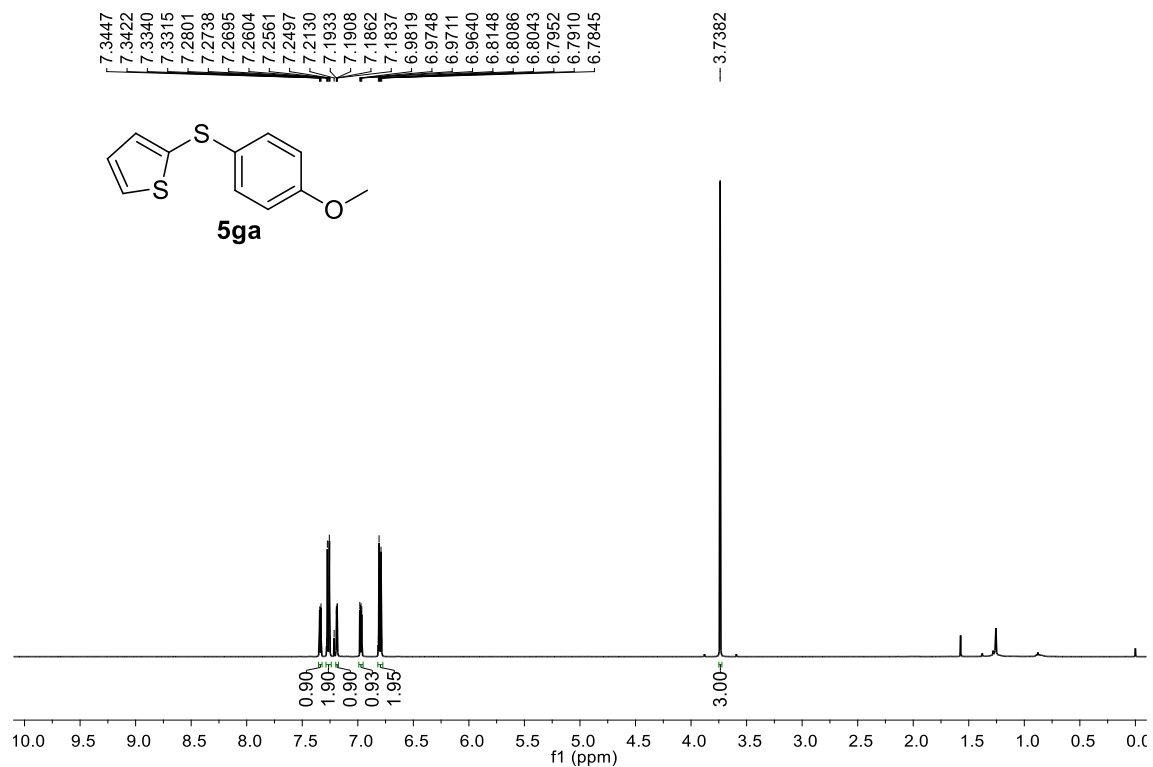

**Figure S91** <sup>1</sup>H NMR (500 MHz) spectrum of **5ga** in CDCl<sub>3</sub>

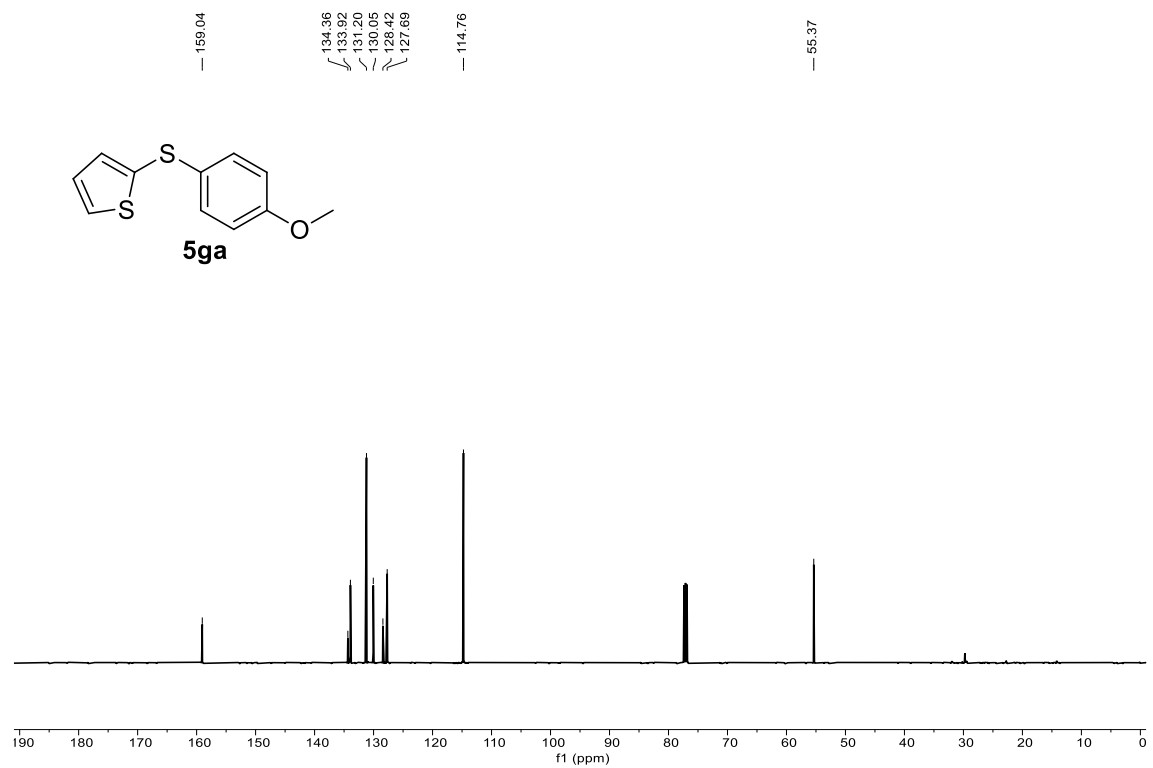

**Figure S92** <sup>13</sup>C NMR (125 MHz) spectrum of **5ga** in CDCl<sub>3</sub>

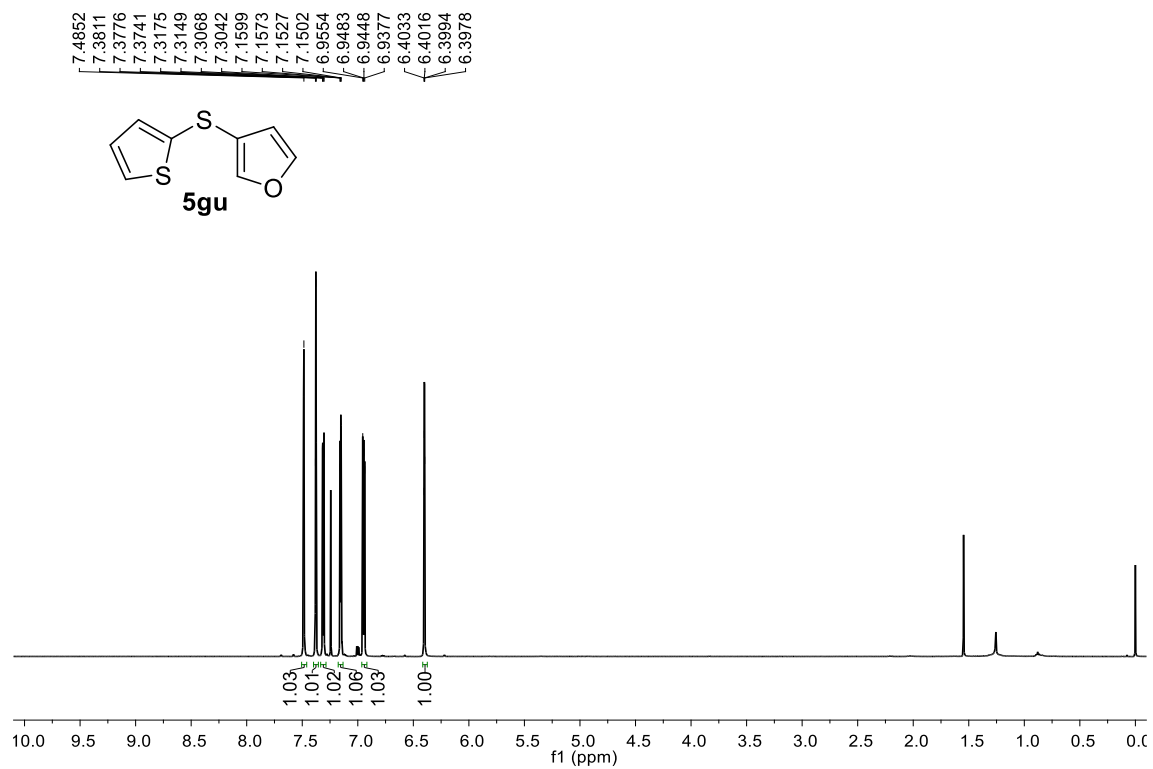

**Figure S93**  $^1\text{H}$  NMR (500 MHz) spectrum of **5gu** in  $\text{CDCl}_3$

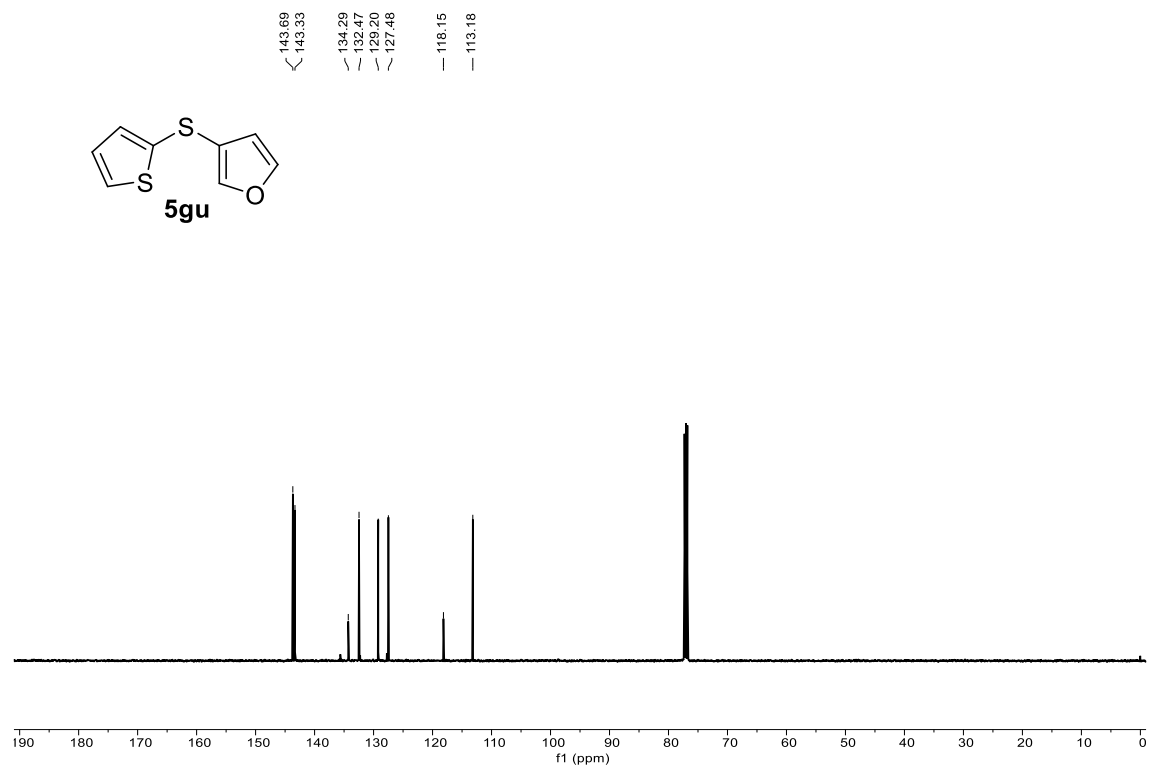

**Figure S94**  $^{13}\text{C}$  NMR (125 MHz) spectrum of **5gu** in  $\text{CDCl}_3$

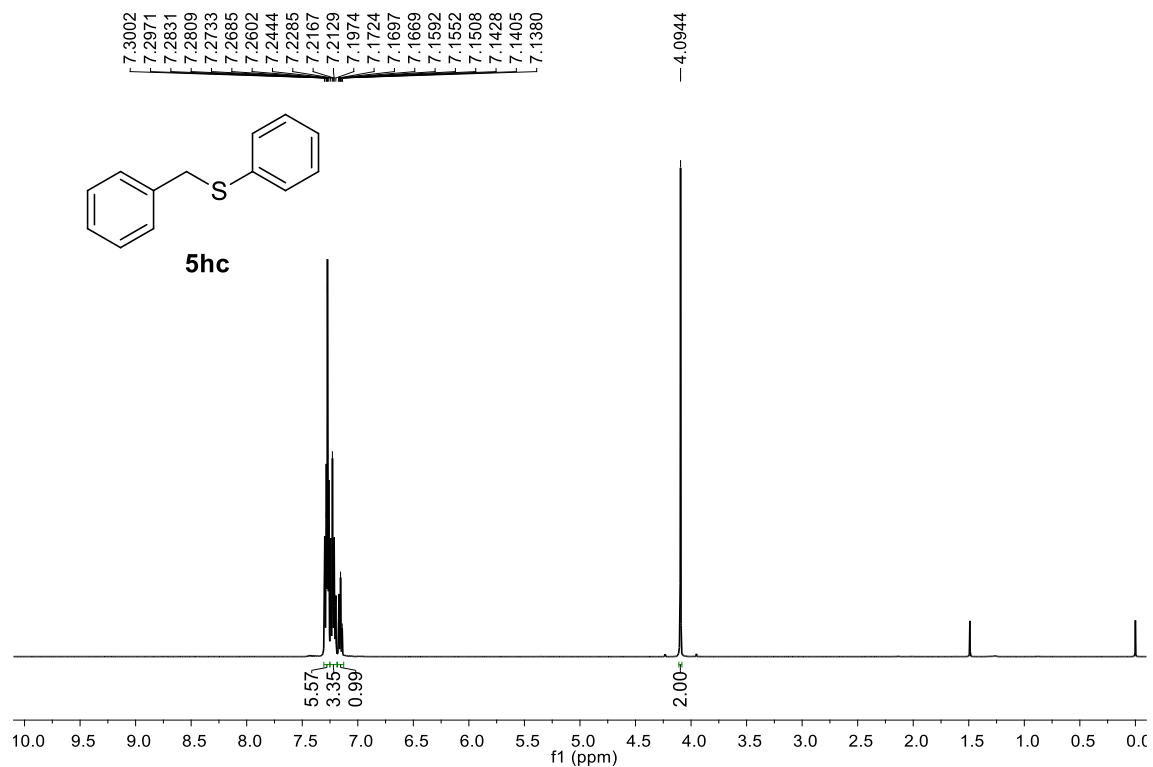

**Figure S95** <sup>1</sup>H NMR (500 MHz) spectrum of **5hc** in CDCl<sub>3</sub>

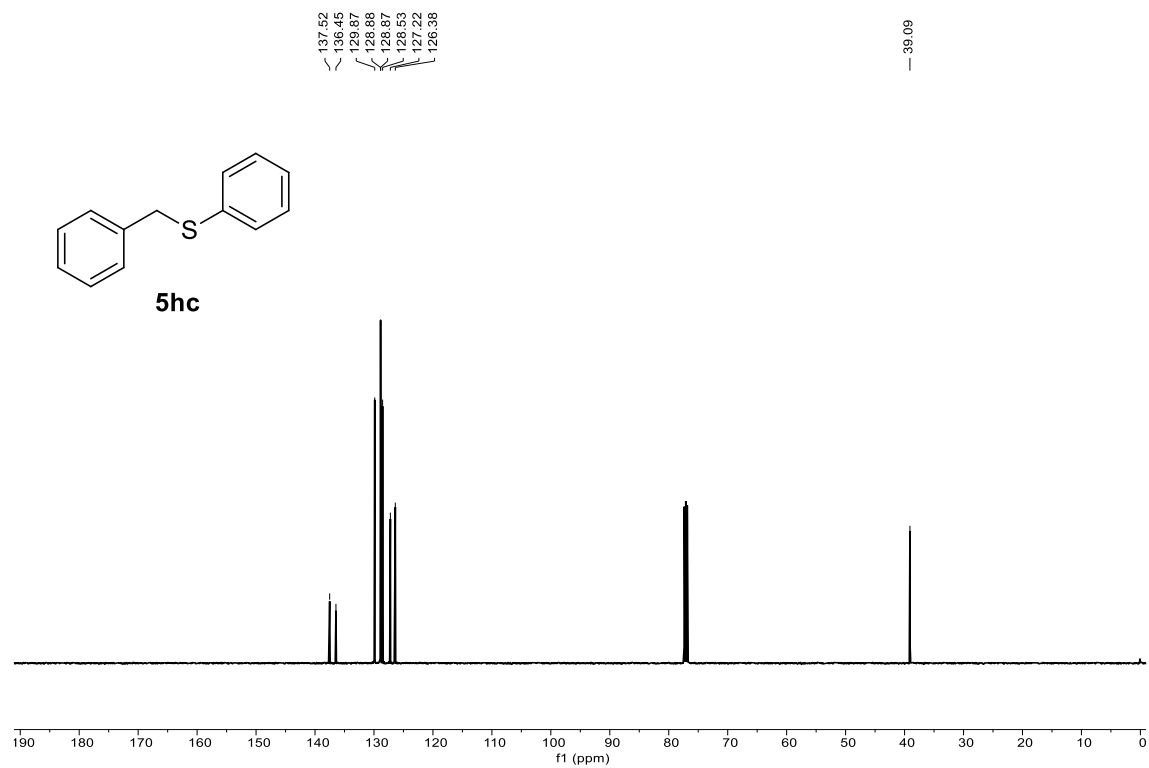

**Figure S96** <sup>13</sup>C NMR (125 MHz) spectrum of **5hc** in CDCl<sub>3</sub>



#### 4. $^{77}\text{Se}$ NMR spectra

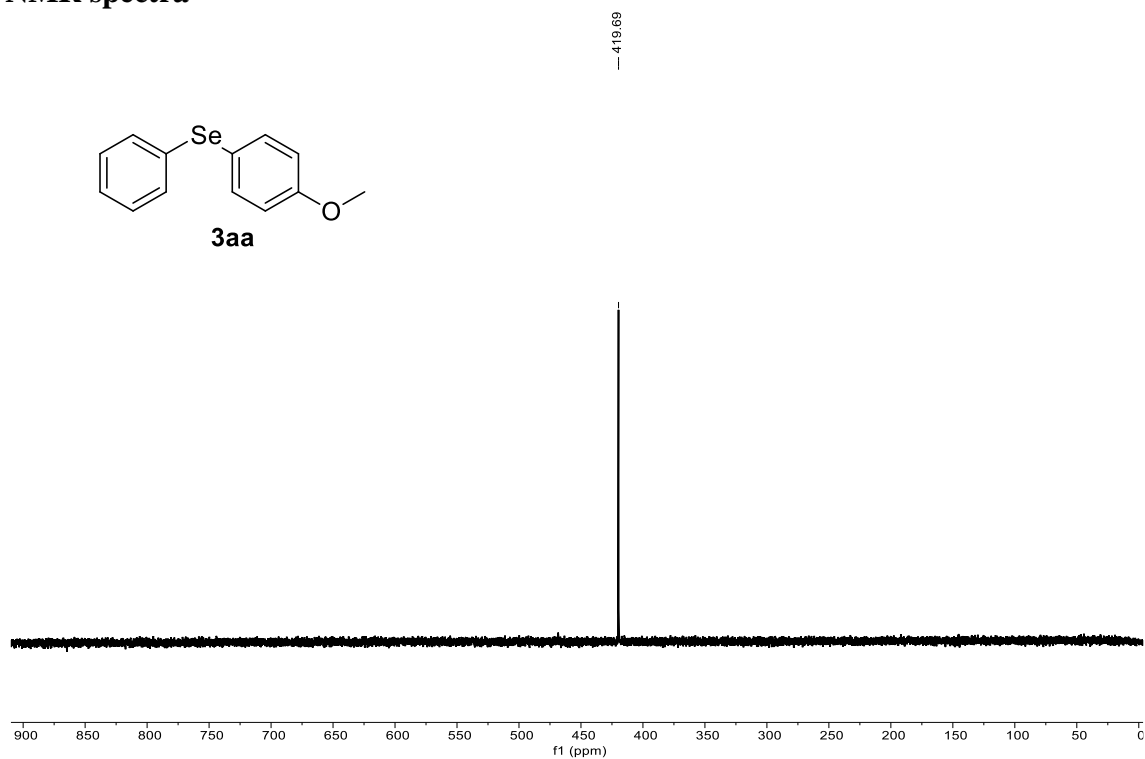

**Figure S97**  $^{77}\text{Se}$  NMR (95.5 MHz) spectrum of **3aa** in  $\text{CDCl}_3$

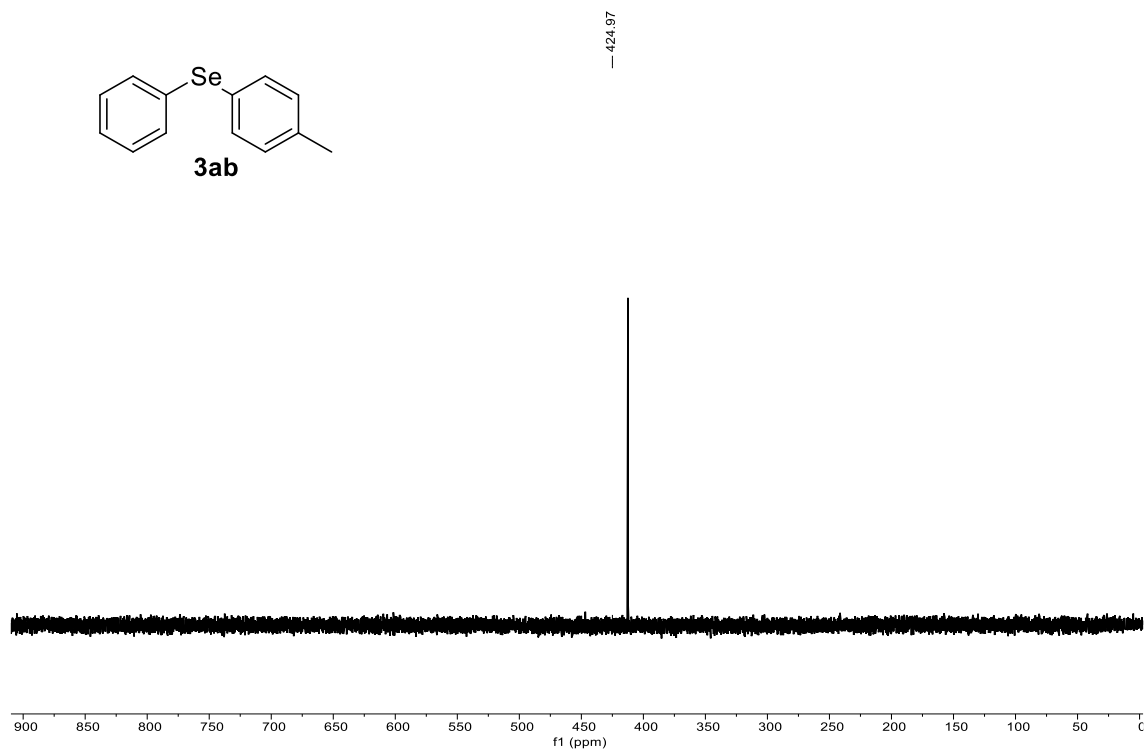

**Figure S98**  $^{77}\text{Se}$  NMR (95.5 MHz) spectrum of **3ab** in  $\text{CDCl}_3$

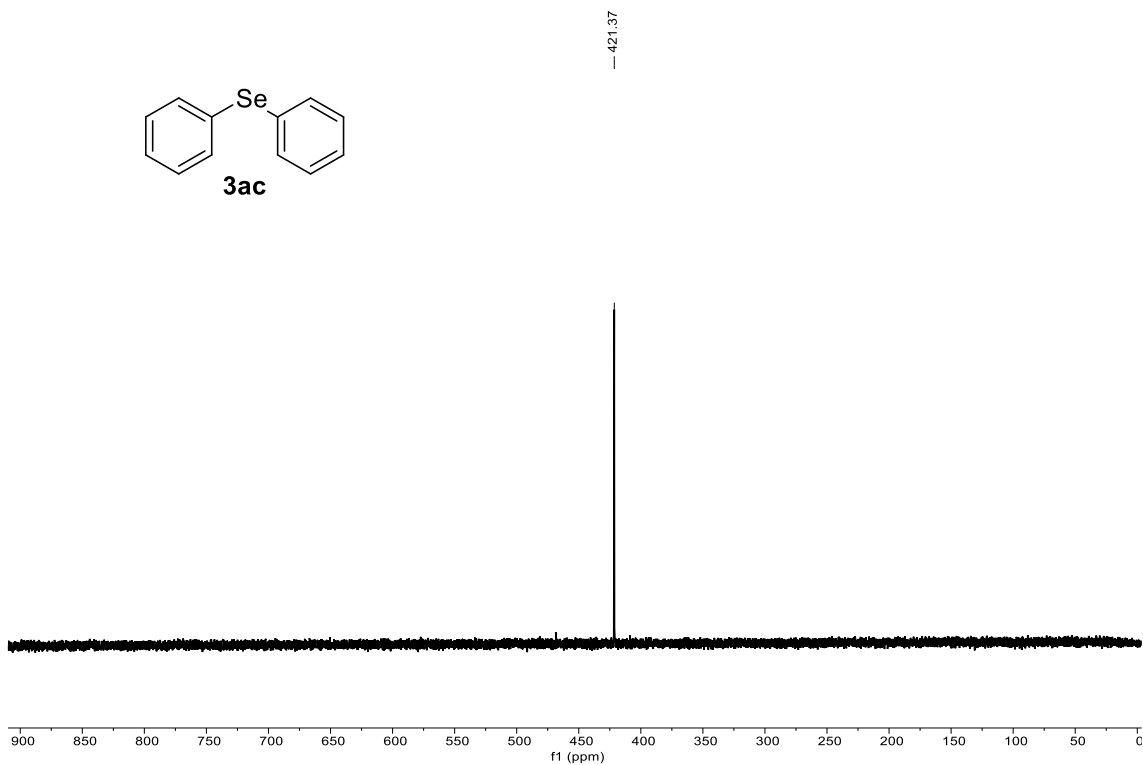

**Figure S99**  $^{77}\text{Se}$  NMR (95.5 MHz) spectrum of **3ac** in  $\text{CDCl}_3$

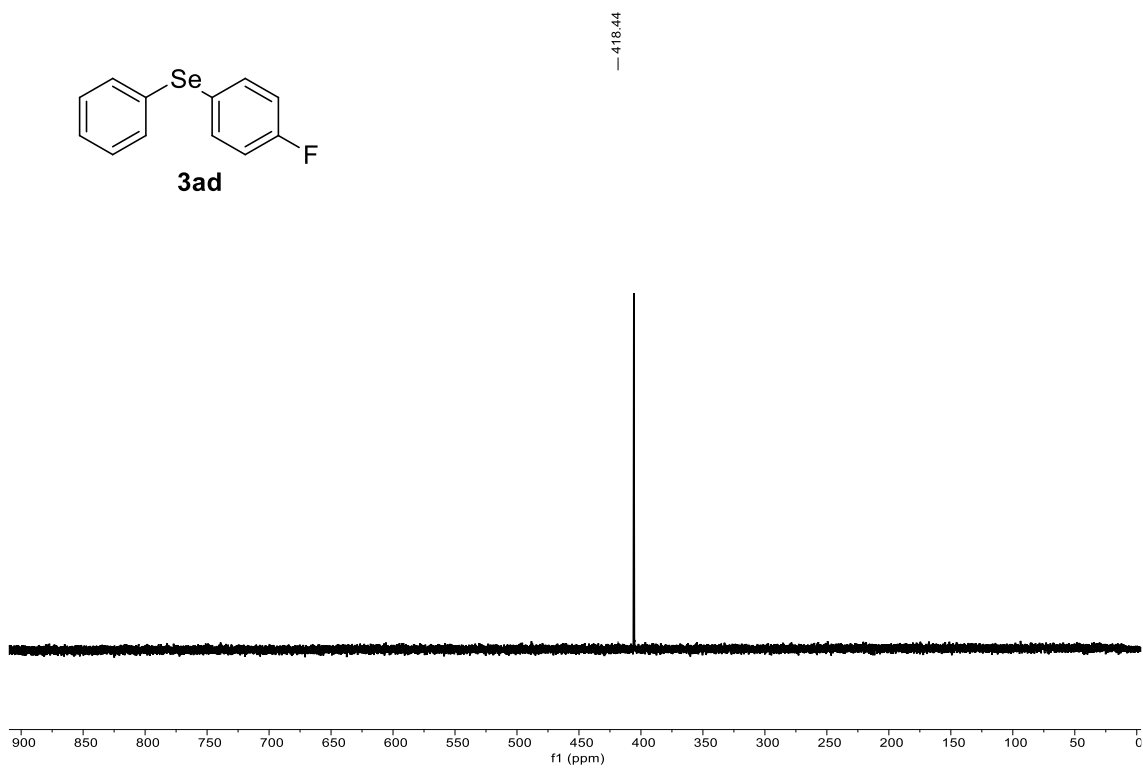

**Figure S100**  $^{77}\text{Se}$  NMR (95.5 MHz) spectrum of **3ad** in  $\text{CDCl}_3$

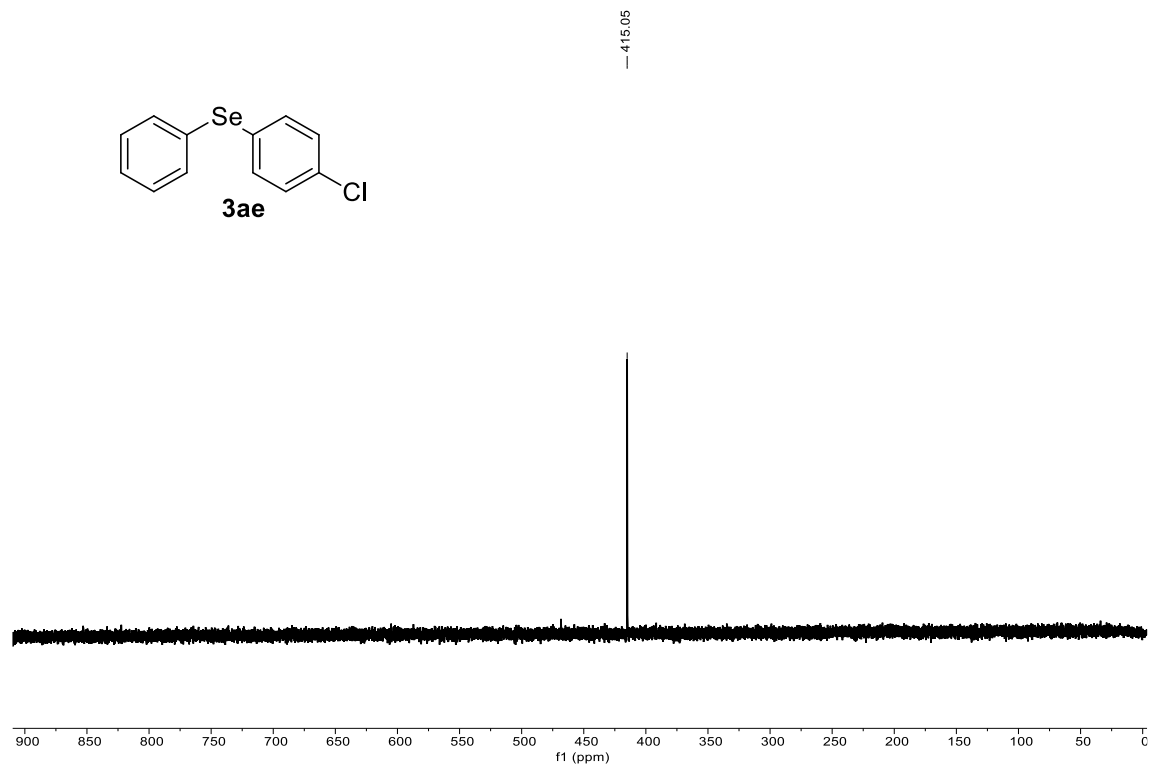

**Figure S101** <sup>77</sup>Se NMR (95.5 MHz) spectrum of **3ae** in CDCl<sub>3</sub>

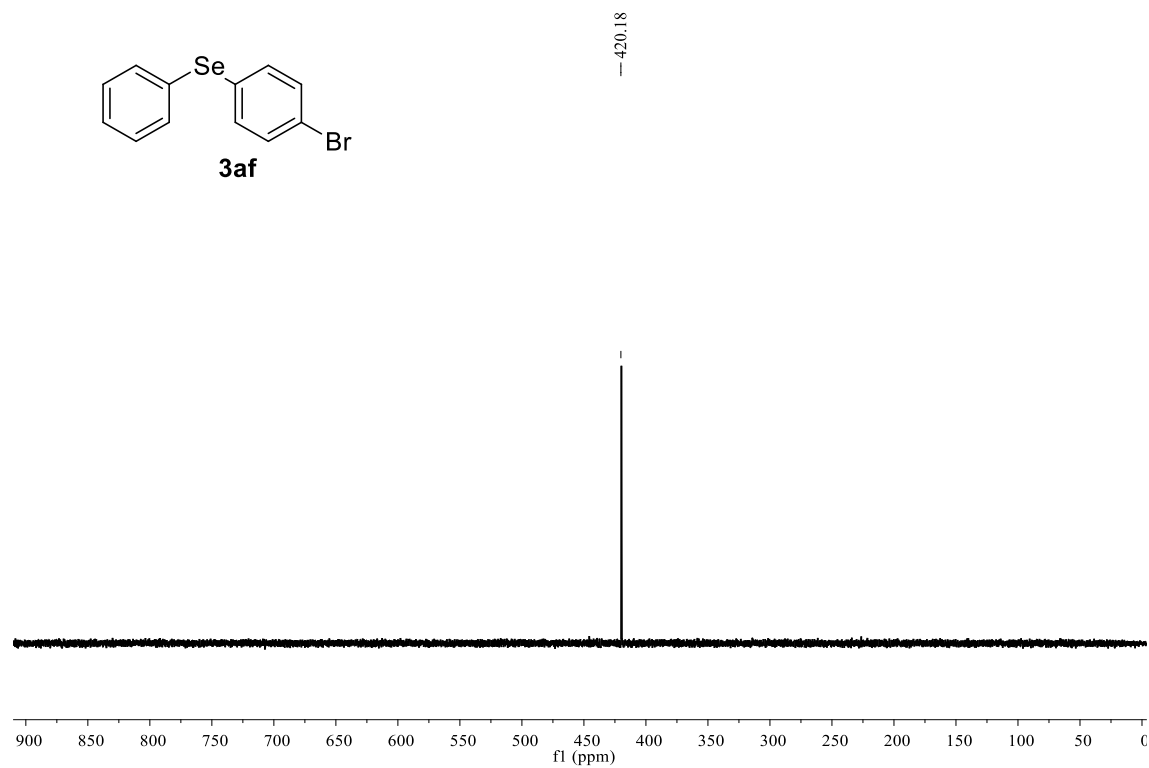

**Figure S102** <sup>77</sup>Se NMR (95.5 MHz) spectrum of **3af** in CDCl<sub>3</sub>

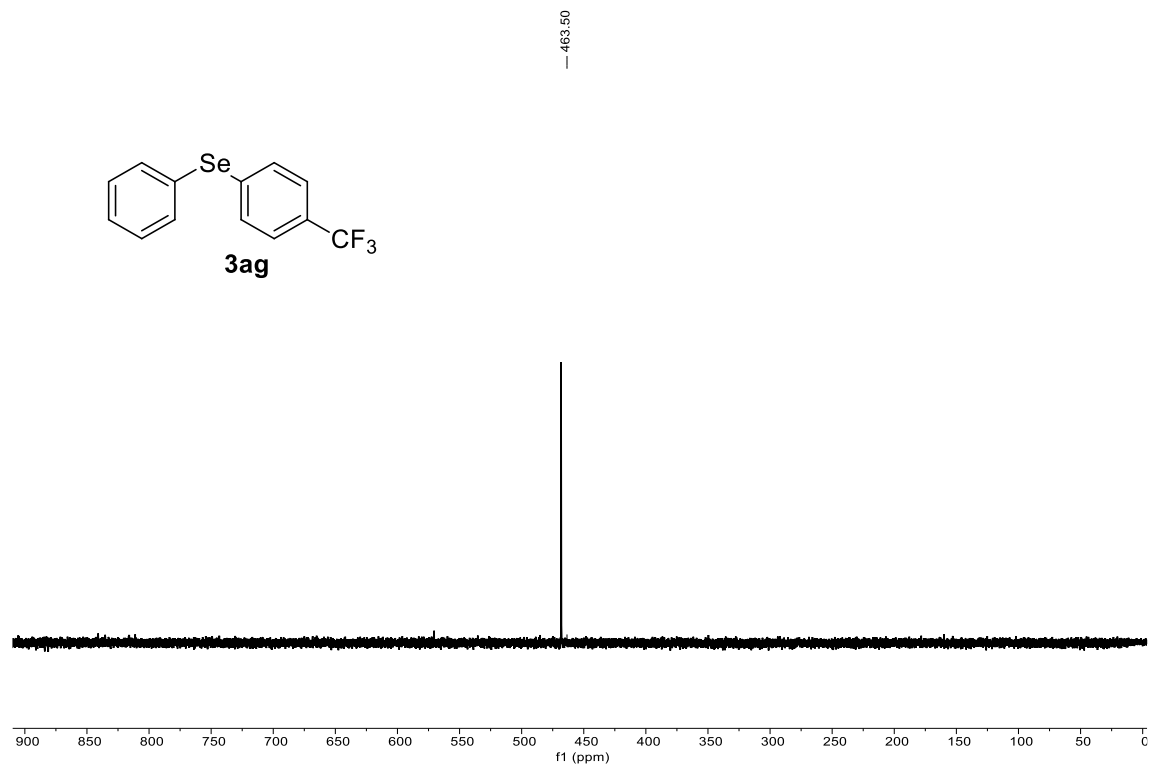

**Figure S103** <sup>77</sup>Se NMR (95.5 MHz) spectrum of **3ag** in CDCl<sub>3</sub>

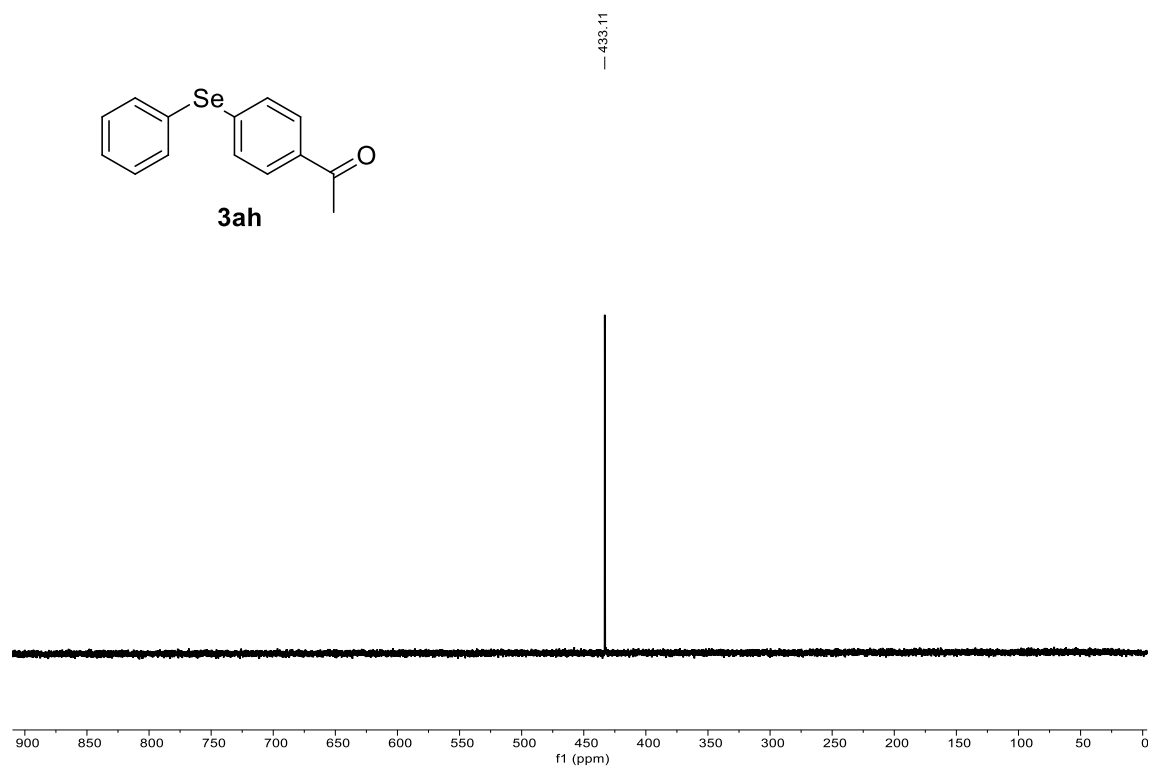

**Figure S104** <sup>77</sup>Se NMR (95.5 MHz) spectrum of **3ah** in CDCl<sub>3</sub>

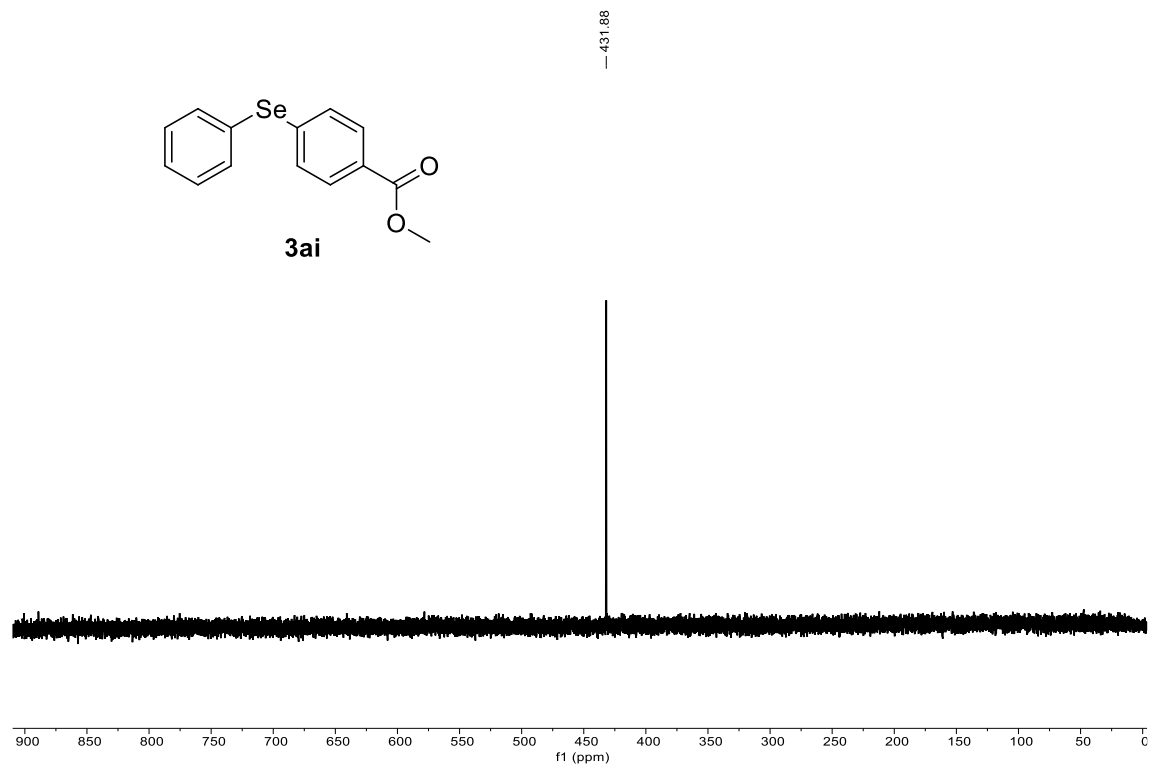

**Figure S105**  $^{77}\text{Se}$  NMR (95.5 MHz) spectrum of **3ai** in  $\text{CDCl}_3$

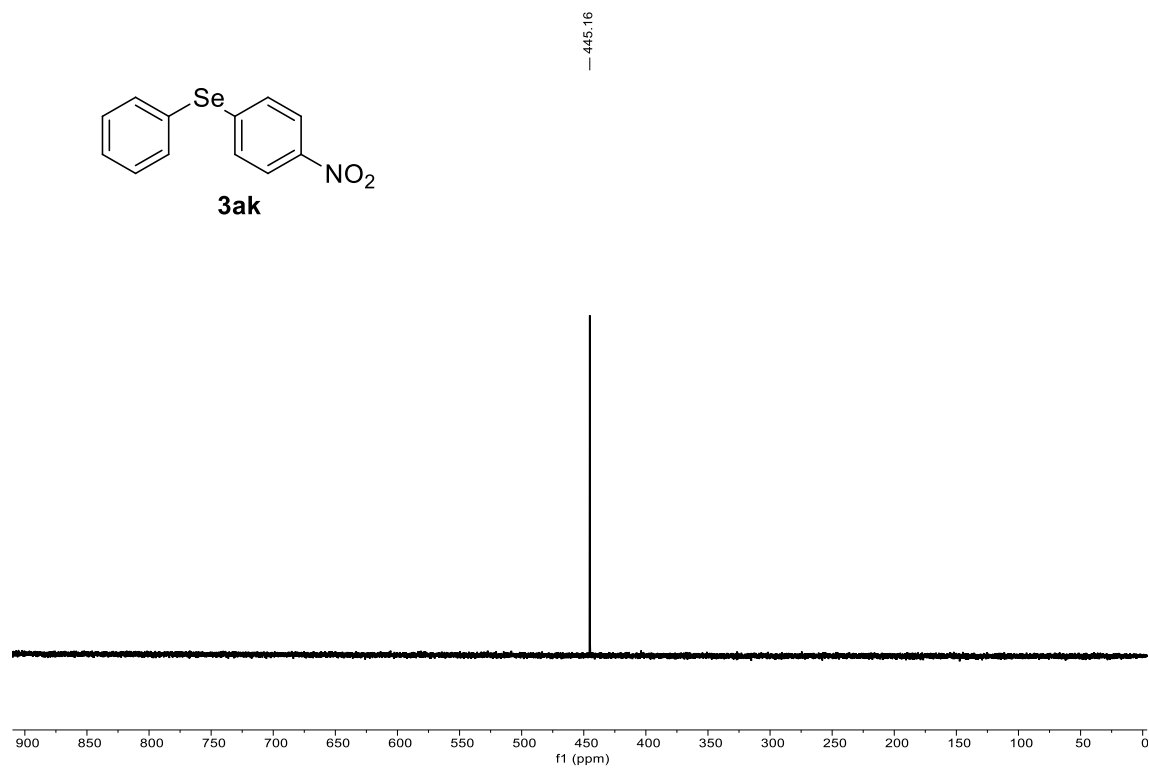

**Figure S106**  $^{77}\text{Se}$  NMR (95.5 MHz) spectrum of **3ak** in  $\text{CDCl}_3$

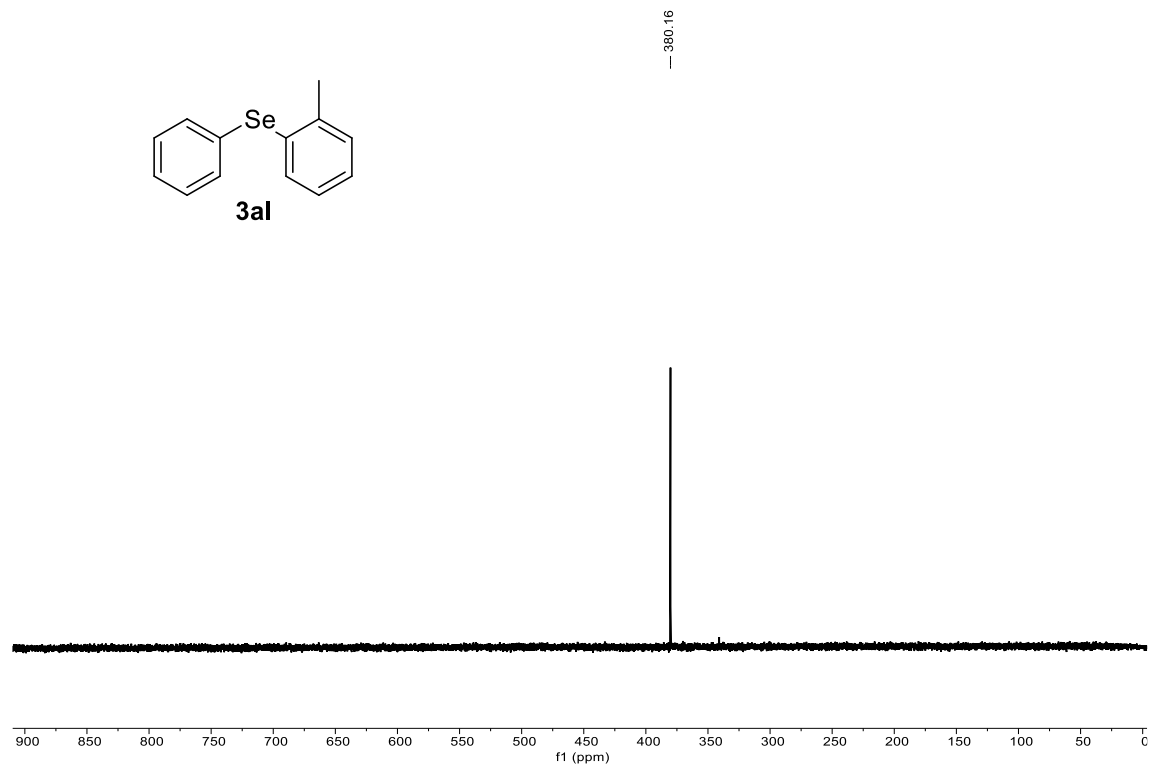

**Figure S107**  $^{77}\text{Se}$  NMR (95.5 MHz) spectrum of **3al** in  $\text{CDCl}_3$

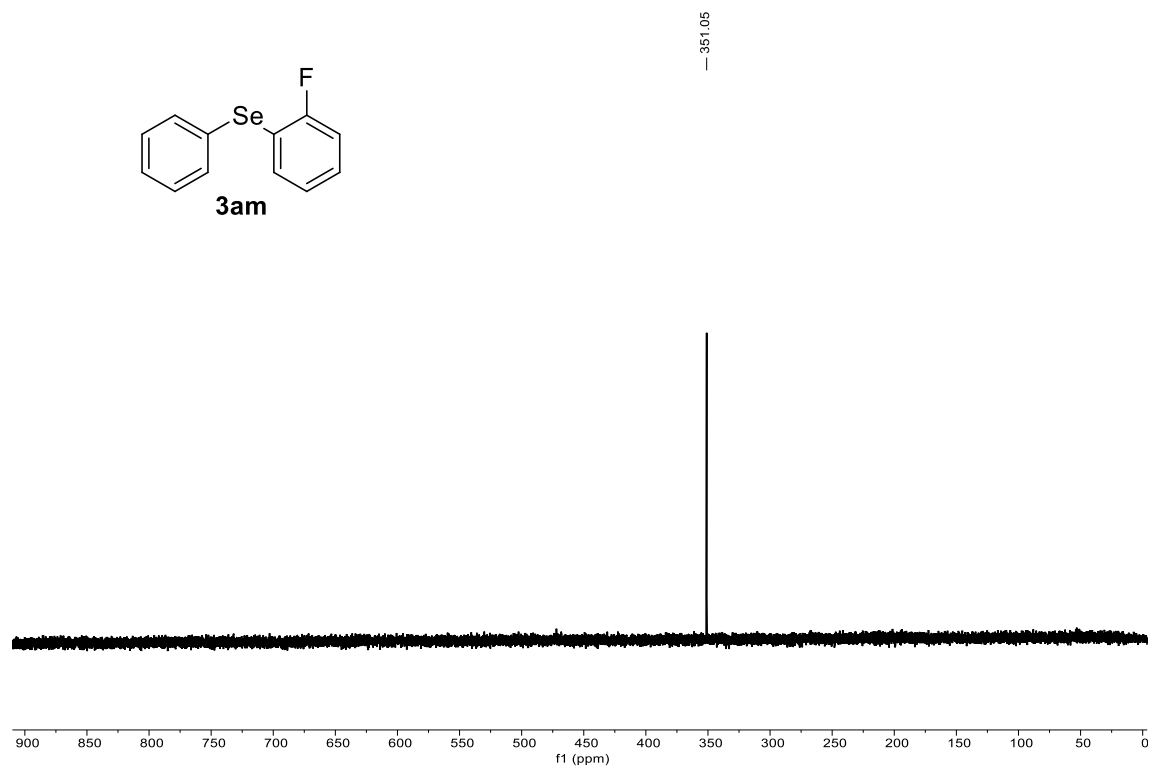

**Figure S108**  $^{77}\text{Se}$  NMR (95.5 MHz) spectrum of **3am** in  $\text{CDCl}_3$

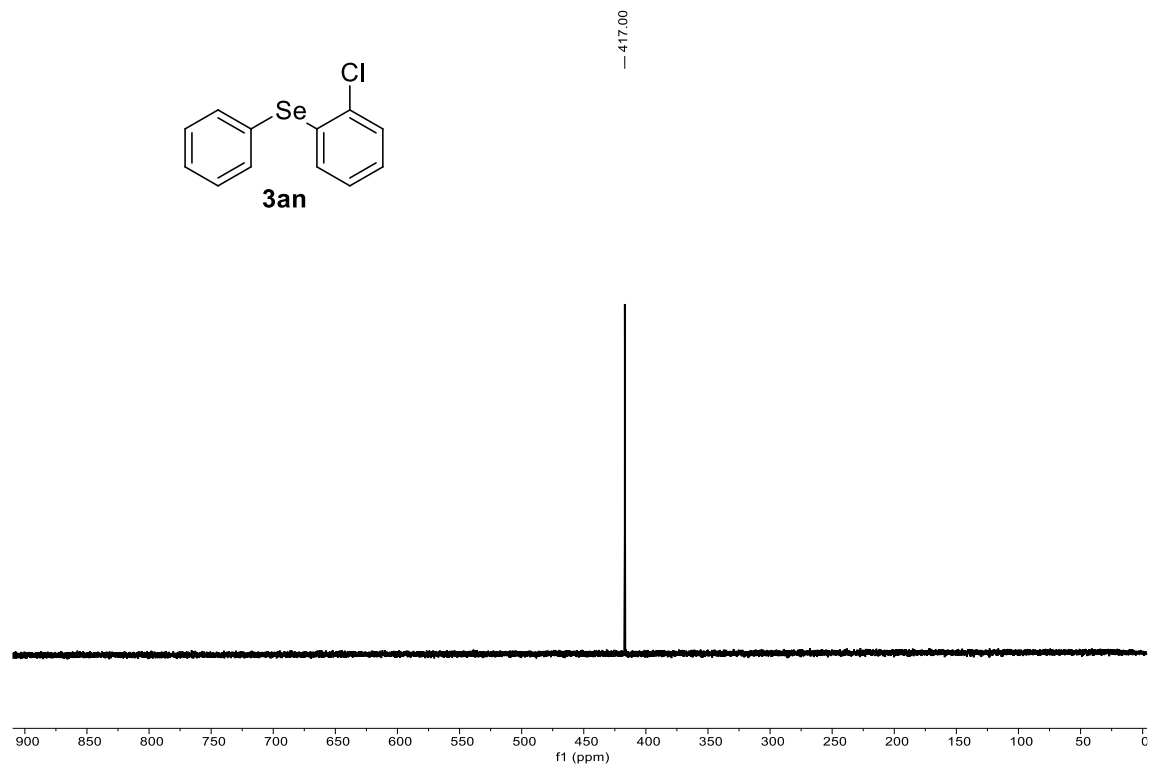

**Figure S109**  $^{77}\text{Se}$  NMR (95.5 MHz) spectrum of **3an** in  $\text{CDCl}_3$

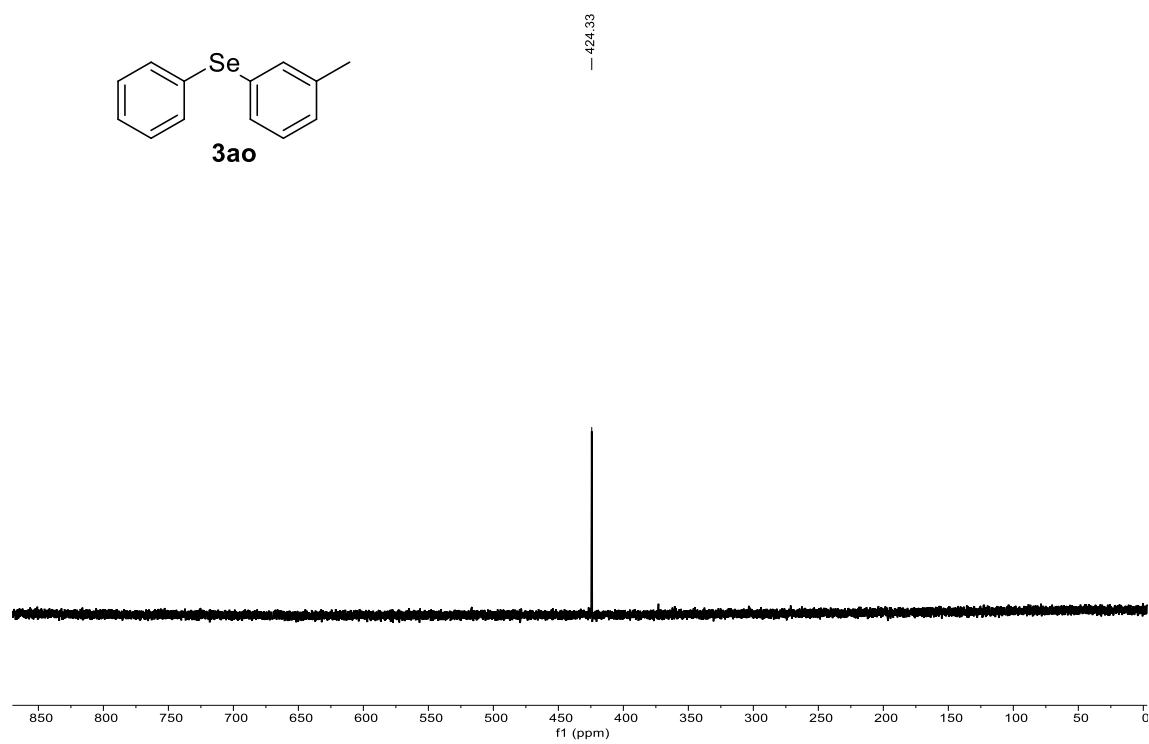

**Figure S110**  $^{77}\text{Se}$  NMR (95.5 MHz) spectrum of **3ao** in  $\text{CDCl}_3$

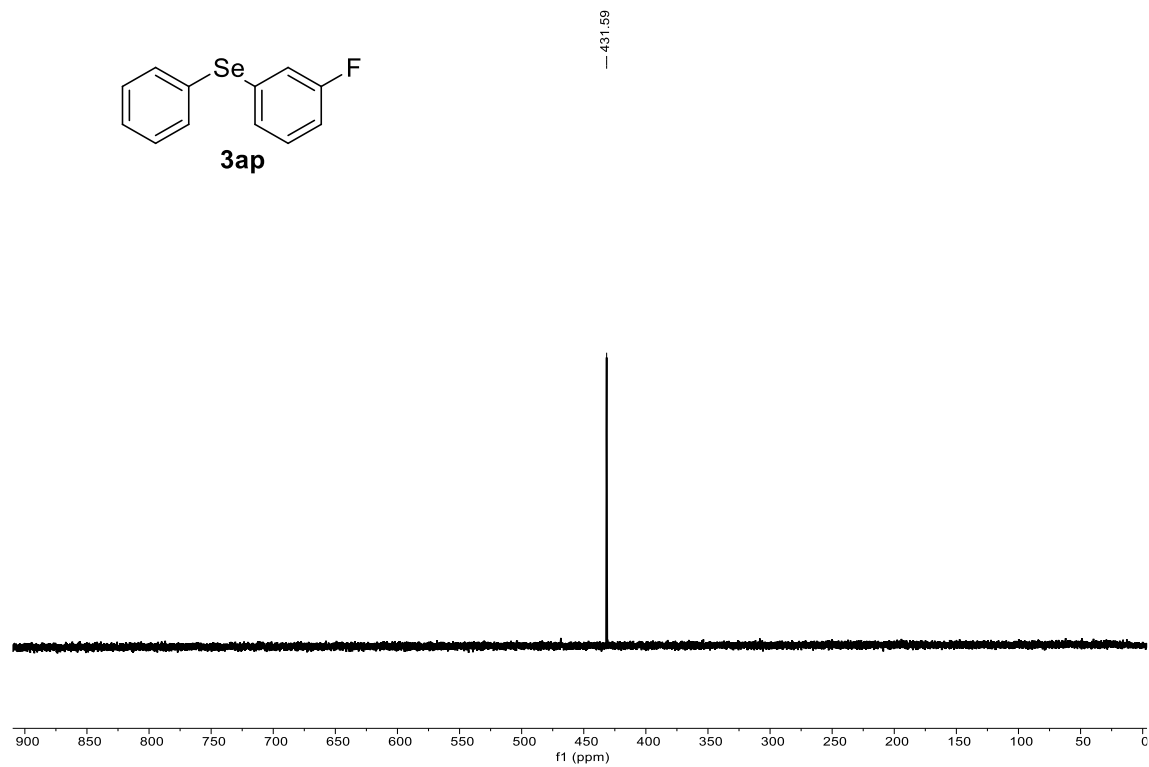

**Figure S111**  $^{77}\text{Se}$  NMR (95.5 MHz) spectrum of **3ap** in  $\text{CDCl}_3$

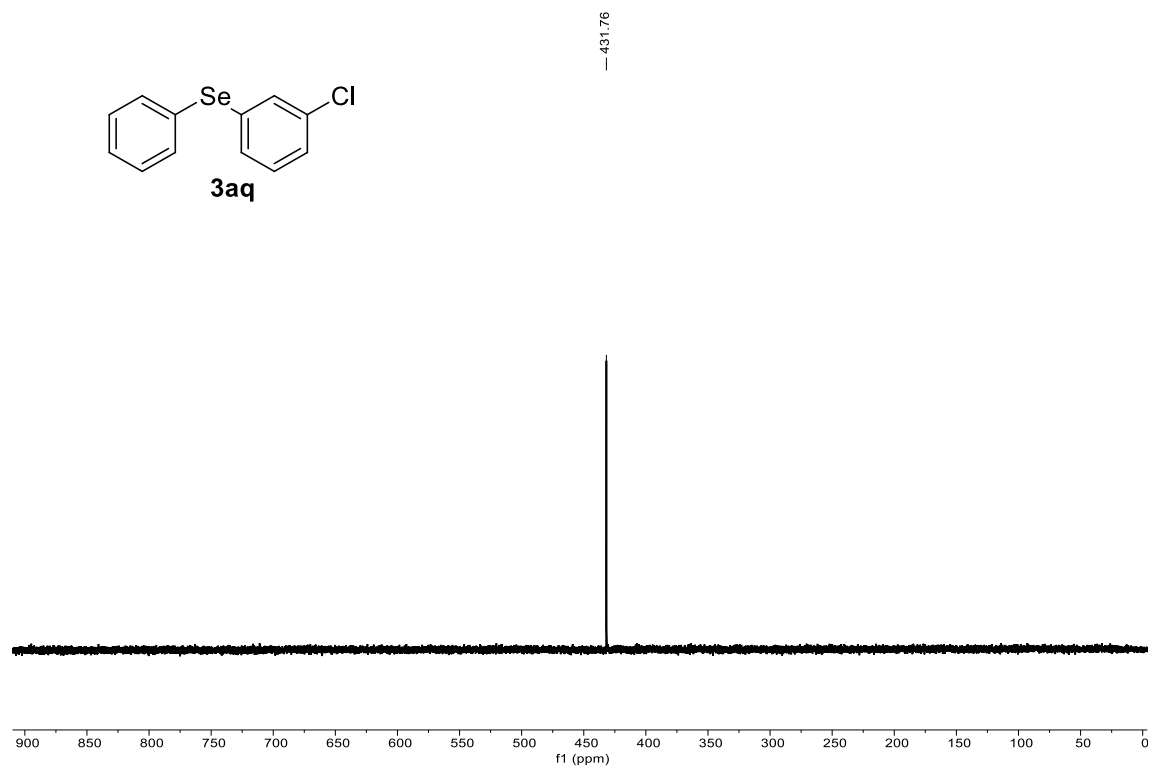

**Figure S112**  $^{77}\text{Se}$  NMR (95.5 MHz) spectrum of **3aq** in  $\text{CDCl}_3$



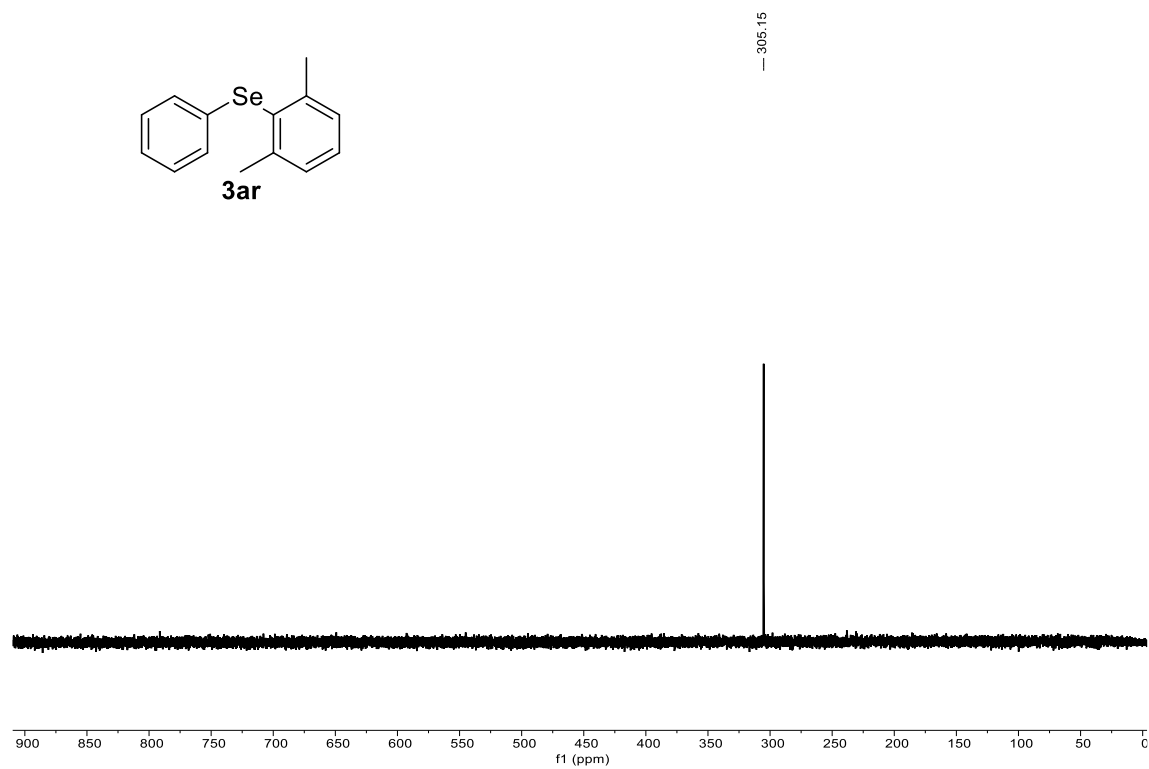

**Figure S113**  $^{77}\text{Se}$  NMR (95.5 MHz) spectrum of **3ar** in  $\text{CDCl}_3$

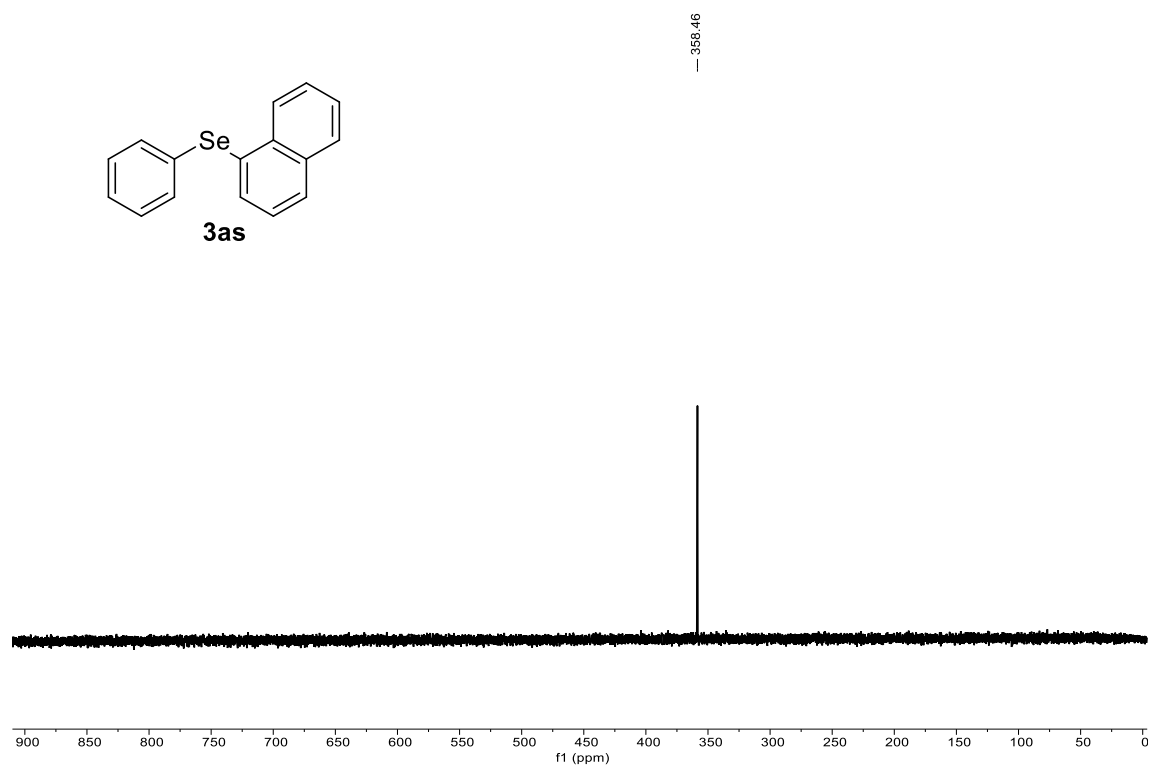

**Figure S114**  $^{77}\text{Se}$  NMR (95.5 MHz) spectrum of **3as** in  $\text{CDCl}_3$

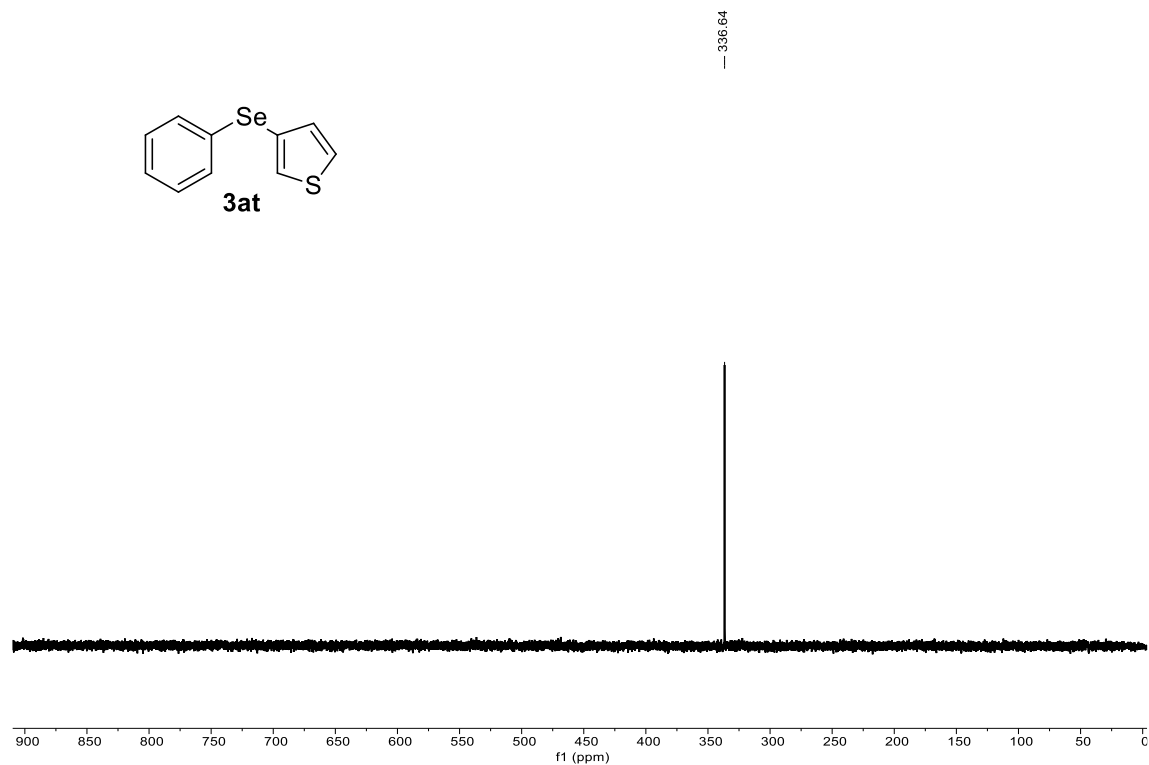

**Figure S115**  $^{77}\text{Se}$  NMR (95.5 MHz) spectrum of **3at** in  $\text{CDCl}_3$

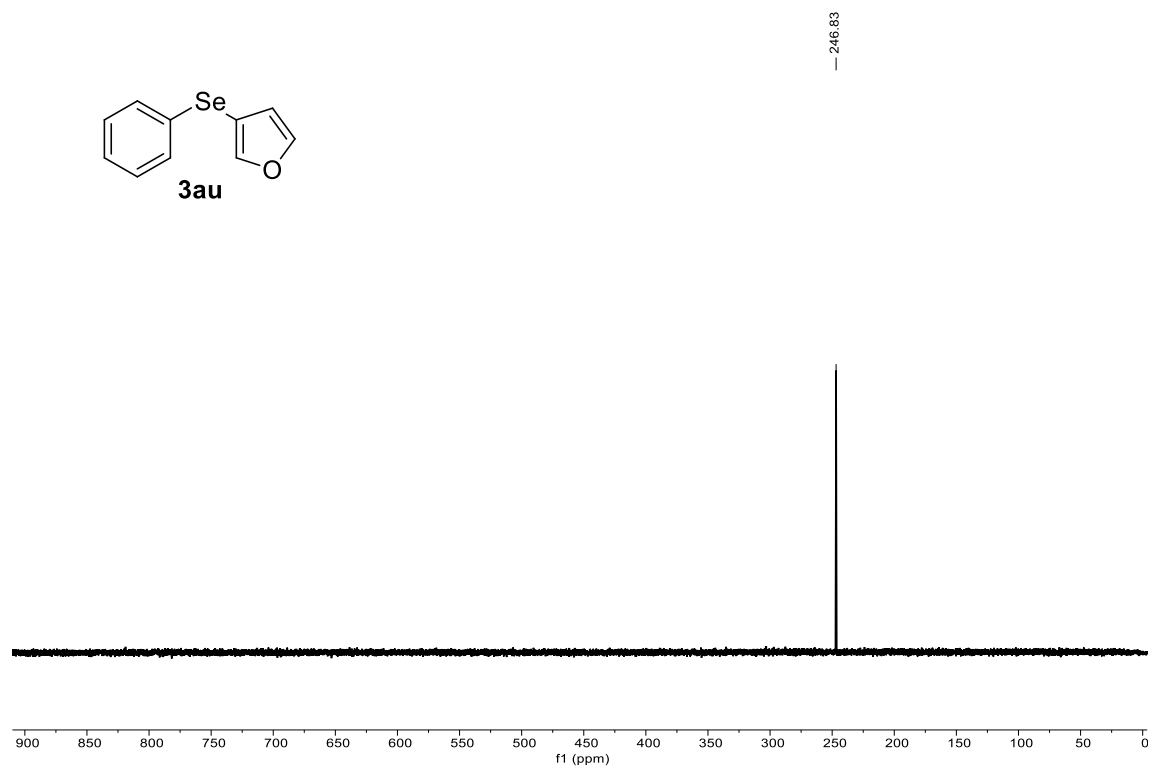

**Figure S116**  $^{77}\text{Se}$  NMR (95.5 MHz) spectrum of **3au** in  $\text{CDCl}_3$

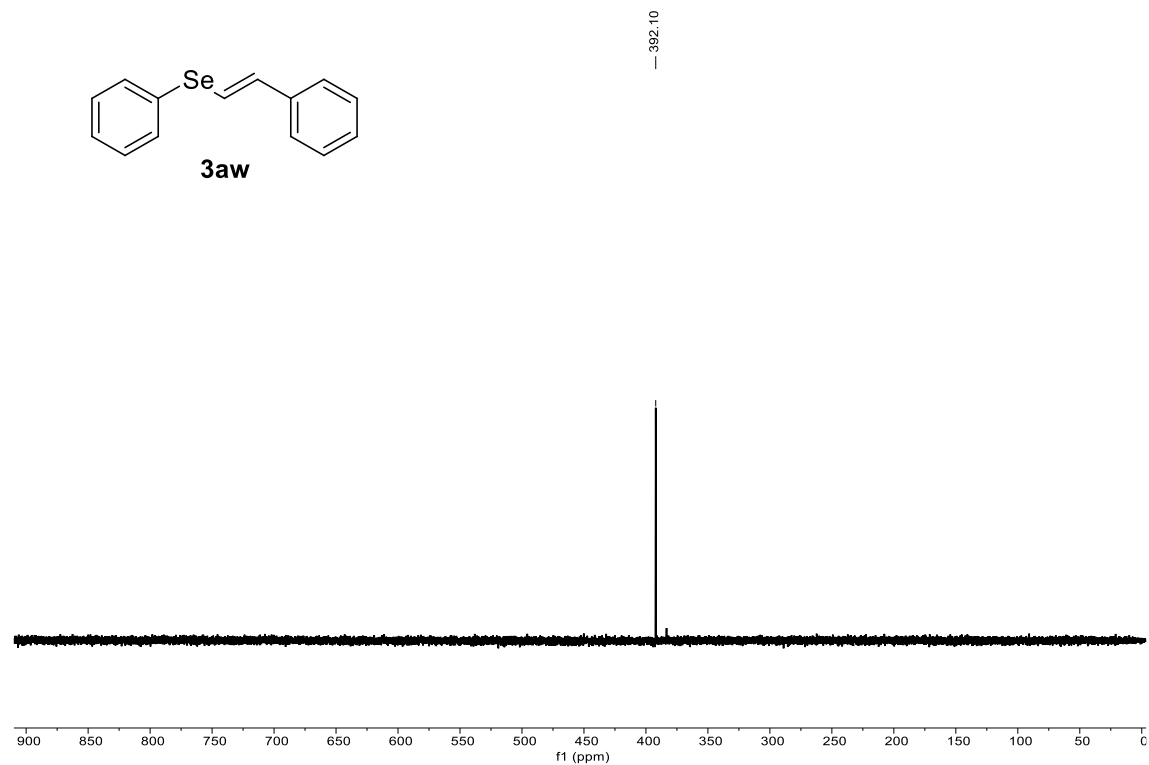

**Figure S117** <sup>77</sup>Se NMR (95.5 MHz) spectrum of **3aw** in CDCl<sub>3</sub>

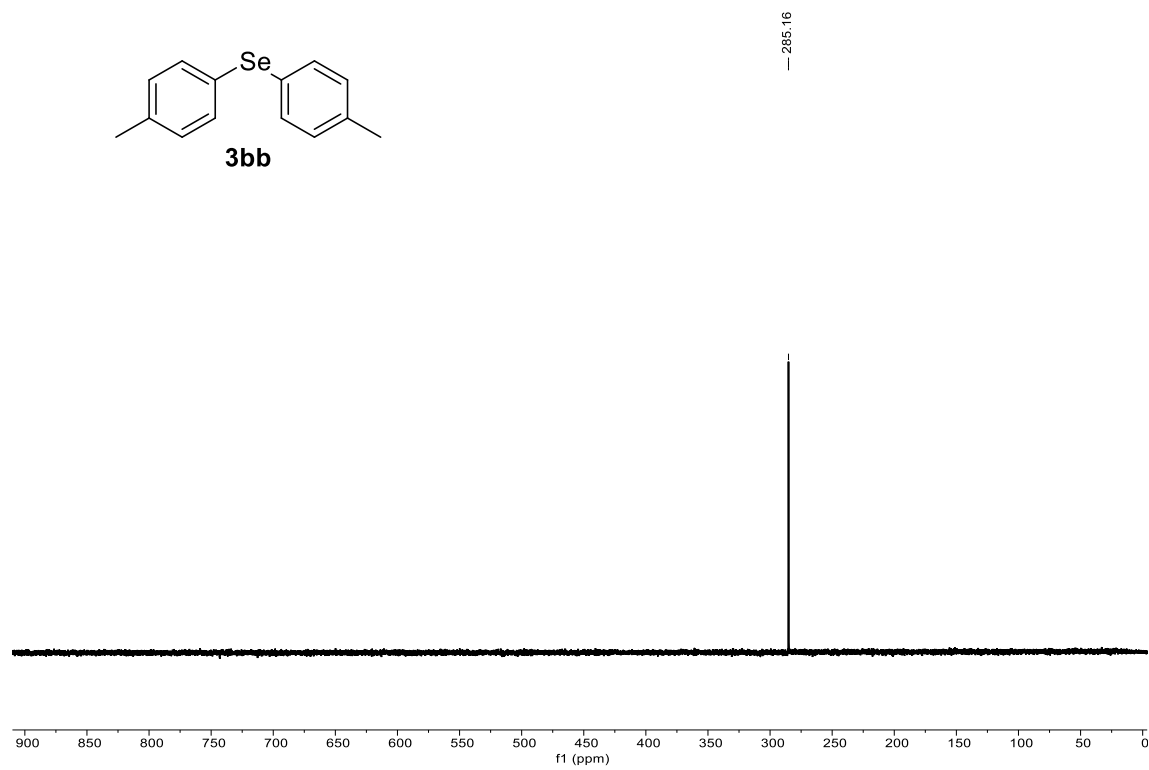

**Figure S118** <sup>77</sup>Se NMR (95.5 MHz) spectrum of **3bb** in CDCl<sub>3</sub>

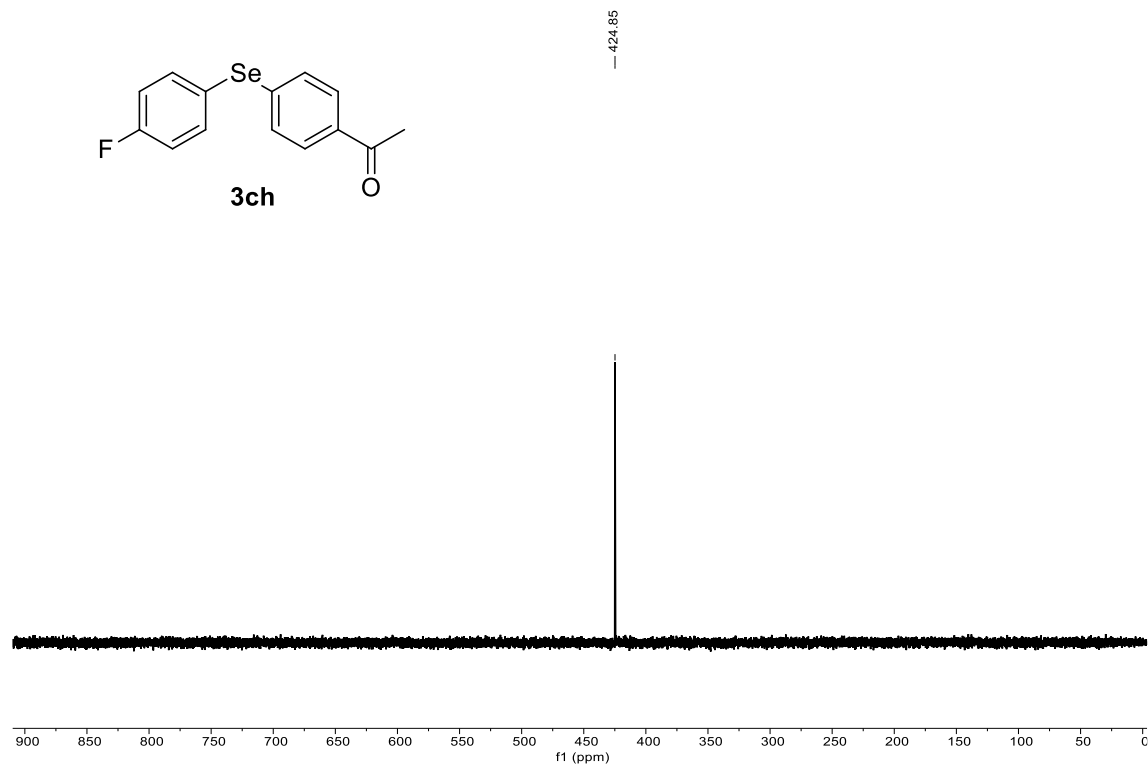

**Figure S119**  $^{77}\text{Se}$  NMR (95.5 MHz) spectrum of **3ch** in  $\text{CDCl}_3$

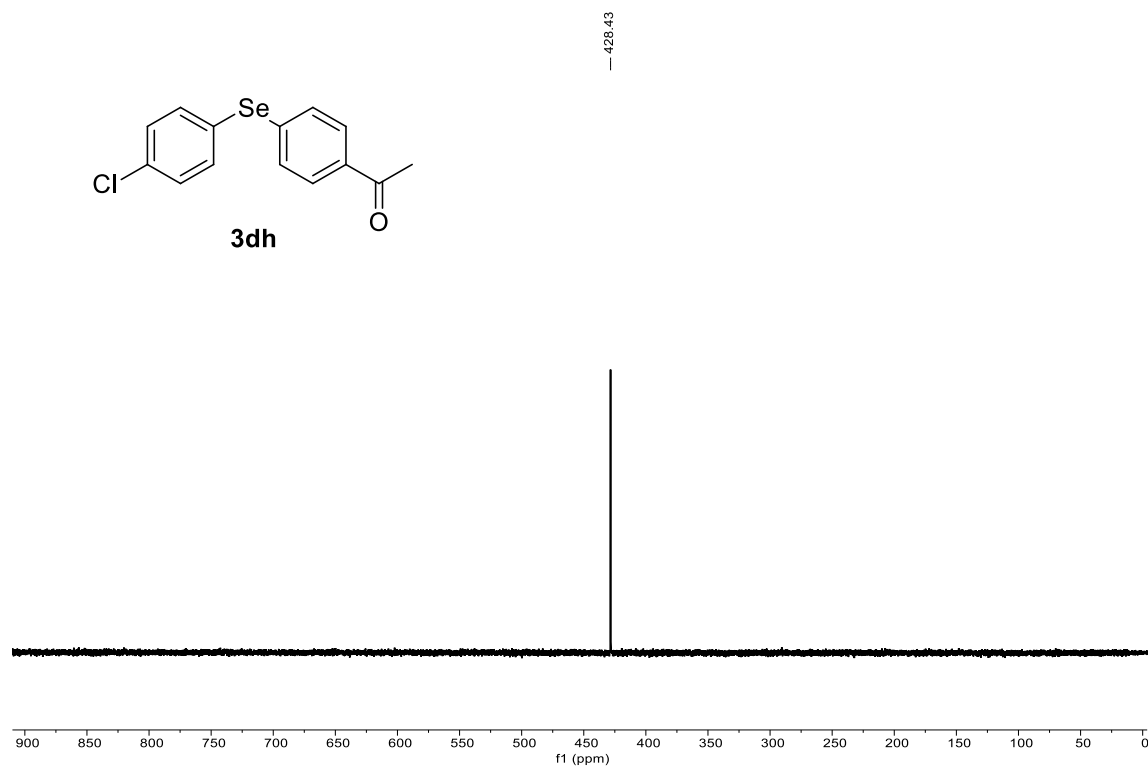

**Figure S120**  $^{77}\text{Se}$  NMR (95.5 MHz) spectrum of **3dh** in  $\text{CDCl}_3$

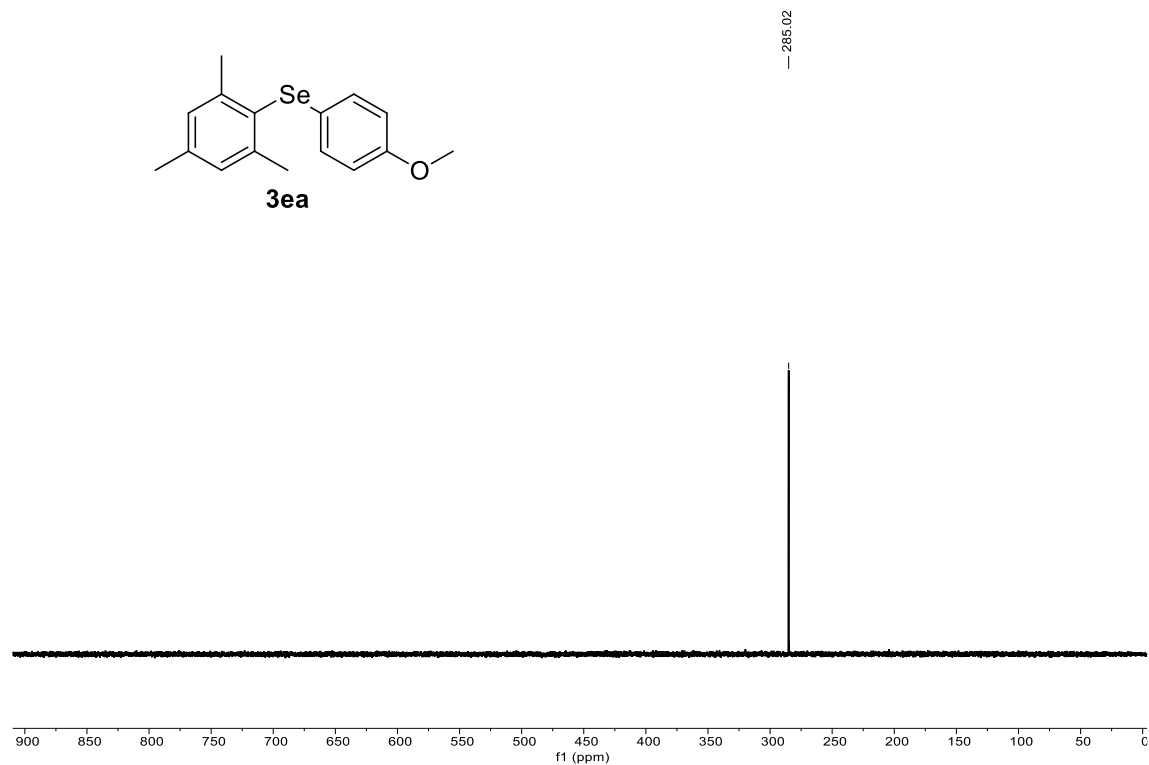

**Figure S121**  $^{77}\text{Se}$  NMR (95.5 MHz) spectrum of **3ea** in  $\text{CDCl}_3$

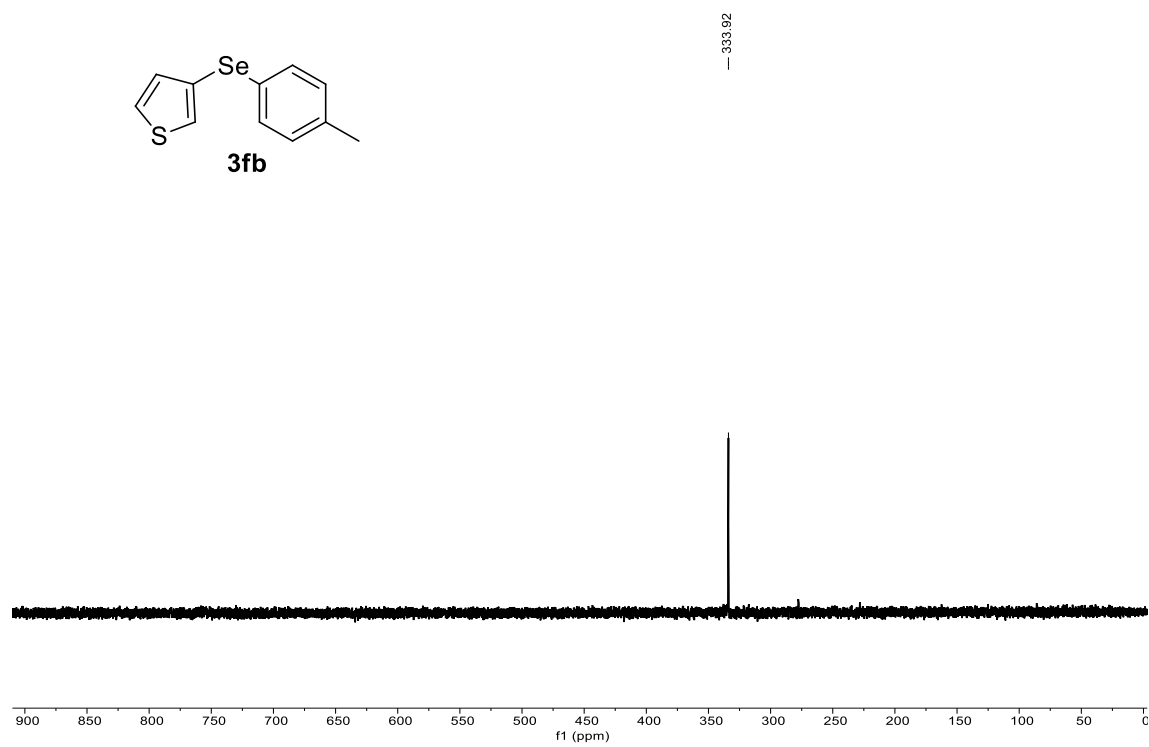

**Figure S122**  $^{77}\text{Se}$  NMR (95.5 MHz) spectrum of **3fb** in  $\text{CDCl}_3$

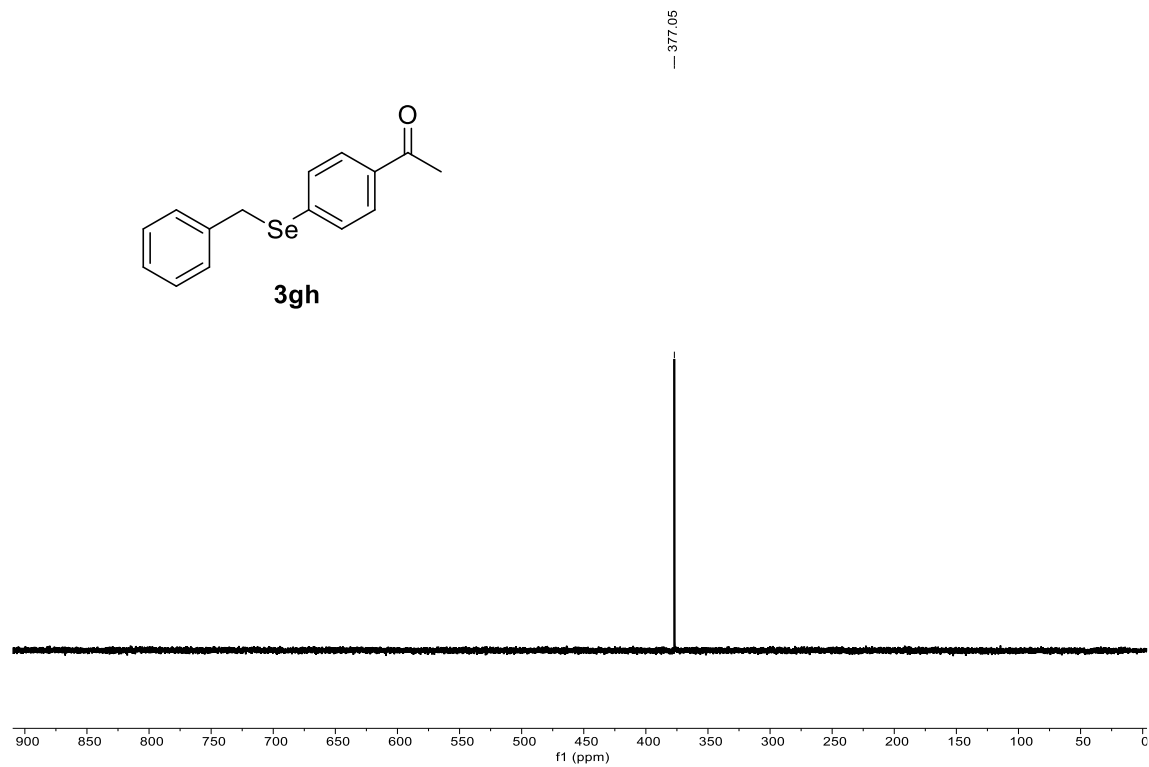

**Figure S123** <sup>77</sup>Se NMR (95.5 MHz) spectrum of **3gh** in CDCl<sub>3</sub>

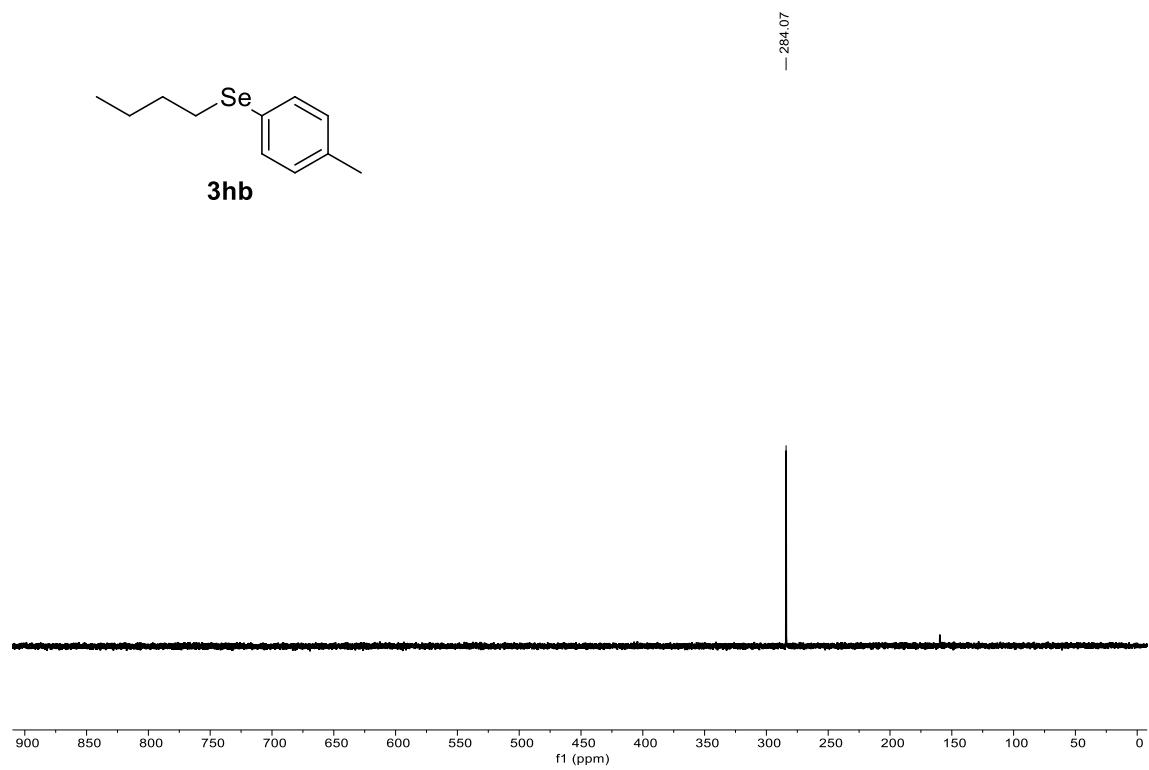

**Figure S124** <sup>77</sup>Se NMR (95.5 MHz) spectrum of **3hb** in CDCl<sub>3</sub>

## 5. $^{19}\text{F}$ NMR Spectra of 3ad, 3ag, 3am, 3ap, 3ch and 5ed

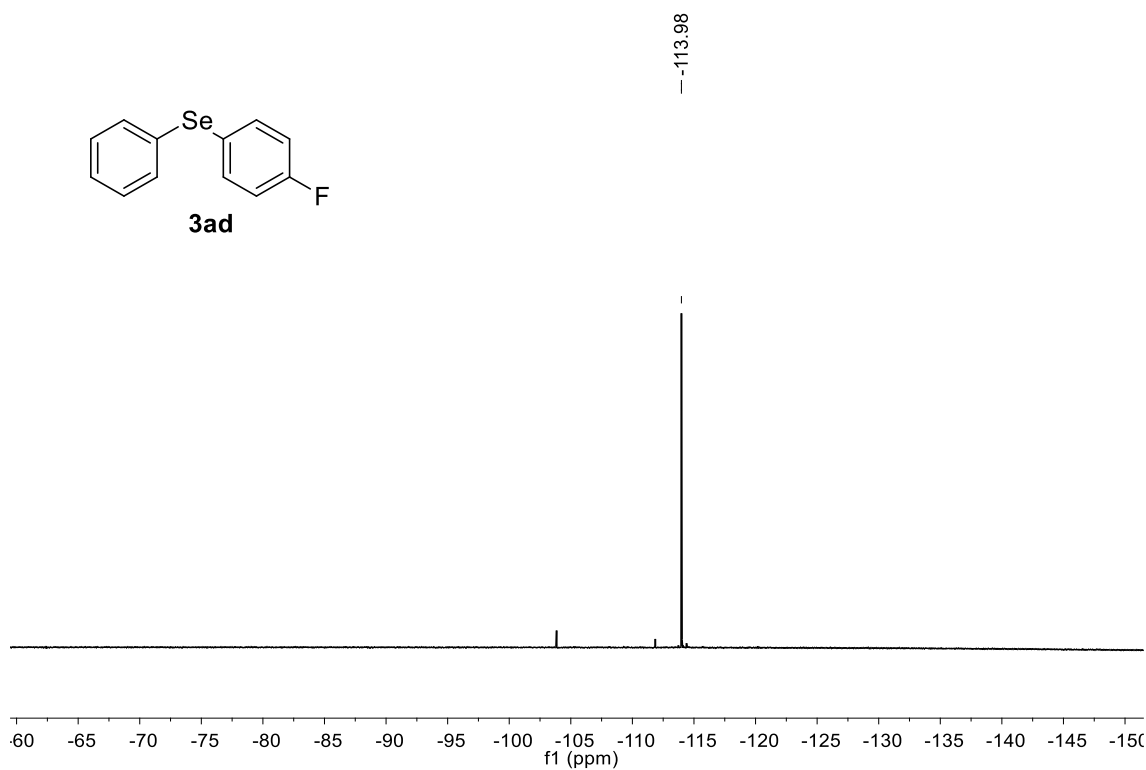

**Figure S125**  $^{19}\text{F}$  NMR (376 MHz) spectrum of **3ad** in  $\text{CDCl}_3$

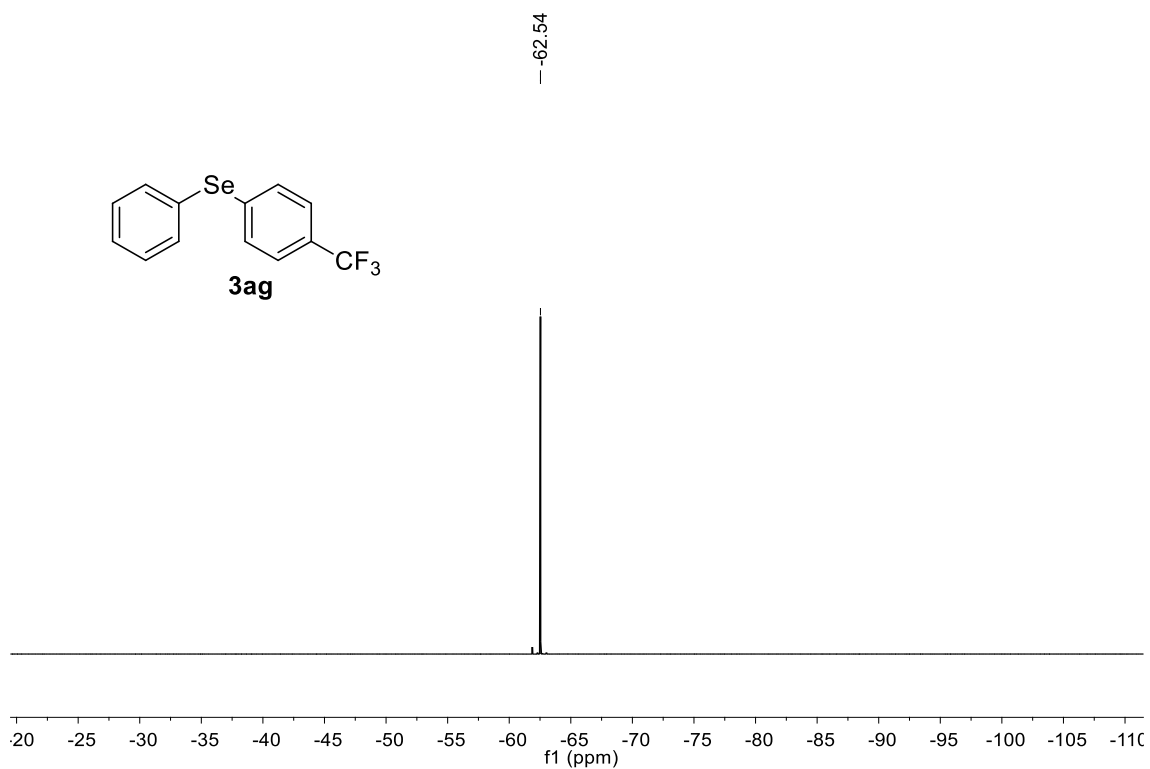

**Figure S126**  $^{19}\text{F}$  NMR (376 MHz) spectrum of **3ad** in  $\text{CDCl}_3$

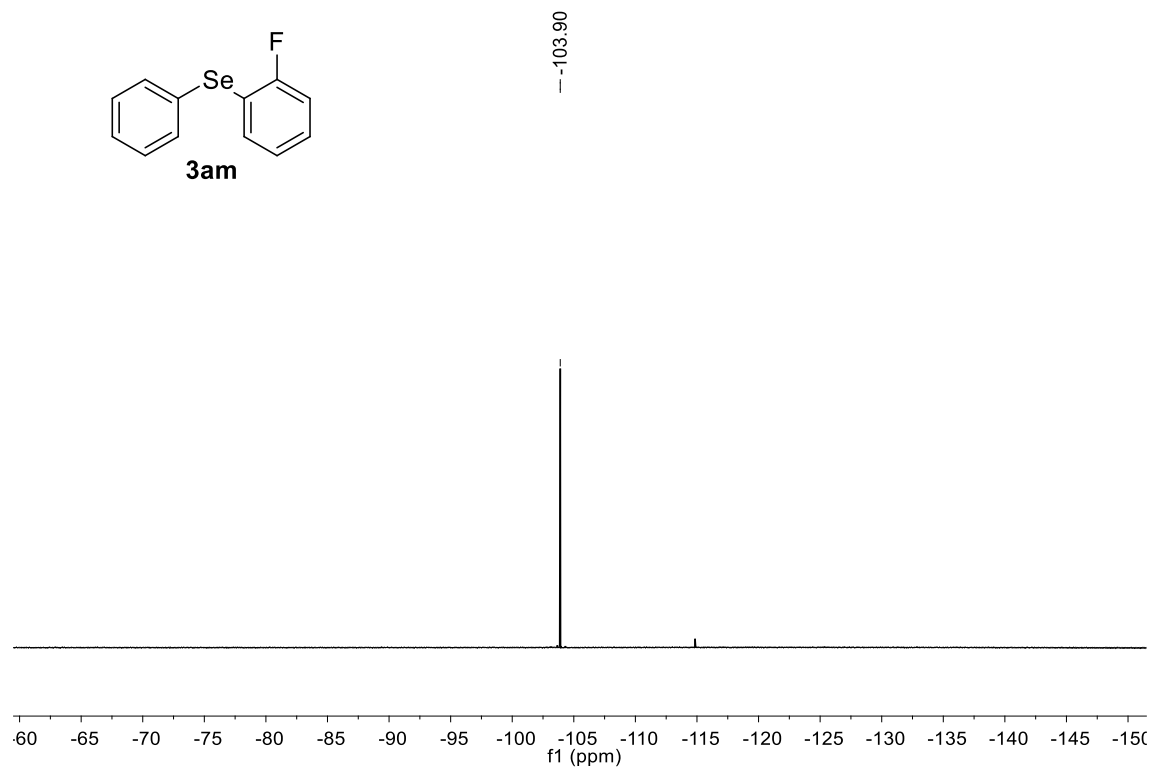

**Figure S127** <sup>19</sup>F NMR (376 MHz) spectrum of **3am** in CDCl<sub>3</sub>

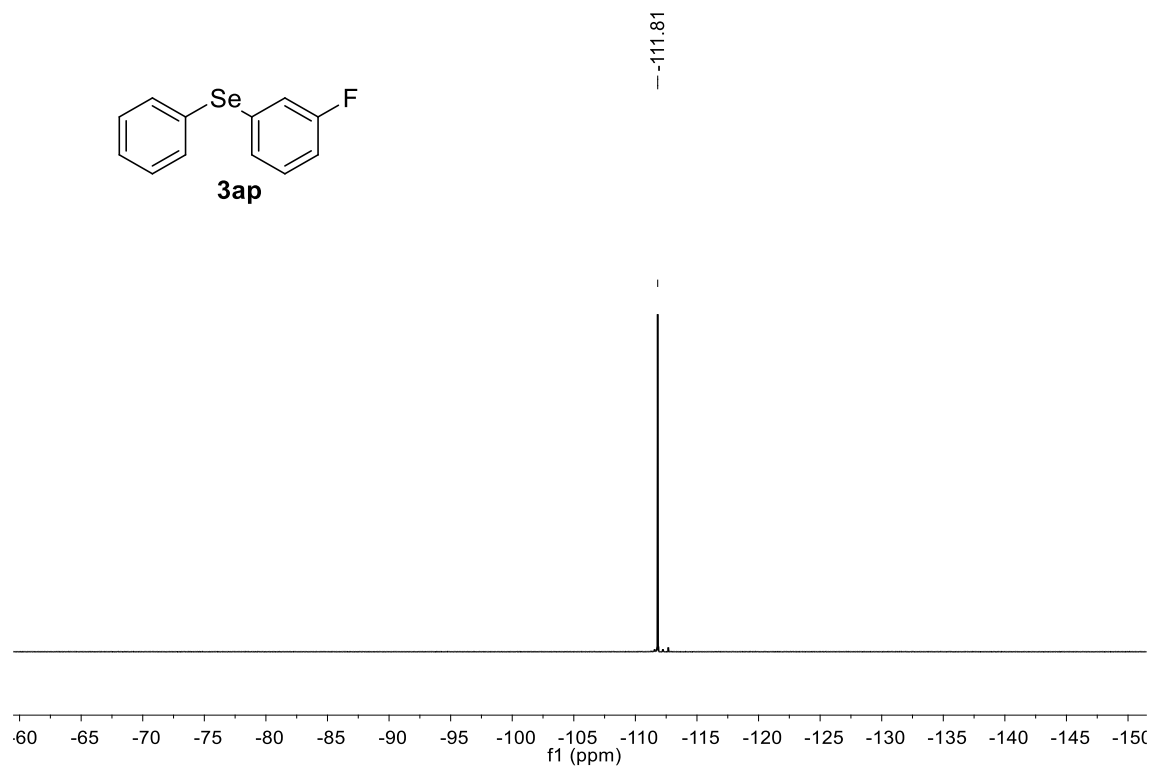

**Figure S128** <sup>19</sup>F NMR (376 MHz) spectrum of **3ap** in CDCl<sub>3</sub>



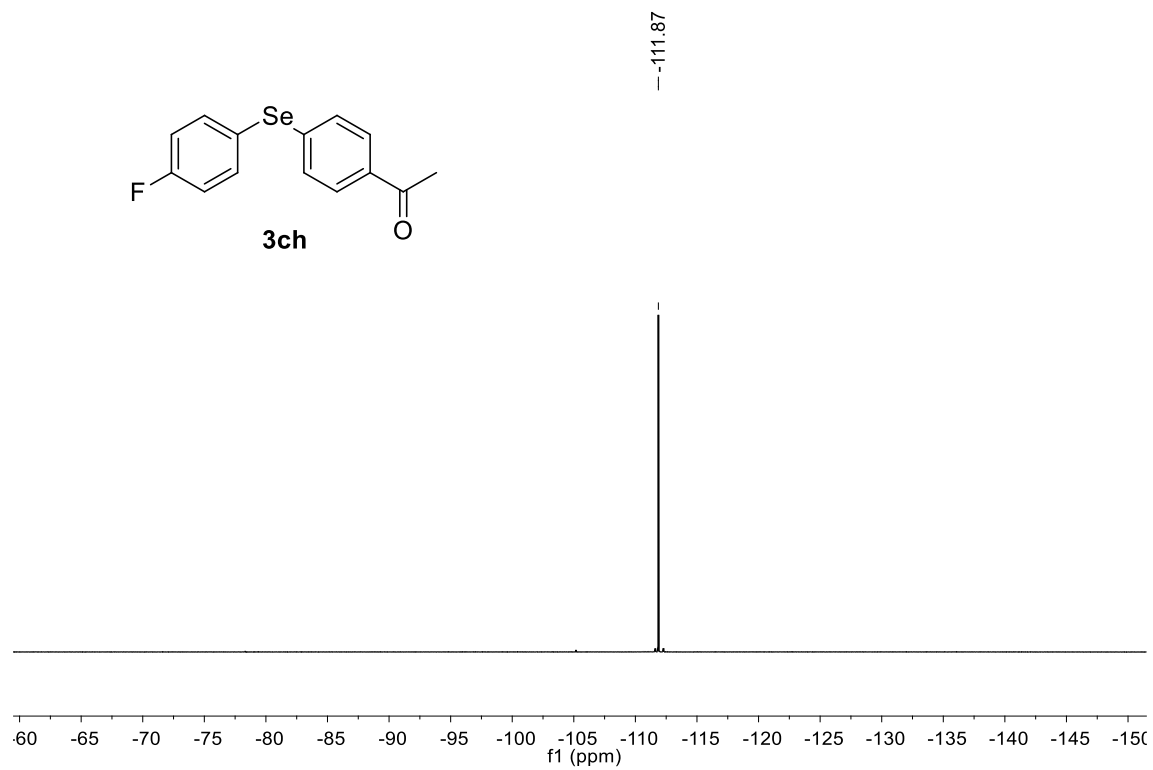

**Figure S129** <sup>19</sup>F NMR (376 MHz) spectrum of **3ch** in CDCl<sub>3</sub>

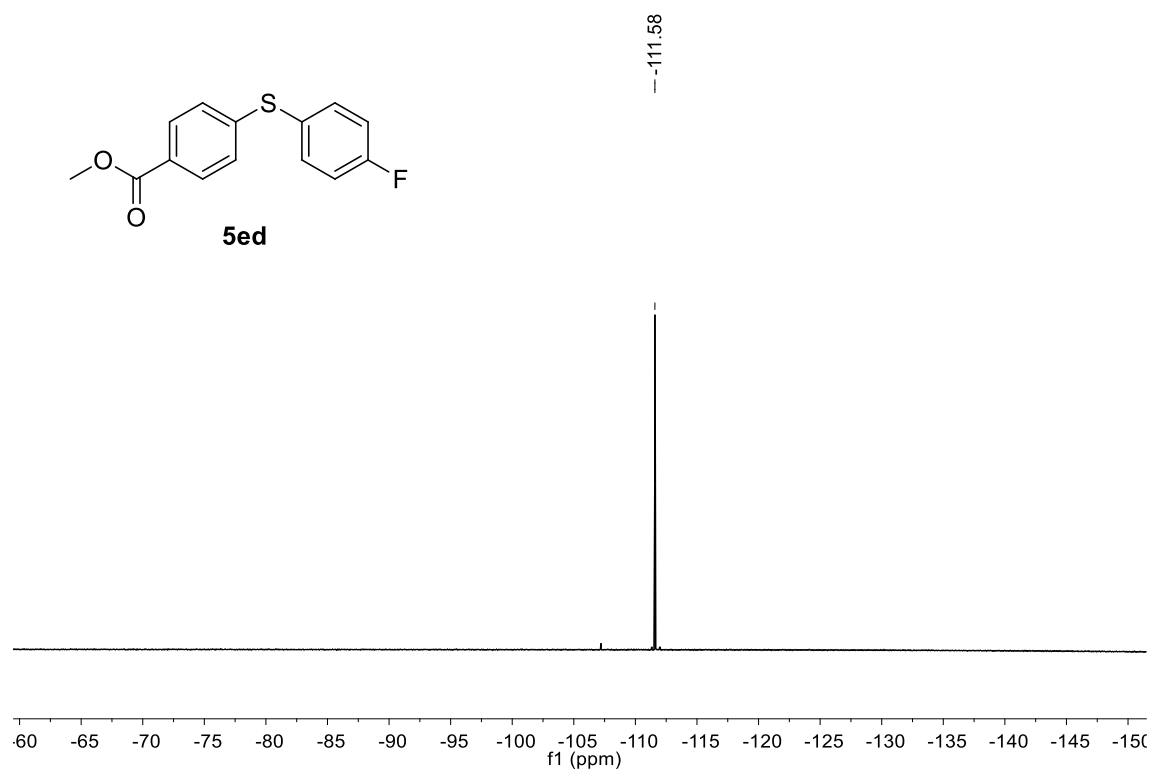

**Figure S130** <sup>19</sup>F NMR (376 MHz) spectrum of **5ed** in CDCl<sub>3</sub>
